# Supplementary material
Source: PubMed Central journal article supplement (PMC5665708)
Supplement: NIHMS900074-supplement-10439_2017_1899_MOESM1_ESM.pdf [file NIHMS900074-supplement-10439_2017_1899_MOESM1_ESM.pdf]

## **Supplementary Methods**

### **Immunohistochemistry:**

Standard histological approaches described previously were used.<sup>1</sup> The proteins EMILIN1, CILP1, LTBP3, and FBLN5 were evaluated by immunohistochemistry using routine heat induced epitope retrieval (HIER) with 10 mM sodium citrate, pH 6.0, 0.05% Tween 20 followed by overnight incubation. EMILIN1 (Protein Tech) was incubated at a 1:50 ratio, CILP1 (Novus Biologicals) at a 1:25 ratio, LTBP3 (Santa Cruz at a 1:25 ratio, and Fbln5 (abcam) at a 1:500 ratio. Secondary antibodies were applied in ratios of 1:300 Fluor-conjugated secondary antibodies were purchased from Jackson ImmunoResearch (West Grove, PA). Imaging was performed on the Leica TCS SP5 AOBS Confocal Microscope System (Leica Microsystems Inc., Exton, PA).

### **Staining:**

Hearts were isolated and processed as described previously.<sup>2</sup> Movat's Pentachrome stain (Polyscientific R&D) was used to assess ECM organization as previously described.<sup>3</sup>

**Proteomic Analysis:** Aortic valve cusps were dissected as previously described,<sup>4</sup> with attention to eliminating cellular contamination from the aortic wall. Quantification using bicinchoninic acid assay showed an average of  $111 \pm 14$   $\mu\text{g}$  protein from 10 sets of AV (3 cusps per set). A total of 60  $\mu\text{g}$  of protein extracted from microdissected AV was loaded onto a 12% Bis-Tris minigel (Invitrogen, Carlsbad, CA). Electrophoresis was performed for 15 minutes at 150 volts using MOPS-SDS running buffer, until the 250 kDa protein molecular weight marker was observed at approximately 0.4 cm below the well. Gels were washed in ice-cold water for 10 minutes and briefly stained (SimplyBlue SafeStain,

Invitrogen, Grand Island NY) to visualize the protein bands. Each lane (length ~1.8 cm) was minced into 1 mm cubes. Gel cubes were treated by in-gel digestion, followed by peptide extraction using established protocols.<sup>5 6</sup>

Peptides were analyzed in triplicate via Multidimensional Protein Information Technology (MudPIT). Peptides were pressure cell loaded onto a biphasic pre-column fritted using an Upchurch M-520 filter union. The 150- $\mu$ m fused silica microcapillary column was packed with 4 cm of 5- $\mu$ m C18 reverse-phase resin (Jupiter, Phenomenex) followed by 4 cm of strong cation-exchange resin (Luna SCX, Phenomenex). Once loaded, it was placed in-line with a 100  $\mu$ m  $\times$  20 cm, C18 packed emitter tip column (Jupiter C18, 3  $\mu$ m, 300 Å, Phenomenex) an Eksigent NanoLC-1D plus HPLC pump. Multidimensional separation was accomplished using 5  $\mu$ l pulses of ammonium acetate in 0.1% formic acid (25, 50, 75, 100, 150, 200, 250, 300, 500, 750, 1000 mM) each followed by a 115 min reversed phase gradient from water 0.1% formic acid to 40% ACN 0.1% formic acid. Peptides eluted directly from the analytical column into the LTQ ion trap (Thermo Scientific, Inc., San Jose, CA). Each full MS scan ( $m/z$  range 350 – 1800) was followed by nine MS/MS events on the most abundant peaks. Dynamic exclusion was enabled with an exclusion list size of 150 and a duration of 60 s.

**Proteomic processing and data analysis.** MS/MS data were searched using both Sequest and Mascot against a concatenated Uniprot mouse database (downloaded 08/2013) with a fixed modification of carbamidomethylation, due to chemical reduction of the cysteine bonds required for tryptic access, and variable modifications of deamidation (N, Q) and oxidation (M), common chemical modifications that may occur during gel running and peptide extraction and are indistinguishable from biological

occurrence.<sup>6,7</sup> Peptides were clustered using ProteoIQ (version 2.5.0.1) at a protein level false discovery rate of  $\leq 1\%$ , a peptide probability of 0.95, and unique peptide count per protein in at least one group  $\geq 2$ . Significantly altered proteins were determined based on evaluation of comparative populations using 1) total spectral counts in one or more groups greater than 5; 2) t-test with *p*-value cutoffs of  $\leq 0.05$ ; 3) ratios of  $\geq 2$ -fold between one or more groups. These species were included in analysis of regulated networks.

**Bioinformatic analysis.** Pathways were calculated using WebGestalt enriching against KEGG and Wikipathways using a threshold of two fold enrichment, *p*-value  $\leq 1.0\text{E-}3$  as a cutoff point.<sup>8</sup> Reference set was the mouse genome using the hypergeometric statistical method and allowing for multiple testing using the Bonferroni-Hochberg correction.<sup>9</sup> Expression levels with gene symbols were input into Ingenuity Pathways Analysis (IPA, QIAGEN Redwood City, [www.qiagen.com/ingenuity](http://www.qiagen.com/ingenuity)) v24390178 build 346717 to evaluate enrichment of biological functions and processes. A Comparison Analysis was used to calculate functions for each total proteome, filtered using a negative log *p*-value cutoff  $\leq 3$  as a threshold. ToppCluster was used to calculate functions and processes of subsets with hypergeometric testing and allowing for Bonferroni adjustment of *p*-value.<sup>10</sup> Data were visualized using IPA or the TM4 Microarray Software Suite.<sup>11</sup>

**Target Networks.** The target network for EMILIN1-TGFB1 interaction was built in Ingenuity. ECM proteins that had a significant alteration in any proteomic group comparison were used. Molecules were added manually to Ingenuity and the Build function “Connect” was used to connect interactions between proteins using settings of

all species, all diseases, all biofluids, and disclosing any chemical or microRNA interactions (under Nodes). MicroRNA interactions were disclosed under data sources. An additional search was done using STRING<sup>12</sup> for each protein, using mouse as the species, with up to 20 interactions, and using confidence levels of 0.8 to allow predicted interactions based on gene neighborhood, gene fusion, and gene co-occurrence and well as using text mining, co-expression studies and protein homology to find relationships between molecules from curated databases.

## References

1. Dupuis, L.E. and Kern, C.B., Small leucine-rich proteoglycans exhibit unique spatiotemporal expression profiles during cardiac valve development. *Developmental Dynamics*, 243(4): 601-611, 2014.
2. Munjal, C. et al., Tgf- $\beta$  mediates early angiogenesis and latent fibrosis in an emilin1-deficient mouse model of aortic valve disease. *Disease Models & Mechanisms*, 7(8): 987-996, 2014.
3. Hinton Jr, R.B. et al., Extracellular matrix remodeling and organization in developing and diseased aortic valves. *Circulation Research*, 98(11): 1431-1438, 2006.
4. Krishnamurthy, V.K., Guilak, F., Narmoneva, D.A. and Hinton, R.B., Regional structure–function relationships in mouse aortic valve tissue. *Journal of Biomechanics*, 44(1): 77-83, 2011.
5. Angel, P.M. et al., Networked-based characterization of extracellular matrix proteins from adult mouse pulmonary and aortic valves. *Journal of Proteome Research*, 10(2): 812-823, 2011.
6. Shevchenko, A., Tomas, H., Havli, J., Olsen, J.V. and Mann, M., In-gel digestion for mass spectrometric characterization of proteins and proteomes. *Nature Protocols*, 1(6): 2856-2860, 2006.
7. Krokhin, O.V., Antonovici, M., Ens, W., Wilkins, J.A. and Standing, K.G., Deamidation of asn-gly-sequences during sample preparation for proteomics: Consequences for maldi and hplc-maldi analysis. *Analytical Chemistry*, 78(18): 6645-6650, 2006.
8. Duncan, D., Prodduturi, N. and Zhang, B., Webgestalt2: An updated and expanded version of the web-based gene set analysis toolkit. *BMC Bioinformatics*, 11(Suppl 4): P10, 2010.
9. Benjamini, Y. and Hochberg, Y., Controlling the false discovery rate: A practical and powerful approach to multiple testing. *Journal of the Royal Statistical Society. Series B (Methodological)*, 57(1): 289-300, 1995.
10. Kaimal, V., Bardes, E.E., Tabar, S.C., Jegga, A.G. and Aronow, B.J., Toppcluster: A multiple gene list feature analyzer for comparative enrichment clustering and network-based dissection of biological systems. *Nucleic acids research*, 38(Web Server issue): W96–W102, 2010.
11. Saeed, A.I. et al., Tm4 microarray software suite. *Methods in Enzymology*, 411: 134-193, 2006.

12. Szklarczyk, D. et al., String: Known and predicted protein–protein associations, integrated over the tree of life. *Nucleic Acids Research*, 43: D447-D452. PMID: PMC4383874., 2015.

The **Figure\_6\_ECM\_Proteomics\_Summarized** summarizes quantitative aspects and trends in ECM proteins involved in the EMILIN1-TGFB1 network.

The **Table\_MASTER\_PROTEOMICS\_QUALITATIVE** reports descriptive proteomic data such as protein length, isoelectric point, sequence coverage for each proteome and each replicate, probabilities associated with each protein group number of peptides overall (referred to as "Peptides", Total number of non-redundant peptides matched, counting multiple matches to peptides with the same primary sequence (despite different charge states or modifications) as "Nonredundant". Protein group probabilities and protein probabilities are reported for each replicate, along with number of peptides.

The **Table\_MASTER\_PROTEOMICS\_QUANTITATIVE** reports total spectral counts per proteome, spectral counts per replicate, fold change ratios. Results of t-test less than the cutoff p-value of 0.05 are highlighted in pink.

**Supplement Table 1A. Functions.** Full details are available as excel files of each function from authors.

*Functions represented in Figure 3A, calculated as described in text.*  
*ns= not significant, <-log p-value 3.0*  
*Functions are represented by negative Log p-value*

© 2000-2015 QIAGEN. All rights reserved.

Diseases and Bio Functions

|                                     | AdWT  | AgWT  | AdEM  | AgEM  |
|-------------------------------------|-------|-------|-------|-------|
| fibrogenesis                        | ns    | 22.76 | 26.89 | 25.77 |
| angiogenesis                        | 21.24 | 25.54 | 25.45 | 23.26 |
| binding of cells                    | 19.16 | 22.81 | 22.59 | 21.26 |
| cell movement of phagocytes         | 11.59 | 12.94 | 12.02 | 14.31 |
| quantity of carbohydrate            | 9.69  | 11.57 | 14.01 | 14.11 |
| formation of myofibrils             | 10.01 | 9.96  | 11.26 | 12.30 |
| quantity of focal adhesions         | 10.15 | 12.97 | 12.90 | 11.95 |
| adhesion of endothelial cells       | 8.19  | 8.61  | 10.49 | 10.70 |
| metabolism of carbohydrate          | 8.70  | 9.40  | 11.71 | 10.56 |
| inflammatory response               | 8.01  | 10.16 | 9.87  | 10.34 |
| adhesion of immune cells            | ns    | ns    | 8.84  | 10.33 |
| cell movement of neutrophils        | ns    | ns    | 8.78  | 9.87  |
| quantity of connective tissue       | ns    | ns    | 9.61  | 9.17  |
| morphology of cardiovascular tissue | ns    | ns    | ns    | 8.32  |

**Supplement Table 1B. Pathways. Full details are available as excel files from authors.**

---

*Pathways calculation represented in Figure 3B . Pathways were calculated as described in text.*

*Pathways were selected from total output based on relevance to heart valve biology*

*KEGG and Wikipathways are reported for each proteome.*

---

Pathways are represented by negative Log p-value

| Pathways |                          | WtY   | WtA   | EmY   | EmA   |
|----------|--------------------------|-------|-------|-------|-------|
| KEGG     | Focal Adhesion           | 65.20 | 66.60 | 63.50 | 62.88 |
| KEGG     | ECM-receptor Interaction | 43.20 | 38.87 | 40.79 | 38.29 |
| Wiki     | EGFR1 Signaling          | 14.79 | 16.73 | 22.54 | 22.54 |
| KEGG     | PPAR Signaling           | 16.03 | 17.93 | 18.86 | 20.23 |
| KEGG     | Insulin Signaling        | 12.80 | 11.14 | 15.73 | 15.96 |
| KEGG     | Calcium Signaling        | 12.94 | 14.68 | 13.15 | 13.40 |
| KEGG     | MAPK Signaling           | 6.20  | 6.33  | 8.61  | 8.61  |
| KEGG     | TGF Beta Signaling       | 7.87  | 7.53  | 6.81  | 7.71  |
| KEGG     | Wnt Signaling            | 10.76 | 7.84  | 8.91  | 7.70  |
| KEGG     | N-Glycan Biosynthesis    | 6.63  | 6.99  | 8.32  | 7.44  |
| Wiki     | Inflammatory Response    | 6.96  | 7.28  | 6.80  | 5.84  |
| KEGG     | Apoptosis                | 0.00  | 4.00  | 4.60  | 4.03  |
| KEGG     | VEGF Signaling           | 3.39  | 5.02  | 0.00  | 4.00  |
| KEGG     | mTOR Signaling           | 0.00  | 0.00  | 0.00  | 3.10  |































Table MASTER\_PROTEOMICS\_QUANTITATIVE

| Source      | Sequence ID            | Sequence Name                | Gene Symbol                  | Ratio<br>AEM/AGWT | Ratio<br>AGWT/AGWT | Ratio<br>AEM/ABEM | Ratio<br>AGWT/ABEM | Log Ratio<br>AEM/ABEM | Log Ratio<br>AGWT/ABEM | Log Ratio<br>AEM/ABEM | Log Ratio<br>AGWT/ABEM | p-value<br>AEM/ABEM | p-value<br>AGWT/ABEM | p-value<br>AEM/ABEM | p-value<br>AGWT/ABEM | AdEM Total<br>Spectral Count | AgEM Total<br>Spectral Count | AdWT Total<br>Spectral Count | AgWT Total<br>Spectral Count | AdEMrep1<br>Normalized SC | AdEMrep2<br>Normalized SC | AdEMrep3<br>Normalized SC | AgEMrep1<br>Normalized SC | AgEMrep2<br>Normalized SC | AgEMrep3<br>Normalized SC | AdWTrep1<br>Normalized SC | AdWTrep2<br>Normalized SC | AdWTrep3<br>Normalized SC | AgWTrep1<br>Normalized SC | AgWTrep2<br>Normalized SC | AgWTrep3<br>Normalized SC |
|-------------|------------------------|------------------------------|------------------------------|-------------------|--------------------|-------------------|--------------------|-----------------------|------------------------|-----------------------|------------------------|---------------------|----------------------|---------------------|----------------------|------------------------------|------------------------------|------------------------------|------------------------------|---------------------------|---------------------------|---------------------------|---------------------------|---------------------------|---------------------------|---------------------------|---------------------------|---------------------------|---------------------------|---------------------------|---------------------------|
| TOP PROTEIN | 01Q6408(CPL1_MOUSE     | Centriole Intermediate       | Ctip                         | 0.06              | 0.10               | 1.33              | 0.78               | -1.26                 | 1.02                   | 0.12                  | 0.11                   | 0.003               | 0.000                | 0.643               | 0.238                | 3                            | 4                            | 54                           | 42                           | 0                         | 2                         | 1                         | 1                         | 17                        | 23                        | 14                        | 16                        | 12                        | 14                        |                           |                           |
| TOP PROTEIN | 01Q4101(TNFRSF1_MOUSE  | CD45                         | Itih1                        | 0.01              | 0.01               | 7.00              | 0.00               | NA                    | 0.00                   | 0.00                  | 0.00                   | 0.000               | 0.000                | 0.368               | 0.000                | 4                            | 28                           | 313                          | 219                          | 0                         | 0                         | 0                         | 0                         | 159                       | 71                        | 37                        | 37                        | 30                        |                           |                           |                           |
| TOP PROTEIN | 01Q9941(LIML1_MOUSE    | Emulin A1                    | Emiln1                       | 0.00              | 0.00               | NA                | 0.66               | NA                    | NA                     | NA                    | -0.18                  | 0.006               | 0.000                | NA                  | 0.153                | 0                            | 0                            | 152                          | 100                          | 0                         | 0                         | 0                         | 0                         | 49                        | 68                        | 35                        | 33                        | 37                        |                           |                           |                           |
| TOP PROTEIN | 01F4803(ANKK1_MOUSE    | Annexin A5                   | Ankln1                       | 1.41              | 0.70               | 1.23              | 2.48               | 0.15                  | 0.16                   | 0.09                  | 0.09                   | 0.046               | 0.012                | 0.016               | 0.002                | 79                           | 97                           | 36                           | 139                          | 27                        | 25                        | 27                        | 31                        | 15                        | 35                        | 14                        | 23                        | 19                        | 51                        | 47                        | 43                        |
| TOP PROTEIN | 01C0072(C11orf10_MOUSE | Unlabeled protein containing | Unlabeled protein containing | 4.14              | 1.64               | 1.12              | 1.00               | 0.11                  | 0.19                   | 0.00                  | 0.00                   | 0.000               | 0.000                | 0.000               | 0.000                | 19                           | 10                           | 177                          | 102                          | 0                         | 0                         | 0                         | 0                         | 12                        | 15                        | 15                        | 15                        | 15                        | 15                        | 15                        |                           |
| TOP PROTEIN | 01Q7204(SH3L_MOUSE     | Sarcoplasmic                 | Sprb                         | 0.47              | 0.93               | 1.59              | 0.80               | -0.33                 | -0.03                  | 0.20                  | 0.10                   | 0.002               | 0.028                | 0.061               | 0.045                | 87                           | 138                          | 185                          | 148                          | 30                        | 25                        | 32                        | 55                        | 49                        | 34                        | 54                        | 63                        | 68                        | 50                        | 51                        | 47                        |
| TOP PROTEIN | 01P5640(ATH1_MOUSE     | ATP synthase subunit         | Atf1                         | 0.52              | 0.79               | 1.31              | 0.87               | -0.28                 | 0.10                   | 0.12                  | 0.06                   | 0.005               | 0.122                | 0.195               | 0.169                | 168                          | 1241                         | 1621                         | 2864                         | 2003                      | 360                       | 468                       | 413                       | 685                       | 504                       | 432                       | 723                       | 734                       | 907                       | 688                       | 696                       |
| TOP PROTEIN | 01C0833(C11orf10_MOUSE | Unlabeled protein containing | Unlabeled protein containing | 4.14              | 1.64               | 1.12              | 1.00               | 0.11                  | 0.19                   | 0.00                  | 0.00                   | 0.000               | 0.000                | 0.000               | 0.000                | 19                           | 10                           | 177                          | 102                          | 0                         | 0                         | 0                         | 0                         | 12                        | 15                        | 15                        | 15                        | 15                        | 15                        | 15                        | 15                        |
| TOP PROTEIN | 01Q9971(DGIR1_MOUSE    | Rho GTP-dissociation         | Arhgef12                     | 3.25              | 1.25               | 0.59              | 2.00               | 0.63                  | 0.10                   | -0.23                 | 0.30                   | 0.010               | 0.519                | 0.135               | 0.047                | 17                           | 10                           | 4                            | 8                            | 4                         | 7                         | 6                         | 2                         | 3                         | 5                         | 1                         | 1                         | 2                         | 3                         | 2                         | 3                         |
| TOP PROTEIN | 01F4804(ANKK1_MOUSE    | Rib protein nucleotide b     | Ankln1                       | 4.50              | NA                 | 1.00              | 0.00               | 0.54                  | NA                     | 0.00                  | NA                     | 0.024               | 0.124                | 1.000               | 0.116                | 7                            | 7                            | 2                            | 0                            | 2                         | 2                         | 3                         | 0                         | 4                         | 3                         | 0                         | 1                         | 1                         | 0                         | 0                         | 0                         |
| TOP PROTEIN | 01C0849(ANKK1_MOUSE    | Rib protein nucleotide b     | Ankln1                       | 4.50              | NA                 | 1.00              | 0.00               | 0.54                  | NA                     | 0.00                  | NA                     | 0.024               | 0.124                | 1.000               | 0.116                | 7                            | 7                            | 2                            | 0                            | 2                         | 2                         | 3                         | 0                         | 4                         | 3                         | 0                         | 1                         | 1                         | 0                         | 0                         | 0                         |
| TOP PROTEIN | 01C0849(ANKK1_MOUSE    | Rib protein nucleotide b     | Ankln1                       | 4.50              | NA                 | 1.00              | 0.00               | 0.54                  | NA                     | 0.00                  | NA                     | 0.024               | 0.124                | 1.000               | 0.116                | 7                            | 7                            | 2                            | 0                            | 2                         | 2                         | 3                         | 0                         | 4                         | 3                         | 0                         | 1                         | 1                         | 0                         | 0                         | 0                         |
| TOP PROTEIN | 01C0849(ANKK1_MOUSE    | Rib protein nucleotide b     | Ankln1                       | 4.50              | NA                 | 1.00              | 0.00               | 0.54                  | NA                     | 0.00                  | NA                     | 0.024               | 0.124                | 1.000               | 0.116                | 7                            | 7                            | 2                            | 0                            | 2                         | 2                         | 3                         | 0                         | 4                         | 3                         | 0                         | 1                         | 1                         | 0                         | 0                         | 0                         |
| TOP PROTEIN | 01C0849(ANKK1_MOUSE    | Rib protein nucleotide b     | Ankln1                       | 4.50              | NA                 | 1.00              | 0.00               | 0.54                  | NA                     | 0.00                  | NA                     | 0.024               | 0.124                | 1.000               | 0.116                | 7                            | 7                            | 2                            | 0                            | 2                         | 2                         | 3                         | 0                         | 4                         | 3                         | 0                         | 1                         | 1                         | 0                         | 0                         | 0                         |
| TOP PROTEIN | 01C0849(ANKK1_MOUSE    | Rib protein nucleotide b     | Ankln1                       | 4.50              | NA                 | 1.00              | 0.00               | 0.54                  | NA                     | 0.00                  | NA                     | 0.024               | 0.124                | 1.000               | 0.116                | 7                            | 7                            | 2                            | 0                            | 2                         | 2                         | 3                         | 0                         | 4                         | 3                         | 0                         | 1                         | 1                         | 0                         | 0                         | 0                         |
| TOP PROTEIN | 01C0849(ANKK1_MOUSE    | Rib protein nucleotide b     | Ankln1                       | 4.50              | NA                 | 1.00              | 0.00               | 0.54                  | NA                     | 0.00                  | NA                     | 0.024               | 0.124                | 1.000               | 0.116                | 7                            | 7                            | 2                            | 0                            | 2                         | 2                         | 3                         | 0                         | 4                         | 3                         | 0                         | 1                         | 1                         | 0                         | 0                         | 0                         |
| TOP PROTEIN | 01C0849(ANKK1_MOUSE    | Rib protein nucleotide b     | Ankln1                       | 4.50              | NA                 | 1.00              | 0.00               | 0.54                  | NA                     | 0.00                  | NA                     | 0.024               | 0.124                | 1.000               | 0.116                | 7                            | 7                            | 2                            | 0                            | 2                         | 2                         | 3                         | 0                         | 4                         | 3                         | 0                         | 1                         | 1                         | 0                         | 0                         | 0                         |
| TOP PROTEIN | 01C0849(ANKK1_MOUSE    | Rib protein nucleotide b     | Ankln1                       | 4.50              | NA                 | 1.00              | 0.00               | 0.54                  | NA                     | 0.00                  | NA                     | 0.024               | 0.124                | 1.000               | 0.116                | 7                            | 7                            | 2                            | 0                            | 2                         | 2                         | 3                         | 0                         | 4                         | 3                         | 0                         | 1                         | 1                         | 0                         | 0                         | 0                         |
| TOP PROTEIN | 01C0849(ANKK1_MOUSE    | Rib protein nucleotide b     | Ankln1                       | 4.50              | NA                 | 1.00              | 0.00               | 0.54                  | NA                     | 0.00                  | NA                     | 0.024               | 0.124                | 1.000               | 0.116                | 7                            | 7                            | 2                            | 0                            | 2                         | 2                         | 3                         | 0                         | 4                         | 3                         | 0                         | 1                         | 1                         | 0                         | 0                         | 0                         |
| TOP PROTEIN | 01C0849(ANKK1_MOUSE    | Rib protein nucleotide b     | Ankln1                       | 4.50              | NA                 | 1.00              | 0.00               | 0.54                  | NA                     | 0.00                  | NA                     | 0.024               | 0.124                | 1.000               | 0.116                | 7                            | 7                            | 2                            | 0                            | 2                         | 2                         | 3                         | 0                         | 4                         | 3                         | 0                         | 1                         | 1                         | 0                         | 0                         | 0                         |
| TOP PROTEIN | 01C0849(ANKK1_MOUSE    | Rib protein nucleotide b     | Ankln1                       | 4.50              | NA                 | 1.00              | 0.00               | 0.54                  | NA                     | 0.00                  | NA                     | 0.024               | 0.124                | 1.000               | 0.116                | 7                            | 7                            | 2                            | 0                            | 2                         | 2                         | 3                         | 0                         | 4                         | 3                         | 0                         | 1                         | 1                         | 0                         | 0                         | 0                         |
| TOP PROTEIN | 01C0849(ANKK1_MOUSE    | Rib protein nucleotide b     | Ankln1                       | 4.50              | NA                 | 1.00              | 0.00               | 0.54                  | NA                     | 0.00                  | NA                     | 0.024               | 0.124                | 1.000               | 0.116                | 7                            | 7                            | 2                            | 0                            | 2                         | 2                         | 3                         | 0                         | 4                         | 3                         | 0                         | 1                         | 1                         | 0                         | 0                         | 0                         |
| TOP PROTEIN | 01C0849(ANKK1_MOUSE    | Rib protein nucleotide b     | Ankln1                       | 4.50              | NA                 | 1.00              | 0.00               | 0.54                  | NA                     | 0.00                  | NA                     | 0.024               | 0.124                | 1.000               | 0.116                | 7                            | 7                            | 2                            | 0                            | 2                         | 2                         | 3                         | 0                         | 4                         | 3                         | 0                         | 1                         | 1                         | 0                         | 0                         | 0                         |
| TOP PROTEIN | 01C0849(ANKK1_MOUSE    | Rib protein nucleotide b     | Ankln1                       | 4.50              | NA                 | 1.00              | 0.00               | 0.54                  | NA                     | 0.00                  | NA                     | 0.024               | 0.124                | 1.000               | 0.116                | 7                            | 7                            | 2                            | 0                            | 2                         | 2                         | 3                         | 0                         | 4                         | 3                         | 0                         | 1                         | 1                         | 0                         | 0                         | 0                         |
| TOP PROTEIN | 01C0849(ANKK1_MOUSE    | Rib protein nucleotide b     | Ankln1                       | 4.50              | NA                 | 1.00              | 0.00               | 0.54                  | NA                     | 0.00                  | NA                     | 0.024               | 0.124                | 1.000               | 0.116                | 7                            | 7                            | 2                            | 0                            | 2                         | 2                         | 3                         | 0                         | 4                         | 3                         | 0                         | 1                         | 1                         | 0                         | 0                         | 0                         |
| TOP PROTEIN | 01C0849(ANKK1_MOUSE    | Rib protein nucleotide b     | Ankln1                       | 4.50              | NA                 | 1.00              | 0.00               | 0.54                  | NA                     | 0.00                  | NA                     | 0.024               | 0.124                | 1.000               | 0.116                | 7                            | 7                            | 2                            | 0                            | 2                         | 2                         | 3                         | 0                         | 4                         | 3                         | 0                         | 1                         | 1                         | 0                         | 0                         | 0                         |
| TOP PROTEIN | 01C0849(ANKK1_MOUSE    | Rib protein nucleotide b     | Ankln1                       | 4.50              | NA                 | 1.00              | 0.00               | 0.54                  | NA                     | 0.00                  | NA                     | 0.024               | 0.124                | 1.000               | 0.116                | 7                            | 7                            | 2                            | 0                            | 2                         | 2                         | 3                         | 0                         | 4                         | 3                         | 0                         | 1                         | 1                         | 0                         | 0                         | 0                         |
| TOP PROTEIN | 01C0849(ANKK1_MOUSE    | Rib protein nucleotide b     | Ankln1                       | 4.50              | NA                 | 1.00              | 0.00               | 0.54                  | NA                     | 0.00                  | NA                     | 0.024               | 0.124                | 1.000               | 0.116                | 7                            | 7                            | 2                            | 0                            | 2                         | 2                         | 3                         | 0                         | 4                         | 3                         | 0                         | 1                         | 1                         | 0                         | 0                         | 0                         |
| TOP PROTEIN | 01C0849(ANKK1_MOUSE    | Rib protein nucleotide b     | Ankln1                       | 4.50              | NA                 | 1.00              | 0.00               | 0.54                  | NA                     | 0.00                  | NA                     | 0.024               | 0.124                | 1.000               | 0.116                | 7                            | 7                            | 2                            | 0                            | 2                         | 2                         | 3                         | 0                         | 4                         | 3                         | 0                         | 1                         | 1                         | 0                         | 0                         | 0                         |
| TOP PROTEIN | 01C0849(ANKK1_MOUSE    | Rib protein nucleotide b     | Ankln1                       | 4.50              | NA                 | 1.00              | 0.00               | 0.54                  | NA                     | 0.00                  | NA                     | 0.024               | 0.124                | 1.000               | 0.116                | 7                            | 7                            | 2                            | 0                            | 2                         | 2                         | 3                         | 0                         | 4                         | 3                         | 0                         | 1                         | 1                         | 0                         | 0                         | 0                         |
| TOP PROTEIN | 01C0849(ANKK1_MOUSE    | Rib protein nucleotide b     | Ankln1                       | 4.50              | NA                 | 1.00              | 0.00               | 0.54                  | NA                     | 0.00                  | NA                     | 0.024               | 0.124                | 1.000               | 0.116                | 7                            | 7                            | 2                            | 0                            | 2                         | 2                         | 3                         | 0                         | 4                         | 3                         | 0                         | 1                         | 1                         | 0                         | 0                         | 0                         |
| TOP PROTEIN | 01C0849(ANKK1_MOUSE    | Rib protein nucleotide b     | Ankln1                       | 4.50              | NA                 | 1.00              | 0.00               | 0.54                  | NA                     | 0.00                  | NA                     | 0.024               | 0.124                | 1.000               | 0.116                | 7                            | 7                            | 2                            | 0                            | 2                         | 2                         | 3                         | 0                         | 4                         | 3                         | 0                         | 1                         | 1                         | 0                         | 0                         | 0                         |
| TOP PROTEIN | 01C0849(ANKK1_MOUSE    | Rib protein nucleotide b     | Ankln1                       | 4.50              | NA                 | 1.00              | 0.00               | 0.54                  | NA                     | 0.00                  | NA                     | 0.024               | 0.124                | 1.000               | 0.116                | 7                            | 7                            | 2                            | 0                            | 2                         | 2                         | 3                         | 0                         | 4                         | 3                         | 0                         | 1                         | 1                         | 0                         | 0                         | 0                         |
| TOP PROTEIN | 01C0849(ANKK1_MOUSE    | Rib protein nucleotide b     | Ankln1                       | 4.50              | NA                 | 1.00              | 0.00               | 0.54                  | NA                     | 0.00                  | NA                     | 0.024               | 0.124                | 1.000               | 0.116                | 7                            | 7                            | 2                            | 0                            | 2                         | 2                         | 3                         | 0                         | 4                         | 3                         | 0                         | 1                         | 1                         | 0                         | 0                         | 0                         |
| TOP PROTEIN | 01C0849(ANKK1_MOUSE    | Rib protein nucleotide b     | Ankln1                       | 4.50              | NA                 | 1.00              | 0.00               | 0.54                  | NA                     | 0.00                  | NA                     | 0.024               | 0.124                | 1.000               | 0.116                | 7                            | 7                            | 2                            | 0                            | 2                         | 2                         | 3                         | 0                         | 4                         | 3                         | 0                         | 1                         | 1                         | 0                         | 0                         | 0                         |
| TOP PROTEIN | 01C0849(ANKK1_MOUSE    | Rib protein nucleotide b     | Ankln1                       | 4.50              | NA                 | 1.00              | 0.00               | 0.54                  | NA                     | 0.00                  | NA                     | 0.024               | 0.124                | 1.000               | 0.116                | 7                            | 7                            | 2                            | 0                            | 2                         | 2                         | 3                         | 0                         | 4                         | 3                         | 0                         | 1                         | 1                         | 0                         | 0                         | 0                         |
| TOP PROTEIN | 01C0849(ANKK1_MOUSE    | Rib protein nucleotide b     | Ankln1                       | 4.50              | NA                 | 1.00              | 0.00               | 0.54                  | NA                     | 0.00                  | NA                     | 0.024               | 0.124                | 1.000               | 0.116                | 7                            | 7                            | 2                            | 0                            | 2                         | 2                         | 3                         | 0                         | 4                         | 3                         | 0                         | 1                         | 1                         | 0                         | 0                         | 0                         |
| TOP PROTEIN | 01C0849(ANKK1_MOUSE    | Rib protein nucleotide b     | Ankln1                       | 4.50              | NA                 | 1.00              | 0.00               | 0.54                  | NA                     | 0.00                  | NA                     | 0.024               | 0.124                | 1.000               | 0.116                | 7                            | 7                            | 2                            | 0                            | 2                         | 2                         | 3                         | 0                         | 4                         | 3                         | 0                         | 1                         | 1                         | 0                         | 0                         | 0                         |
| TOP PROTEIN | 01C0849(ANKK1_MOUSE    | Rib protein nucleotide b     | Ankln1                       | 4.50              | NA                 | 1.00              | 0.00               | 0.54                  | NA                     | 0.00                  | NA                     | 0.024               | 0.124                | 1.000               | 0.116                | 7                            | 7                            | 2                            | 0                            | 2                         | 2                         | 3                         | 0                         | 4                         | 3                         | 0                         | 1                         | 1                         | 0                         | 0                         | 0                         |
| TOP PROTEIN | 01C0849(ANKK1_MOUSE    | Rib protein nucleotide b     | Ankln1                       | 4.50              | NA                 | 1.00              | 0.00               | 0.54                  | NA                     | 0.00                  | NA                     | 0.024               | 0.124                | 1.000               | 0.116                | 7                            | 7                            | 2                            | 0                            | 2                         | 2                         | 3                         | 0                         | 4                         | 3                         | 0                         | 1                         | 1                         | 0                         | 0                         | 0                         |
| TOP PROTEIN | 01C0849(ANKK1_MOUSE    | Rib protein nucleotide b     | Ankln1                       | 4.50              | NA                 | 1.00              | 0.00               | 0.54                  | NA                     | 0.00                  | NA                     | 0.024               | 0.124                | 1.000               | 0.116                | 7                            | 7                            | 2                            | 0                            | 2                         | 2                         | 3                         | 0                         | 4                         | 3                         | 0                         | 1                         | 1                         | 0                         | 0                         | 0                         |
| TOP PROTEIN | 01C0849(ANKK1_MOUSE    | Rib protein nucleotide b     | Ankln1                       | 4.50              | NA                 | 1.00              | 0.00               | 0.54                  | NA                     | 0.00                  | NA                     | 0.024               | 0.124                | 1.000               | 0.116                | 7                            | 7                            | 2                            | 0                            | 2                         | 2                         | 3                         | 0                         | 4                         | 3                         | 0                         | 1                         | 1                         | 0                         | 0                         | 0                         |
| TOP PROTEIN | 01C0849(ANKK1_MOUSE    | Rib protein nucleotide b     | Ankln1                       | 4.50              | NA                 | 1.00              | 0.00               | 0.54                  | NA                     | 0.00                  | NA                     | 0.024               | 0.124                | 1.000               | 0.116                | 7                            | 7                            | 2                            | 0                            | 2                         | 2                         | 3                         | 0                         | 4                         | 3                         | 0                         | 1                         | 1                         | 0                         | 0                         | 0                         |
| TOP PROTEIN | 01C0849(ANKK1_MOUSE    | Rib protein nucleotide b     | Ankln1                       | 4.50              | NA                 | 1.00              | 0.00               | 0.54                  | NA                     | 0.00                  | NA                     | 0.024               | 0.124                | 1.000               | 0.116                | 7                            | 7                            | 2                            | 0                            | 2                         | 2                         | 3                         | 0                         | 4                         | 3                         | 0                         | 1                         | 1                         | 0                         | 0                         | 0                         |
| TOP PROTEIN | 01C0849(ANKK1_MOUSE    | Rib protein nucleotide b     | Ankln1                       | 4.50              | NA                 | 1.00              | 0.00               | 0.54                  | NA                     | 0.00                  | NA                     | 0.024               | 0.124                | 1.000               | 0.116                | 7                            | 7                            | 2                            | 0                            | 2                         | 2                         | 3                         | 0                         | 4                         | 3                         | 0                         | 1                         | 1                         | 0                         | 0                         | 0                         |
| TOP PROTEIN | 01C0849(ANKK1_MOUSE    | Rib protein nucleotide b     | Ankln1                       | 4.50              | NA                 | 1.00              | 0.00               | 0.54                  | NA                     | 0.00                  | NA                     | 0.024               | 0.124                | 1.000               | 0.116                | 7                            | 7                            | 2                            | 0                            | 2                         | 2                         | 3                         | 0                         | 4                         | 3                         | 0                         | 1                         | 1                         | 0                         | 0                         | 0                         |
| TOP PROTEIN | 01C0849(ANKK1_MOUSE    | Rib protein nucleotide b     | Ankln1                       | 4.50              | NA                 | 1.00              | 0.00               | 0.54                  | NA                     | 0.00                  | NA                     | 0.024               | 0.124                | 1.000               | 0.116                | 7                            | 7                            | 2                            | 0                            | 2                         | 2                         | 3                         | 0                         | 4                         | 3                         | 0                         | 1                         | 1                         | 0                         | 0                         | 0                         |
| TOP PROTEIN | 01C0849(ANKK1_MOUSE    | Rib protein nucleotide b     | Ankln1                       | 4.50              | NA                 | 1.00              | 0.00               | 0.54                  | NA                     | 0.00                  | NA                     | 0.02                |                      |                     |                      |                              |                              |                              |                              |                           |                           |                           |                           |                           |                           |                           |                           |                           |                           |                           |                           |

| Source      | Sequence ID | Sequence Name | Gene Symbol              | Ratio     |           |           |           | Log Ratio |           |           |           | p-value | p-value | p-value | p-value | AdEM Total     | AgEM Total     | AdWT Total     | AgWT Total     | AdEMrep1   | AdEMrep2   | AdEMrep3   | AgEMrep1   | AgEMrep2   | AgEMrep3   | AdWTrep1   | AdWTrep2   | AdWTrep3   | AgWTrep1   | AgWTrep2   | AgWTrep3   |
|-------------|-------------|---------------|--------------------------|-----------|-----------|-----------|-----------|-----------|-----------|-----------|-----------|---------|---------|---------|---------|----------------|----------------|----------------|----------------|------------|------------|------------|------------|------------|------------|------------|------------|------------|------------|------------|------------|
|             |             |               |                          | AdEM/AdWT | AgEM/AgWT | AdEM/AdEM | AgWT/AgWT | AdEM/AdWT | AgEM/AgWT | AdEM/AdEM | AgWT/AgWT |         |         |         |         | Spectral Count | Spectral Count | Spectral Count | Spectral Count | Normalized |
| TOP PROTEIN | tj025010    | MYO1D_MOUSE   | Unconventional myosin I  | 1.24      | 1.97      | 0.97      | 0.61      | 0.10      | 0.29      | -0.01     | -0.21     | 0.349   | 0.038   | 0.874   | 0.099   | 49             | 39             | 30             | 30             | 16         | 22         | 24         | 20         | 25         | 14         | 11         | 22         | 12         | 10         | 10         |            |
|             |             |               |                          | 0.91      | 0.91      | 0.40      | 0.40      | 0.19      | 0.19      | -0.51     | -0.51     | 0.037   | 0.037   | 0.884   | 0.074   | 10             | 10             | 10             | 10             | 4.12       | 4.12       | 4.12       | 4.12       | 4.12       | 4.12       | 4.12       | 4.12       | 4.12       | 4.12       | 4.12       |            |
| TOP PROTEIN | tj060035    | ITIH4_MOUSE   | Protein of 2 inter alpha | 0.90      | 0.91      | 0.56      | 0.60      | -0.05     | -0.05     | -0.26     | -0.20     | 0.643   | 0.042   | 0.116   | 0.184   | 9              | 5              | 10             | 16             | 4          | 3          | 2          | 2          | 4          | 3          | 2          | 4          | 3          | 7          | 3          |            |
|             |             |               |                          | 0.82      | 1.79      | 1.19      | 0.55      | -0.09     | 0.25      | 0.08      | -0.26     | 0.242   | 0.049   | 0.330   | 0.034   | 36             | 43             | 44             | 24             | 11         | 12         | 13         | 11         | 14         | 18         | 16         | 17         | 11         | 9          | 9          |            |
| TOP PROTEIN | tj017333    | ITIM4_MOUSE   | Fibrinogen-like          | 1.36      | 1.33      | 0.60      | 0.60      | 0.13      | 0.13      | 0.26      | 0.26      | 0.13    | 0.13    | 0.374   | 0.26    | 11             | 11             | 11             | 11             | 6          | 6          | 6          | 6          | 6          | 6          | 6          | 6          | 6          | 6          | 6          |            |
|             |             |               |                          | 0.90      | 0.87      | 1.33      | 1.21      | -0.37     | -0.33     | 0.12      | 0.08      | 0.116   | 0.003   | 0.609   | 0.251   | 6              | 8              | 14             | 17             | 0          | 2          | 4          | 3          | 3          | 2          | 4          | 4          | 6          | 6          | 5          |            |
| TOP PROTEIN | tj007143    | IS27A_MOUSE   | Long-chain fatty acid    | 0.88      | 2.80      | 0.43      | 0.43      | -0.06     | 0.45      | 0.12      | -0.38     | 0.696   | 0.003   | 0.399   | 0.027   | 21             | 28             | 24             | 10             | 3          | 7          | 11         | 9          | 8          | 11         | 7          | 9          | 8          | 3          | 3          |            |
|             |             |               |                          | 1.75      | 2.17      | 0.67      | 0.67      | 0.43      | 0.43      | 0.12      | -0.38     | 0.696   | 0.003   | 0.399   | 0.027   | 21             | 28             | 24             | 10             | 3          | 7          | 11         | 9          | 8          | 11         | 7          | 9          | 8          | 3          | 3          |            |
| TOP PROTEIN | tj029674    | ISAB1_MOUSE   | Serine hydroxymethyl     | 0.99      | 2.60      | 1.44      | 0.38      | -0.16     | 0.41      | 0.16      | -0.41     | 0.275   | 0.023   | 0.329   | 0.005   | 9              | 13             | 13             | 5              | 5          | 2          | 2          | 5          | 5          | 3          | 5          | 4          | 4          | 2          | 1          |            |
|             |             |               |                          | 0.88      | 2.80      | 1.00      | 0.95      | -0.07     | 0.12      | 0.28      | -0.02     | 0.18    | 0.279   | 0.003   | 0.742   | 0.189          | 19             | 15             | 10             | 5          | 5          | 8          | 7          | 6          | 6          | 3          | 6          | 3          | 6          | 3          |            |
| TOP PROTEIN | tj021053    | ISD1_MOUSE    | Nucleic acid             | 1.21      | 2.67      | 0.58      | 0.58      | 0.21      | 0.58      | 0.09      | -0.09     | 0.009   | 0.009   | 0.167   | 0.009   | 12             | 10             | 10             | 10             | 12         | 12         | 12         | 12         | 12         | 12         | 12         | 12         | 12         | 12         | 12         | 12         |
|             |             |               |                          | 0.81      | 1.68      | 1.08      | 0.52      | -0.09     | 0.23      | 0.03      | -0.28     | 0.357   | 0.022   | 0.678   | 0.033   | 39             | 42             | 48             | 25             | 11         | 17         | 11         | 12         | 15         | 15         | 17         | 19         | 12         | 9          | 10         |            |
| TOP PROTEIN | tj028902    | ISG1A_MOUSE   | Interferon beta          | 0.96      | 2.67      | 1.48      | 0.54      | -0.02     | 0.43      | 0.17      | -0.27     | 0.904   | 0.013   | 0.187   | 0.070   | 27             | 40             | 28             | 15             | 5          | 11         | 11         | 11         | 15         | 17         | 12         | 11         | 6          | 11         | 4          |            |
|             |             |               |                          | 1.76      | 2.67      | 1.00      | 0.50      | 0.07      | 0.07      | 0.07      | -0.07     | 0.768   | 0.006   | 0.167   | 0.006   | 29             | 42             | 28             | 15             | 5          | 11         | 11         | 11         | 15         | 17         | 12         | 11         | 6          | 11         | 4          |            |
| TOP PROTEIN | tj028943    | ISG2_MOUSE    | Exportin-2               | 1.03      | 2.44      | 1.33      | 0.31      | 0.01      | 0.65      | 0.12      | -0.51     | 0.936   | 0.003   | 0.367   | 0.067   | 30             | 40             | 29             | 9              | 4          | 14         | 12         | 14         | 15         | 5          | 11         | 13         | 1          | 5          | 3          |            |
|             |             |               |                          | 0.75      | 0.48      | 0.83      | 1.63      | -0.12     | -0.41     | -0.08     | 0.21      | 0.692   | 0.005   | 0.643   | 0.326   | 6              | 5              | 8              | 13             | 2          | 3          | 1          | 2          | 1          | 2          | 0          | 5          | 3          | 5          | 4          |            |
| TOP PROTEIN | tj018074    | ISGAP2_MOUSE  | Adaptor                  | 1.03      | 2.44      | 1.33      | 0.31      | 0.01      | 0.65      | 0.12      | -0.51     | 0.936   | 0.003   | 0.367   | 0.067   | 30             | 40             | 29             | 9              | 4          | 14         | 12         | 14         | 15         | 5          | 11         | 13         | 1          | 5          | 3          |            |
|             |             |               |                          | 0.75      | 0.48      | 0.83      | 1.63      | -0.12     | -0.41     | -0.08     | 0.21      | 0.692   | 0.005   | 0.643   | 0.326   | 6              | 5              | 8              | 13             | 2          | 3          | 1          | 2          | 1          | 2          | 0          | 5          | 3          | 5          | 4          |            |
| TOP PROTEIN | tj018074    | ISGAP2_MOUSE  | Adaptor                  | 1.03      | 2.44      | 1.33      | 0.31      | 0.01      | 0.65      | 0.12      | -0.51     | 0.936   | 0.003   | 0.367   | 0.067   | 30             | 40             | 29             | 9              | 4          | 14         | 12         | 14         | 15         | 5          | 11         | 13         | 1          | 5          | 3          |            |
|             |             |               |                          | 0.75      | 0.48      | 0.83      | 1.63      | -0.12     | -0.41     | -0.08     | 0.21      | 0.692   | 0.005   | 0.643   | 0.326   | 6              | 5              | 8              | 13             | 2          | 3          | 1          | 2          | 1          | 2          | 0          | 5          | 3          | 5          | 4          |            |
| TOP PROTEIN | tj018074    | ISGAP2_MOUSE  | Adaptor                  | 1.03      | 2.44      | 1.33      | 0.31      | 0.01      | 0.65      | 0.12      | -0.51     | 0.936   | 0.003   | 0.367   | 0.067   | 30             | 40             | 29             | 9              | 4          | 14         | 12         | 14         | 15         | 5          | 11         | 13         | 1          | 5          | 3          |            |
|             |             |               |                          | 0.75      | 0.48      | 0.83      | 1.63      | -0.12     | -0.41     | -0.08     | 0.21      | 0.692   | 0.005   | 0.643   | 0.326   | 6              | 5              | 8              | 13             | 2          | 3          | 1          | 2          | 1          | 2          | 0          | 5          | 3          | 5          | 4          |            |
| TOP PROTEIN | tj018074    | ISGAP2_MOUSE  | Adaptor                  | 1.03      | 2.44      | 1.33      | 0.31      | 0.01      | 0.65      | 0.12      | -0.51     | 0.936   | 0.003   | 0.367   | 0.067   | 30             | 40             | 29             | 9              | 4          | 14         | 12         | 14         | 15         | 5          | 11         | 13         | 1          | 5          | 3          |            |
|             |             |               |                          | 0.75      | 0.48      | 0.83      | 1.63      | -0.12     | -0.41     | -0.08     | 0.21      | 0.692   | 0.005   | 0.643   | 0.326   | 6              | 5              | 8              | 13             | 2          | 3          | 1          | 2          | 1          | 2          | 0          | 5          | 3          | 5          | 4          |            |
| TOP PROTEIN | tj018074    | ISGAP2_MOUSE  | Adaptor                  | 1.03      | 2.44      | 1.33      | 0.31      | 0.01      | 0.65      | 0.12      | -0.51     | 0.936   | 0.003   | 0.367   | 0.067   | 30             | 40             | 29             | 9              | 4          | 14         | 12         | 14         | 15         | 5          | 11         | 13         | 1          | 5          | 3          |            |
|             |             |               |                          | 0.75      | 0.48      | 0.83      | 1.63      | -0.12     | -0.41     | -0.08     | 0.21      | 0.692   | 0.005   | 0.643   | 0.326   | 6              | 5              | 8              | 13             | 2          | 3          | 1          | 2          | 1          | 2          | 0          | 5          | 3          | 5          | 4          |            |
| TOP PROTEIN | tj018074    | ISGAP2_MOUSE  | Adaptor                  | 1.03      | 2.44      | 1.33      | 0.31      | 0.01      | 0.65      | 0.12      | -0.51     | 0.936   | 0.003   | 0.367   | 0.067   | 30             | 40             | 29             | 9              | 4          | 14         | 12         | 14         | 15         | 5          | 11         | 13         | 1          | 5          | 3          |            |
|             |             |               |                          | 0.75      | 0.48      | 0.83      | 1.63      | -0.12     | -0.41     | -0.08     | 0.21      | 0.692   | 0.005   | 0.643   | 0.326   | 6              | 5              | 8              | 13             | 2          | 3          | 1          | 2          | 1          | 2          | 0          | 5          | 3          | 5          | 4          |            |
| TOP PROTEIN | tj018074    | ISGAP2_MOUSE  | Adaptor                  | 1.03      | 2.44      | 1.33      | 0.31      | 0.01      | 0.65      | 0.12      | -0.51     | 0.936   | 0.003   | 0.367   | 0.067   | 30             | 40             | 29             | 9              | 4          | 14         | 12         | 14         | 15         | 5          | 11         | 13         | 1          | 5          | 3          |            |
|             |             |               |                          | 0.75      | 0.48      | 0.83      | 1.63      | -0.12     | -0.41     | -0.08     | 0.21      | 0.692   | 0.005   | 0.643   | 0.326   | 6              | 5              | 8              | 13             | 2          | 3          | 1          | 2          | 1          | 2          | 0          | 5          | 3          | 5          | 4          |            |
| TOP PROTEIN | tj018074    | ISGAP2_MOUSE  | Adaptor                  | 1.03      | 2.44      | 1.33      | 0.31      | 0.01      | 0.65      | 0.12      | -0.51     | 0.936   | 0.003   | 0.367   | 0.067   | 30             | 40             | 29             | 9              | 4          | 14         | 12         | 14         | 15         | 5          | 11         | 13         | 1          | 5          | 3          |            |
|             |             |               |                          | 0.75      | 0.48      | 0.83      | 1.63      | -0.12     | -0.41     | -0.08     | 0.21      | 0.692   | 0.005   | 0.643   | 0.326   | 6              | 5              | 8              | 13             | 2          | 3          | 1          | 2          | 1          | 2          | 0          | 5          | 3          | 5          | 4          |            |
| TOP PROTEIN | tj018074    | ISGAP2_MOUSE  | Adaptor                  | 1.03      | 2.44      | 1.33      | 0.31      | 0.01      | 0.65      | 0.12      | -0.51     | 0.936   | 0.003   | 0.367   | 0.067   | 30             | 40             | 29             | 9              | 4          | 14         | 12         | 14         | 15         | 5          | 11         | 13         | 1          | 5          | 3          |            |
|             |             |               |                          | 0.75      | 0.48      | 0.83      | 1.63      | -0.12     | -0.41     | -0.08     | 0.21      | 0.692   | 0.005   | 0.643   | 0.326   | 6              | 5              | 8              | 13             | 2          | 3          | 1          | 2          | 1          | 2          | 0          | 5          | 3          | 5          | 4          |            |
| TOP PROTEIN | tj018074    | ISGAP2_MOUSE  | Adaptor                  | 1.03      | 2.44      | 1.33      | 0.31      | 0.01      | 0.65      | 0.12      | -0.51     | 0.936   | 0.003   | 0.367   | 0.067   | 30             | 40             | 29             | 9              | 4          | 14         | 12         | 14         | 15         | 5          | 11         | 13         | 1          | 5          | 3          |            |
|             |             |               |                          | 0.75      | 0.48      | 0.83      | 1.63      | -0.12     | -0.41     | -0.08     | 0.21      | 0.692   | 0.005   | 0.643   | 0.326   | 6              | 5              | 8              | 13             | 2          | 3          | 1          | 2          | 1          | 2          | 0          | 5          | 3          | 5          | 4          |            |
| TOP PROTEIN | tj018074    | ISGAP2_MOUSE  | Adaptor                  | 1.03      | 2.44      | 1.33      | 0.31      | 0.01      | 0.65      | 0.12      | -0.51     | 0.936   | 0.003   | 0.367   | 0.067   | 30             | 40             | 29             | 9              | 4          | 14         | 12         | 14         | 15         | 5          | 11         | 13         | 1          | 5          | 3          |            |
|             |             |               |                          | 0.75      | 0.48      | 0.83      | 1.63      | -0.12     | -0.41     | -0.08     | 0.21      | 0.692   | 0.005   | 0.643   | 0.326   | 6              | 5              | 8              | 13             | 2          | 3          | 1          | 2          | 1          | 2          | 0          | 5          | 3          | 5          | 4          |            |
| TOP PROTEIN | tj018074    | ISGAP2_MOUSE  | Adaptor                  | 1.03      | 2.44      | 1.33      | 0.31      | 0.01      | 0.65      | 0.12      | -0.51     | 0.936   | 0.003   | 0.367   | 0.067   | 30             | 40             | 29             | 9              | 4          | 14         | 12         | 14         | 15         | 5          | 11         | 13         | 1          | 5          | 3          |            |
|             |             |               |                          | 0.75      | 0.48      | 0.83      | 1.63      | -0.12     | -0.41     | -0.08     | 0.21      | 0.692   | 0.005   | 0.643   | 0.326   | 6              | 5              | 8              | 13             | 2          | 3          | 1          | 2          | 1          | 2          | 0          | 5          | 3          | 5          | 4          |            |
| TOP PROTEIN | tj018074    | ISGAP2_MOUSE  | Adaptor                  | 1.03      | 2.44      | 1.33      | 0.31      | 0.01      | 0.65      | 0.12      | -0.51     | 0.936   | 0.003   | 0.367   | 0.067   | 30             | 40             | 29             | 9              | 4          | 14         | 12         | 14         | 15         | 5          | 11         | 13         | 1          | 5          | 3          |            |
|             |             |               |                          | 0.75      | 0.48      | 0.83      | 1.63      | -0.12     | -0.41     | -0.08     | 0.21      | 0.692   | 0.005   | 0.643   | 0.326   | 6              | 5              | 8              | 13             | 2          | 3          | 1          | 2          | 1          | 2          | 0          | 5          | 3          | 5          | 4          |            |
| TOP PROTEIN | tj018074    | ISGAP2_MOUSE  | Adaptor                  | 1.03      | 2.44      | 1.33      | 0.31      | 0.01      | 0.65      | 0.12      | -0.51     | 0.936   | 0.003   | 0.367   | 0.067   | 30             | 40             | 29             | 9              | 4          | 14         | 12         | 14         | 15         | 5          | 11         | 13         | 1          | 5          | 3          |            |
|             |             |               |                          |           |           |           |           |           |           |           |           |         |         |         |         |                |                |                |                |            |            |            |            |            |            |            |            |            |            |            |            |

|  |  |  |  |  |  |  |  |  |  |  |  |  |  |  |  |  |  |  |  |  |  |  |  |  |  |  |  |  |  |  |  |  |  |  |  |  |  |  |  |  |  |  |  |  |  |  |  |  |  |  |  |  |  |  |  |  |  |  |  |  |  |  |  |  |  |  |  |  |  |  |  |  |  |  |  |  |  |  |  |  |  |  |  |  |  |  |  |  |  |  |  |  |  |  |  |  |  |  |  |  |  |  |  |  |  |  |  |  |  |  |  |  |  |  |  |  |  |  |  |  |  |  |  |  |  |  |  |  |  |  |  |  |  |  |  |  |  |  |  |  |  |  |  |  |  |  |  |  |  |  |  |  |  |  |  |  |  |  |  |  |  |  |  |  |  |  |  |  |  |  |  |  |  |  |  |  |  |  |  |  |  |  |  |  |  |  |  |  |  |  |  |  |  |  |  |  |  |  |  |  |  |  |  |  |  |  |  |  |  |  |  |  |  |  |  |  |  |  |  |  |  |  |  |  |  |  |  |  |  |  |  |  |  |  |  |  |  |  |  |  |  |  |  |  |  |  |  |  |  |  |  |  |  |  |  |  |  |  |  |  |  |  |  |  |  |  |  |  |  |  |  |  |  |  |  |  |  |  |  |  |  |  |  |  |  |  |  |  |  |  |  |  |  |  |  |  |  |  |  |  |  |  |  |  |  |  |  |  |  |  |  |  |  |  |  |  |  |  |  |  |  |  |  |  |  |  |  |  |  |  |  |  |  |  |  |  |  |  |  |  |  |  |  |  |  |  |  |  |  |  |  |  |  |  |  |  |  |  |  |  |  |  |  |  |  |  |  |  |  |  |  |  |  |  |  |  |  |  |  |  |  |  |  |  |  |  |  |  |  |  |  |  |  |  |  |  |  |  |  |  |  |  |  |  |  |  |  |  |  |  |  |  |  |  |  |  |  |  |  |  |  |  |  |  |  |  |  |  |  |  |  |  |  |  |  |  |  |  |  |  |  |  |  |  |  |  |  |  |  |  |  |  |  |  |  |  |  |  |  |  |  |  |  |  |  |  |  |  |  |  |  |  |  |  |  |  |  |  |  |  |  |  |  |  |  |  |  |  |  |  |  |  |  |  |  |  |  |  |  |  |  |  |  |  |  |  |  |  |  |  |  |  |  |  |  |  |  |  |  |  |  |  |  |  |  |  |  |  |  |  |  |  |  |  |  |  |  |  |  |  |  |  |  |  |  |  |  |  |  |  |  |  |  |  |  |  |  |  |  |  |  |  |  |  |  |  |  |  |  |  |  |  |  |  |  |  |  |  |  |  |  |  |  |  |  |  |  |  |  |  |  |  |  |  |  |  |  |  |  |  |  |  |  |  |  |  |  |  |  |  |  |  |  |  |  |  |  |  |  |  |  |  |  |  |  |  |  |  |  |  |  |  |  |  |  |  |  |  |  |  |  |  |  |  |  |  |  |  |  |  |  |  |  |  |  |  |  |  |  |  |  |  |  |  |  |  |  |  |  |  |  |  |  |  |  |  |  |  |  |  |  |  |  |  |  |  |  |  |  |  |  |  |  |  |  |  |  |  |  |  |  |  |  |  |  |  |  |  |  |  |  |  |  |  |  |  |  |  |  |  |  |  |  |  |  |  |  |  |  |  |  |  |  |  |  |  |  |  |  |  |  |  |  |  |  |  |  |  |  |  |  |  |  |  |  |  |  |  |  |  |  |  |  |  |  |  |  |  |  |  |  |  |  |  |  |  |  |  |  |  |  |  |  |  |  |  |  |  |  |  |  |  |  |  |  |  |  |  |  |  |  |  |  |  |  |  |  |  |  |  |  |  |  |  |  |  |  |  |  |  |  |  |  |  |  |  |  |  |  |  |  |  |  |  |  |  |  |  |  |  |  |  |  |  |  |  |  |  |  |  |  |  |  |  |  |  |  |  |  |  |  |  |  |  |  |  |  |  |  |  |  |  |  |  |  |  |  |  |  |  |  |  |  |  |  |  |  |  |  |  |  |  |  |  |  |  |  |  |  |  |  |  |  |  |  |  |  |  |  |  |  |  |  |  |  |  |  |  |  |  |  |  |  |  |  |  |  |  |  |  |  |  |  |  |  |  |  |  |  |  |  |  |  |  |  |  |  |  |  |  |  |  |  |  |  |  |  |  |  |  |  |  |  |  |  |  |  |  |  |  |  |  |  |  |  |  |  |  |  |  |  |  |  |  |  |  |  |  |  |  |  |  |  |  |  |  |  |  |  |  |  |  |  |  |  |  |  |  |  |  |  |  |  |  |  |  |  |  |  |  |  |  |  |  |  |  |  |  |  |  |  |  |  |  |  |  |  |  |  |  |  |  |  |  |  |  |  |  |  |  |  |  |  |  |  |  |  |  |  |  |  |  |  |  |  |  |  |  |  |  |  |  |  |  |  |  |  |  |  |  |  |  |  |  |  |  |  |  |  |  |  |  |  |  |  |  |  |  |  |  |  |  |  |  |  |  |  |  |  |  |  |  |  |  |  |  |  |  |  |  |  |  |  |  |  |  |  |  |  |  |  |  |  |  |  |  |  |  |  |  |  |  |  |  |  |  |  |  |  |  |  |  |  |  |  |  |  |  |  |  |  |  |  |  |  |  |  |  |  |  |  |  |  |  |  |  |  |  |  |  |  |  |  |  |  |  |  |  |  |  |  |  |  |  |  |  |  |  |  |  |  |  |  |  |  |  |  |  |  |  |  |  |  |  |  |  |  |  |  |  |  |  |  |  |  |  |  |  |  |  |  |  |  |  |  |  |  |  |  |  |  |  |  |  |  |  |  |  |  |  |  |  |  |  |  |  |  |  |  |  |  |  |  |  |  |  |  |  |  |  |  |  |  |  |  |  |  |  |  |  |  |  |  |  |  |  |  |  |  |  |  |  |  |  |  |  |  |  |  |  |  |  |  |  |  |  |  |  |  |  |  |  |  |  |  |  |  |  |  |  |  |  |  |  |  |  |  |  |  |  |  |  |  |  |  |  |  |  |  |  |  |  |  |  |  |  |  |  |  |  |  |  |  |  |  |  |  |  |  |  |  |  |  |  |  |  |  |  |  |  |  |  |  |  |  |  |  |  |  |  |  |  |  |  |  |  |  |  |  |  |  |  |  |  |  |  |  |  |  |  |  |  |  |  |  |  |  |  |  |  |  |  |  |  |  |  |  |  |  |  |  |  |  |  |  |  |  |  |  |  |  |  |  |  |  |  |  |  |  |  |  |  |  |  |  |  |  |  |  |  |  |  |  |  |  |  |  |  |  |  |  |  |  |  |  |  |  |  |  |  |  |  |  |  |  |  |  |  |  |  |  |  |  |  |  |  |  |  |  |  |  |  |  |  |  |  |  |  |  |  |  |  |  |  |  |  |  |  |  |  |  |  |  |  |  |  |  |  |  |  |  |  |  |  |  |  |  |  |  | </ |
|--|--|--|--|--|--|--|--|--|--|--|--|--|--|--|--|--|--|--|--|--|--|--|--|--|--|--|--|--|--|--|--|--|--|--|--|--|--|--|--|--|--|--|--|--|--|--|--|--|--|--|--|--|--|--|--|--|--|--|--|--|--|--|--|--|--|--|--|--|--|--|--|--|--|--|--|--|--|--|--|--|--|--|--|--|--|--|--|--|--|--|--|--|--|--|--|--|--|--|--|--|--|--|--|--|--|--|--|--|--|--|--|--|--|--|--|--|--|--|--|--|--|--|--|--|--|--|--|--|--|--|--|--|--|--|--|--|--|--|--|--|--|--|--|--|--|--|--|--|--|--|--|--|--|--|--|--|--|--|--|--|--|--|--|--|--|--|--|--|--|--|--|--|--|--|--|--|--|--|--|--|--|--|--|--|--|--|--|--|--|--|--|--|--|--|--|--|--|--|--|--|--|--|--|--|--|--|--|--|--|--|--|--|--|--|--|--|--|--|--|--|--|--|--|--|--|--|--|--|--|--|--|--|--|--|--|--|--|--|--|--|--|--|--|--|--|--|--|--|--|--|--|--|--|--|--|--|--|--|--|--|--|--|--|--|--|--|--|--|--|--|--|--|--|--|--|--|--|--|--|--|--|--|--|--|--|--|--|--|--|--|--|--|--|--|--|--|--|--|--|--|--|--|--|--|--|--|--|--|--|--|--|--|--|--|--|--|--|--|--|--|--|--|--|--|--|--|--|--|--|--|--|--|--|--|--|--|--|--|--|--|--|--|--|--|--|--|--|--|--|--|--|--|--|--|--|--|--|--|--|--|--|--|--|--|--|--|--|--|--|--|--|--|--|--|--|--|--|--|--|--|--|--|--|--|--|--|--|--|--|--|--|--|--|--|--|--|--|--|--|--|--|--|--|--|--|--|--|--|--|--|--|--|--|--|--|--|--|--|--|--|--|--|--|--|--|--|--|--|--|--|--|--|--|--|--|--|--|--|--|--|--|--|--|--|--|--|--|--|--|--|--|--|--|--|--|--|--|--|--|--|--|--|--|--|--|--|--|--|--|--|--|--|--|--|--|--|--|--|--|--|--|--|--|--|--|--|--|--|--|--|--|--|--|--|--|--|--|--|--|--|--|--|--|--|--|--|--|--|--|--|--|--|--|--|--|--|--|--|--|--|--|--|--|--|--|--|--|--|--|--|--|--|--|--|--|--|--|--|--|--|--|--|--|--|--|--|--|--|--|--|--|--|--|--|--|--|--|--|--|--|--|--|--|--|--|--|--|--|--|--|--|--|--|--|--|--|--|--|--|--|--|--|--|--|--|--|--|--|--|--|--|--|--|--|--|--|--|--|--|--|--|--|--|--|--|--|--|--|--|--|--|--|--|--|--|--|--|--|--|--|--|--|--|--|--|--|--|--|--|--|--|--|--|--|--|--|--|--|--|--|--|--|--|--|--|--|--|--|--|--|--|--|--|--|--|--|--|--|--|--|--|--|--|--|--|--|--|--|--|--|--|--|--|--|--|--|--|--|--|--|--|--|--|--|--|--|--|--|--|--|--|--|--|--|--|--|--|--|--|--|--|--|--|--|--|--|--|--|--|--|--|--|--|--|--|--|--|--|--|--|--|--|--|--|--|--|--|--|--|--|--|--|--|--|--|--|--|--|--|--|--|--|--|--|--|--|--|--|--|--|--|--|--|--|--|--|--|--|--|--|--|--|--|--|--|--|--|--|--|--|--|--|--|--|--|--|--|--|--|--|--|--|--|--|--|--|--|--|--|--|--|--|--|--|--|--|--|--|--|--|--|--|--|--|--|--|--|--|--|--|--|--|--|--|--|--|--|--|--|--|--|--|--|--|--|--|--|--|--|--|--|--|--|--|--|--|--|--|--|--|--|--|--|--|--|--|--|--|--|--|--|--|--|--|--|--|--|--|--|--|--|--|--|--|--|--|--|--|--|--|--|--|--|--|--|--|--|--|--|--|--|--|--|--|--|--|--|--|--|--|--|--|--|--|--|--|--|--|--|--|--|--|--|--|--|--|--|--|--|--|--|--|--|--|--|--|--|--|--|--|--|--|--|--|--|--|--|--|--|--|--|--|--|--|--|--|--|--|--|--|--|--|--|--|--|--|--|--|--|--|--|--|--|--|--|--|--|--|--|--|--|--|--|--|--|--|--|--|--|--|--|--|--|--|--|--|--|--|--|--|--|--|--|--|--|--|--|--|--|--|--|--|--|--|--|--|--|--|--|--|--|--|--|--|--|--|--|--|--|--|--|--|--|--|--|--|--|--|--|--|--|--|--|--|--|--|--|--|--|--|--|--|--|--|--|--|--|--|--|--|--|--|--|--|--|--|--|--|--|--|--|--|--|--|--|--|--|--|--|--|--|--|--|--|--|--|--|--|--|--|--|--|--|--|--|--|--|--|--|--|--|--|--|--|--|--|--|--|--|--|--|--|--|--|--|--|--|--|--|--|--|--|--|--|--|--|--|--|--|--|--|--|--|--|--|--|--|--|--|--|--|--|--|--|--|--|--|--|--|--|--|--|--|--|--|--|--|--|--|--|--|--|--|--|--|--|--|--|--|--|--|--|--|--|--|--|--|--|--|--|--|--|--|--|--|--|--|--|--|--|--|--|--|--|--|--|--|--|--|--|--|--|--|--|--|--|--|--|--|--|--|--|--|--|--|--|--|--|--|--|--|--|--|--|--|--|--|--|--|--|--|--|--|--|--|--|--|--|--|--|--|--|--|--|--|--|--|--|--|--|--|--|--|--|--|--|--|--|--|--|--|--|--|--|--|--|--|--|--|--|--|--|--|--|--|--|--|--|--|--|--|--|--|--|--|--|--|--|--|--|--|--|--|--|--|--|--|--|--|--|--|--|--|--|--|--|--|--|--|--|--|--|--|--|--|--|--|--|--|--|--|--|--|--|--|--|--|--|--|--|--|--|--|--|--|--|--|--|--|--|--|--|--|--|--|--|--|--|--|--|--|--|--|--|--|--|--|--|--|--|--|--|--|--|--|--|--|--|--|--|--|--|--|--|--|--|--|--|--|--|--|--|--|--|--|--|--|--|--|--|--|--|--|--|--|--|--|--|--|--|--|--|--|--|--|--|--|--|--|--|--|--|--|--|--|--|--|--|--|--|--|--|--|--|--|--|--|--|--|--|--|--|--|--|--|--|--|--|--|--|--|--|--|--|--|--|--|--|--|--|--|--|--|--|--|--|--|--|--|--|--|--|--|--|--|--|--|--|--|--|--|--|--|--|--|--|--|--|--|--|--|--|--|--|--|--|--|--|--|--|--|--|--|--|--|--|--|--|--|--|--|--|--|--|--|--|--|--|--|--|--|--|--|--|--|--|--|--|--|--|--|--|--|--|--|--|--|--|--|--|--|--|--|--|--|--|--|--|--|--|--|--|--|--|--|--|--|--|--|----|
|--|--|--|--|--|--|--|--|--|--|--|--|--|--|--|--|--|--|--|--|--|--|--|--|--|--|--|--|--|--|--|--|--|--|--|--|--|--|--|--|--|--|--|--|--|--|--|--|--|--|--|--|--|--|--|--|--|--|--|--|--|--|--|--|--|--|--|--|--|--|--|--|--|--|--|--|--|--|--|--|--|--|--|--|--|--|--|--|--|--|--|--|--|--|--|--|--|--|--|--|--|--|--|--|--|--|--|--|--|--|--|--|--|--|--|--|--|--|--|--|--|--|--|--|--|--|--|--|--|--|--|--|--|--|--|--|--|--|--|--|--|--|--|--|--|--|--|--|--|--|--|--|--|--|--|--|--|--|--|--|--|--|--|--|--|--|--|--|--|--|--|--|--|--|--|--|--|--|--|--|--|--|--|--|--|--|--|--|--|--|--|--|--|--|--|--|--|--|--|--|--|--|--|--|--|--|--|--|--|--|--|--|--|--|--|--|--|--|--|--|--|--|--|--|--|--|--|--|--|--|--|--|--|--|--|--|--|--|--|--|--|--|--|--|--|--|--|--|--|--|--|--|--|--|--|--|--|--|--|--|--|--|--|--|--|--|--|--|--|--|--|--|--|--|--|--|--|--|--|--|--|--|--|--|--|--|--|--|--|--|--|--|--|--|--|--|--|--|--|--|--|--|--|--|--|--|--|--|--|--|--|--|--|--|--|--|--|--|--|--|--|--|--|--|--|--|--|--|--|--|--|--|--|--|--|--|--|--|--|--|--|--|--|--|--|--|--|--|--|--|--|--|--|--|--|--|--|--|--|--|--|--|--|--|--|--|--|--|--|--|--|--|--|--|--|--|--|--|--|--|--|--|--|--|--|--|--|--|--|--|--|--|--|--|--|--|--|--|--|--|--|--|--|--|--|--|--|--|--|--|--|--|--|--|--|--|--|--|--|--|--|--|--|--|--|--|--|--|--|--|--|--|--|--|--|--|--|--|--|--|--|--|--|--|--|--|--|--|--|--|--|--|--|--|--|--|--|--|--|--|--|--|--|--|--|--|--|--|--|--|--|--|--|--|--|--|--|--|--|--|--|--|--|--|--|--|--|--|--|--|--|--|--|--|--|--|--|--|--|--|--|--|--|--|--|--|--|--|--|--|--|--|--|--|--|--|--|--|--|--|--|--|--|--|--|--|--|--|--|--|--|--|--|--|--|--|--|--|--|--|--|--|--|--|--|--|--|--|--|--|--|--|--|--|--|--|--|--|--|--|--|--|--|--|--|--|--|--|--|--|--|--|--|--|--|--|--|--|--|--|--|--|--|--|--|--|--|--|--|--|--|--|--|--|--|--|--|--|--|--|--|--|--|--|--|--|--|--|--|--|--|--|--|--|--|--|--|--|--|--|--|--|--|--|--|--|--|--|--|--|--|--|--|--|--|--|--|--|--|--|--|--|--|--|--|--|--|--|--|--|--|--|--|--|--|--|--|--|--|--|--|--|--|--|--|--|--|--|--|--|--|--|--|--|--|--|--|--|--|--|--|--|--|--|--|--|--|--|--|--|--|--|--|--|--|--|--|--|--|--|--|--|--|--|--|--|--|--|--|--|--|--|--|--|--|--|--|--|--|--|--|--|--|--|--|--|--|--|--|--|--|--|--|--|--|--|--|--|--|--|--|--|--|--|--|--|--|--|--|--|--|--|--|--|--|--|--|--|--|--|--|--|--|--|--|--|--|--|--|--|--|--|--|--|--|--|--|--|--|--|--|--|--|--|--|--|--|--|--|--|--|--|--|--|--|--|--|--|--|--|--|--|--|--|--|--|--|--|--|--|--|--|--|--|--|--|--|--|--|--|--|--|--|--|--|--|--|--|--|--|--|--|--|--|--|--|--|--|--|--|--|--|--|--|--|--|--|--|--|--|--|--|--|--|--|--|--|--|--|--|--|--|--|--|--|--|--|--|--|--|--|--|--|--|--|--|--|--|--|--|--|--|--|--|--|--|--|--|--|--|--|--|--|--|--|--|--|--|--|--|--|--|--|--|--|--|--|--|--|--|--|--|--|--|--|--|--|--|--|--|--|--|--|--|--|--|--|--|--|--|--|--|--|--|--|--|--|--|--|--|--|--|--|--|--|--|--|--|--|--|--|--|--|--|--|--|--|--|--|--|--|--|--|--|--|--|--|--|--|--|--|--|--|--|--|--|--|--|--|--|--|--|--|--|--|--|--|--|--|--|--|--|--|--|--|--|--|--|--|--|--|--|--|--|--|--|--|--|--|--|--|--|--|--|--|--|--|--|--|--|--|--|--|--|--|--|--|--|--|--|--|--|--|--|--|--|--|--|--|--|--|--|--|--|--|--|--|--|--|--|--|--|--|--|--|--|--|--|--|--|--|--|--|--|--|--|--|--|--|--|--|--|--|--|--|--|--|--|--|--|--|--|--|--|--|--|--|--|--|--|--|--|--|--|--|--|--|--|--|--|--|--|--|--|--|--|--|--|--|--|--|--|--|--|--|--|--|--|--|--|--|--|--|--|--|--|--|--|--|--|--|--|--|--|--|--|--|--|--|--|--|--|--|--|--|--|--|--|--|--|--|--|--|--|--|--|--|--|--|--|--|--|--|--|--|--|--|--|--|--|--|--|--|--|--|--|--|--|--|--|--|--|--|--|--|--|--|--|--|--|--|--|--|--|--|--|--|--|--|--|--|--|--|--|--|--|--|--|--|--|--|--|--|--|--|--|--|--|--|--|--|--|--|--|--|--|--|--|--|--|--|--|--|--|--|--|--|--|--|--|--|--|--|--|--|--|--|--|--|--|--|--|--|--|--|--|--|--|--|--|--|--|--|--|--|--|--|--|--|--|--|--|--|--|--|--|--|--|--|--|--|--|--|--|--|--|--|--|--|--|--|--|--|--|--|--|--|--|--|--|--|--|--|--|--|--|--|--|--|--|--|--|--|--|--|--|--|--|--|--|--|--|--|--|--|--|--|--|--|--|--|--|--|--|--|--|--|--|--|--|--|--|--|--|--|--|--|--|--|--|--|--|--|--|--|--|--|--|--|--|--|--|--|--|--|--|--|--|--|--|--|--|--|--|--|--|--|--|--|--|--|--|--|--|--|--|--|--|--|--|--|--|--|--|--|--|--|--|--|--|--|--|--|--|--|--|--|--|--|--|--|--|--|--|--|--|--|--|--|--|--|--|--|--|--|--|--|--|--|--|--|--|--|--|--|--|--|--|--|--|--|--|--|--|--|--|--|--|--|--|--|--|--|--|--|--|--|--|--|--|--|--|--|--|--|--|--|--|--|--|--|--|--|--|--|--|--|--|--|--|--|--|--|--|--|--|--|--|--|--|--|--|--|--|--|--|--|--|--|--|--|--|--|--|--|--|--|--|--|--|--|--|--|--|--|--|--|--|--|--|--|--|--|--|--|--|--|--|--|--|----|





| Source         | Sequence ID           | Sequence Name              | Gene Symbol  | Ref name and plate type | Cpgr1 | Ratio      | Ratio | Ratio      | Ratio      | Log Ratio  | Log Ratio | Log Ratio  | Log Ratio  | p-value    | p-value | p-value    | p-value    | AdEMrTotal | AgEMrTotal | AdWTmTotal | AgWTmTotal | AdEMrmp1 | AdEMrmp2 | AdEMrmp3 | AdEMrmp1 | AgEMrmp2   | AgEMrmp3   | AdWTmmp1   | AdWTmmp2   | AdWTmmp3   | AgWTmmp1   | AgWTmmp2   | AgWTmmp3   |
|----------------|-----------------------|----------------------------|--------------|-------------------------|-------|------------|-------|------------|------------|------------|-----------|------------|------------|------------|---------|------------|------------|------------|------------|------------|------------|----------|----------|----------|----------|------------|------------|------------|------------|------------|------------|------------|------------|
|                |                       |                            |              |                         |       | AdEMrAdEMr | Ratio | AgEMrAdEMr | AgWTmAdEMr | AdEMrAdEMr | Ratio     | AgEMrAdEMr | AgWTmAdEMr | AdEMrAdEMr | Ratio   | AgEMrAdEMr | AgWTmAdEMr | AdEMrAdEMr | Ratio      | AgEMrAdEMr | AgWTmAdEMr | Spectral | Spectral | Spectral | Spectral | Normalized |
| CD-TOX PROTEIN | Q1C914P1 (CUP1)_MOUSE | Cer1                       | cup1         | 1                       | 0.64  | 1.67       | 1.43  | 0.55       | -0.20      | 0.22       | 0.15      | -0.26      | 0.148      | 0.116      | 0.349   | 0.097      | 7          | 10         | 11         | 6          | 0.774      | 1        | 3        | 3        | 2        | 4          | 4          | 2          | 2          | 2          | 2          | 2          |            |
| CD-TOX PROTEIN | Q1C914P1 (CUP1)_MOUSE | Ataxin-3                   | ataxin3      | 1                       | 1.48  | 1.05       | 1.11  | 0.88       | 0.13       | 0.03       | 0.03      | 0.12       | 0.28       | 0.441      | 0.77    | 17         | 7          | 10         | 6          | 0.774      | 1          | 3        | 3        | 2        | 4        | 4          | 2          | 2          | 2          | 2          | 2          |            |            |
| CD-TOX PROTEIN | Q1C914P1 (CUP1)_MOUSE | Ferritin                   | ferritin     | 1                       | 0.65  | 1.15       | 1.77  | 1.00       | -0.19      | 0.06       | 0.25      | 0.00       | 0.284      | 0.251      | 0.056   | 1.000      | 13         | 23         | 20         | 20         | 2          | 6        | 5        | 8        | 7        | 8          | 4          | 9          | 7          | 8          | 6          |            |            |
| CD-TOX PROTEIN | Q1C914P1 (CUP1)_MOUSE | Ferritin light chain 1     | ferritin     | 1                       | 0.65  | 1.15       | 1.77  | 1.00       | -0.19      | 0.06       | 0.25      | 0.00       | 0.284      | 0.251      | 0.056   | 1.000      | 13         | 23         | 20         | 20         | 2          | 6        | 5        | 8        | 7        | 8          | 4          | 9          | 7          | 8          | 6          |            |            |
| CD-TOX PROTEIN | Q1C914P1 (CUP1)_MOUSE | Myo12b                     | myo12b       | 1                       | 1.11  | 1.00       | 2.00  | 1.00       | -0.10      | 0.00       | 0.00      | 0.00       | 0.101      | 0.100      | 0.001   | 0.000      | 10         | 10         | 10         | 10         | 0          | 10       | 10       | 10       | 10       | 10         | 10         | 10         | 10         | 10         | 10         |            |            |
| CD-TOX PROTEIN | Q1C914P1 (CUP1)_MOUSE | Transaldolase              | taldo1       | 1                       | 1.00  | 2.00       | 1.50  | 0.75       | 0.00       | 0.30       | 0.18      | -0.12      | 1.000      | 0.304      | 0.069   | 0.815      | 4          | 6          | 4          | 3          | 2          | 2        | 0        | 1        | 4        | 1          | 0          | 0          | 4          | 1          | 1          | 1          |            |
| CD-TOX PROTEIN | Q1C914P1 (CUP1)_MOUSE | Perlecan                   | perlecan     | 1                       | 2.07  | 1.08       | 0.87  | 1.67       | 0.12       | 0.03       | 0.03      | -0.06      | 0.134      | 0.081      | 0.618   | 0.37       | 31         | 27         | 15         | 25         | 9          | 15       | 7        | 8        | 10       | 9          | 2          | 6          | 7          | 5          | 7          | 5          |            |
| CD-TOX PROTEIN | Q1C914P1 (CUP1)_MOUSE | Structural maintenance     | smn1         | 1                       | 2.07  | 1.08       | 0.87  | 1.67       | 0.12       | 0.03       | 0.03      | -0.06      | 0.134      | 0.081      | 0.618   | 0.37       | 31         | 27         | 15         | 25         | 9          | 15       | 7        | 8        | 10       | 9          | 2          | 6          | 7          | 5          | 7          | 5          |            |
| CD-TOX PROTEIN | Q1C914P1 (CUP1)_MOUSE | Eukaryotic translation     | ef1a3        | 1                       | 0.67  | 1.38       | 1.10  | 0.53       | -0.18      | 0.14       | 0.04      | -0.27      | 0.315      | 0.101      | 0.820   | 0.025      | 10         | 11         | 15         | 8          | 2          | 2        | 6        | 4        | 3        | 4          | 6          | 5          | 4          | 2          | 3          | 3          |            |
| CD-TOX PROTEIN | Q1C914P1 (CUP1)_MOUSE | Insulin-like growth factor | igf1         | 1                       | 2.25  | 1.22       | 0.85  | 2.25       | 0.51       | 0.09       | 0.07      | -0.05      | 0.074      | 0.492      | 0.579   | 0.189      | 13         | 11         | 4          | 9          | 4          | 3        | 6        | 5        | 3        | 3          | 0          | 3          | 1          | 2          | 3          | 3          |            |
| CD-TOX PROTEIN | Q1C914P1 (CUP1)_MOUSE | Cytochrome c               | cytochrome c | 1                       | 2.25  | 1.22       | 0.85  | 2.25       | 0.51       | 0.09       | 0.07      | -0.05      | 0.074      | 0.492      | 0.579   | 0.189      | 13         | 11         | 4          | 9          | 4          | 3        | 6        | 5        | 3        | 3          | 0          | 3          | 1          | 2          | 3          | 3          |            |
| CD-TOX PROTEIN | Q1C914P1 (CUP1)_MOUSE | Eukaryotic translation     | ef1a3        | 1                       | 0.67  | 1.38       | 1.10  | 0.53       | -0.18      | 0.14       | 0.04      | -0.27      | 0.315      | 0.101      | 0.820   | 0.025      | 10         | 11         | 15         | 8          | 2          | 2        | 6        | 4        | 3        | 4          | 6          | 5          | 4          | 2          | 3          | 3          |            |
| CD-TOX PROTEIN | Q1C914P1 (CUP1)_MOUSE | Insulin-like growth factor | igf1         | 1                       | 2.25  | 1.22       | 0.85  | 2.25       | 0.51       | 0.09       | 0.07      | -0.05      | 0.074      | 0.492      | 0.579   | 0.189      | 13         | 11         | 4          | 9          | 4          | 3        | 6        | 5        | 3        | 3          | 0          | 3          | 1          | 2          | 3          | 3          |            |
| CD-TOX PROTEIN | Q1C914P1 (CUP1)_MOUSE | Cytochrome c               | cytochrome c | 1                       | 2.25  | 1.22       | 0.85  | 2.25       | 0.51       | 0.09       | 0.07      | -0.05      | 0.074      | 0.492      | 0.579   | 0.189      | 13         | 11         | 4          | 9          | 4          | 3        | 6        | 5        | 3        | 3          | 0          | 3          | 1          | 2          | 3          | 3          |            |
| CD-TOX PROTEIN | Q1C914P1 (CUP1)_MOUSE | Eukaryotic translation     | ef1a3        | 1                       | 0.67  | 1.38       | 1.10  | 0.53       | -0.18      | 0.14       | 0.04      | -0.27      | 0.315      | 0.101      | 0.820   | 0.025      | 10         | 11         | 15         | 8          | 2          | 2        | 6        | 4        | 3        | 4          | 6          | 5          | 4          | 2          | 3          | 3          |            |
| CD-TOX PROTEIN | Q1C914P1 (CUP1)_MOUSE | Insulin-like growth factor | igf1         | 1                       | 2.25  | 1.22       | 0.85  | 2.25       | 0.51       | 0.09       | 0.07      | -0.05      | 0.074      | 0.492      | 0.579   | 0.189      | 13         | 11         | 4          | 9          | 4          | 3        | 6        | 5        | 3        | 3          | 0          | 3          | 1          | 2          | 3          | 3          |            |
| CD-TOX PROTEIN | Q1C914P1 (CUP1)_MOUSE | Cytochrome c               | cytochrome c | 1                       | 2.25  | 1.22       | 0.85  | 2.25       | 0.51       | 0.09       | 0.07      | -0.05      | 0.074      | 0.492      | 0.579   | 0.189      | 13         | 11         | 4          | 9          | 4          | 3        | 6        | 5        | 3        | 3          | 0          | 3          | 1          | 2          | 3          | 3          |            |
| CD-TOX PROTEIN | Q1C914P1 (CUP1)_MOUSE | Eukaryotic translation     | ef1a3        | 1                       | 0.67  | 1.38       | 1.10  | 0.53       | -0.18      | 0.14       | 0.04      | -0.27      | 0.315      | 0.101      | 0.820   | 0.025      | 10         | 11         | 15         | 8          | 2          | 2        | 6        | 4        | 3        | 4          | 6          | 5          | 4          | 2          | 3          | 3          |            |
| CD-TOX PROTEIN | Q1C914P1 (CUP1)_MOUSE | Insulin-like growth factor | igf1         | 1                       | 2.25  | 1.22       | 0.85  | 2.25       | 0.51       | 0.09       | 0.07      | -0.05      | 0.074      | 0.492      | 0.579   | 0.189      | 13         | 11         | 4          | 9          | 4          | 3        | 6        | 5        | 3        | 3          | 0          | 3          | 1          | 2          | 3          | 3          |            |
| CD-TOX PROTEIN | Q1C914P1 (CUP1)_MOUSE | Cytochrome c               | cytochrome c | 1                       | 2.25  | 1.22       | 0.85  | 2.25       | 0.51       | 0.09       | 0.07      | -0.05      | 0.074      | 0.492      | 0.579   | 0.189      | 13         | 11         | 4          | 9          | 4          | 3        | 6        | 5        | 3        | 3          | 0          | 3          | 1          | 2          | 3          | 3          |            |
| CD-TOX PROTEIN | Q1C914P1 (CUP1)_MOUSE | Eukaryotic translation     | ef1a3        | 1                       | 0.67  | 1.38       | 1.10  | 0.53       | -0.18      | 0.14       | 0.04      | -0.27      | 0.315      | 0.101      | 0.820   | 0.025      | 10         | 11         | 15         | 8          | 2          | 2        | 6        | 4        | 3        | 4          | 6          | 5          | 4          | 2          | 3          | 3          |            |
| CD-TOX PROTEIN | Q1C914P1 (CUP1)_MOUSE | Insulin-like growth factor | igf1         | 1                       | 2.25  | 1.22       | 0.85  | 2.25       | 0.51       | 0.09       | 0.07      | -0.05      | 0.074      | 0.492      | 0.579   | 0.189      | 13         | 11         | 4          | 9          | 4          | 3        | 6        | 5        | 3        | 3          | 0          | 3          | 1          | 2          | 3          | 3          |            |
| CD-TOX PROTEIN | Q1C914P1 (CUP1)_MOUSE | Cytochrome c               | cytochrome c | 1                       | 2.25  | 1.22       | 0.85  | 2.25       | 0.51       | 0.09       | 0.07      | -0.05      | 0.074      | 0.492      | 0.579   | 0.189      | 13         | 11         | 4          | 9          | 4          | 3        | 6        | 5        | 3        | 3          | 0          | 3          | 1          | 2          | 3          | 3          |            |
| CD-TOX PROTEIN | Q1C914P1 (CUP1)_MOUSE | Eukaryotic translation     | ef1a3        | 1                       | 0.67  | 1.38       | 1.10  | 0.53       | -0.18      | 0.14       | 0.04      | -0.27      | 0.315      | 0.101      | 0.820   | 0.025      | 10         | 11         | 15         | 8          | 2          | 2        | 6        | 4        | 3        | 4          | 6          | 5          | 4          | 2          | 3          | 3          |            |
| CD-TOX PROTEIN | Q1C914P1 (CUP1)_MOUSE | Insulin-like growth factor | igf1         | 1                       | 2.25  | 1.22       | 0.85  | 2.25       | 0.51       | 0.09       | 0.07      | -0.05      | 0.074      | 0.492      | 0.579   | 0.189      | 13         | 11         | 4          | 9          | 4          | 3        | 6        | 5        | 3        | 3          | 0          | 3          | 1          | 2          | 3          | 3          |            |
| CD-TOX PROTEIN | Q1C914P1 (CUP1)_MOUSE | Cytochrome c               | cytochrome c | 1                       | 2.25  | 1.22       | 0.85  | 2.25       | 0.51       | 0.09       | 0.07      | -0.05      | 0.074      | 0.492      | 0.579   | 0.189      | 13         | 11         | 4          | 9          | 4          | 3        | 6        | 5        | 3        | 3          | 0          | 3          | 1          | 2          | 3          | 3          |            |
| CD-TOX PROTEIN | Q1C914P1 (CUP1)_MOUSE | Eukaryotic translation     | ef1a3        | 1                       | 0.67  | 1.38       | 1.10  | 0.53       | -0.18      | 0.14       | 0.04      | -0.27      | 0.315      | 0.101      | 0.820   | 0.025      | 10         | 11         | 15         | 8          | 2          | 2        | 6        | 4        | 3        | 4          | 6          | 5          | 4          | 2          | 3          | 3          |            |
| CD-TOX PROTEIN | Q1C914P1 (CUP1)_MOUSE | Insulin-like growth factor | igf1         | 1                       | 2.25  | 1.22       | 0.85  | 2.25       | 0.51       | 0.09       | 0.07      | -0.05      | 0.074      | 0.492      | 0.579   | 0.189      | 13         | 11         | 4          | 9          | 4          | 3        | 6        | 5        | 3        | 3          | 0          | 3          | 1          | 2          | 3          | 3          |            |
| CD-TOX PROTEIN | Q1C914P1 (CUP1)_MOUSE | Cytochrome c               | cytochrome c | 1                       | 2.25  | 1.22       | 0.85  | 2.25       | 0.51       | 0.09       | 0.07      | -0.05      | 0.074      | 0.492      | 0.579   | 0.189      | 13         | 11         | 4          | 9          | 4          | 3        | 6        | 5        | 3        | 3          | 0          | 3          | 1          | 2          | 3          | 3          |            |
| CD-TOX PROTEIN | Q1C914P1 (CUP1)_MOUSE | Eukaryotic translation     | ef1a3        | 1                       | 0.67  | 1.38       | 1.10  | 0.53       | -0.18      | 0.14       | 0.04      | -0.27      | 0.315      | 0.101      | 0.820   | 0.025      | 10         | 11         | 15         | 8          | 2          | 2        | 6        | 4        | 3        | 4          | 6          | 5          | 4          | 2          | 3          | 3          |            |
| CD-TOX PROTEIN | Q1C914P1 (CUP1)_MOUSE | Insulin-like growth factor | igf1         | 1                       | 2.25  | 1.22       | 0.85  | 2.25       | 0.51       | 0.09       | 0.07      | -0.05      | 0.074      | 0.492      | 0.579   | 0.189      | 13         | 11         | 4          | 9          | 4          | 3        | 6        | 5        | 3        | 3          | 0          | 3          | 1          | 2          | 3          | 3          |            |
| CD-TOX PROTEIN | Q1C914P1 (CUP1)_MOUSE | Cytochrome c               | cytochrome c | 1                       | 2.25  | 1.22       | 0.85  | 2.25       | 0.51       | 0.09       | 0.07      | -0.05      | 0.074      | 0.492      | 0.579   | 0.189      | 13         | 11         | 4          | 9          | 4          | 3        | 6        | 5        | 3        | 3          | 0          | 3          | 1          | 2          | 3          | 3          |            |
| CD-TOX PROTEIN | Q1C914P1 (CUP1)_MOUSE | Eukaryotic translation     | ef1a3        | 1                       | 0.67  | 1.38       | 1.10  | 0.53       | -0.18      | 0.14       | 0.04      | -0.27      | 0.315      | 0.101      | 0.820   | 0.025      | 10         | 11         | 15         | 8          | 2          | 2        | 6        | 4        | 3        | 4          | 6          | 5          | 4          | 2          | 3          | 3          |            |
| CD-TOX PROTEIN | Q1C914P1 (CUP1)_MOUSE | Insulin-like growth factor | igf1         | 1                       | 2.25  | 1.22       | 0.85  | 2.25       | 0.51       | 0.09       | 0.07      | -0.05      | 0.074      | 0.492      | 0.579   | 0.189      | 13         | 11         | 4          | 9          | 4          | 3        | 6        | 5        | 3        | 3          | 0          | 3          | 1          | 2          | 3          | 3          |            |
| CD-TOX PROTEIN | Q1C914P1 (CUP1)_MOUSE | Cytochrome c               | cytochrome c | 1                       | 2.25  | 1.22       | 0.85  | 2.25       | 0.51       | 0.09       | 0.07      | -0.05      | 0.074      | 0.492      | 0.579   | 0.189      | 13         | 11         | 4          | 9          | 4          | 3        | 6        | 5        | 3        | 3          | 0          | 3          | 1          | 2          | 3          | 3          |            |
| CD-TOX PROTEIN | Q1C914P1 (CUP1)_MOUSE | Eukaryotic translation     | ef1a3        | 1                       | 0.67  | 1.38       | 1.10  | 0.53       | -0.18      | 0.14       | 0.04      | -0.27      | 0.315      | 0.101      | 0.820   | 0.025      | 10         | 11         | 15         | 8          | 2          | 2        | 6        | 4        | 3        | 4          | 6          | 5          | 4          | 2          | 3          | 3          |            |
| CD-TOX PROTEIN | Q1C914P1 (CUP1)_MOUSE | Insulin-like growth factor | igf1         | 1                       | 2.25  | 1.22       | 0.85  | 2.25       | 0.51       | 0.09       | 0.07      | -0.05      | 0.074      | 0.492      | 0.579   | 0.189      | 13         | 11         | 4          | 9          | 4          | 3        | 6        | 5        | 3        | 3          | 0          | 3          | 1          | 2          | 3          | 3          |            |
| CD-TOX PROTEIN | Q1C914P1 (CUP1)_MOUSE | Cytochrome c               | cytochrome c | 1                       | 2.25  | 1.22       | 0.85  | 2.25       | 0.51       | 0.09       | 0.07      | -0.05      | 0.074      | 0.492      | 0.579   | 0.189      | 13         | 11         | 4          | 9          | 4          | 3        | 6        | 5        | 3        | 3          | 0          | 3          | 1          | 2          | 3          | 3          |            |
| CD-TOX PROTEIN | Q1C914P1 (CUP1)_MOUSE | Eukaryotic translation     | ef1a3        | 1                       | 0.67  | 1.38       | 1.10  | 0.53       | -0.18      | 0.14       | 0.04      | -0.27      | 0.315      | 0.101      | 0.820   | 0.025      | 10         | 11         | 15         | 8          | 2          | 2        | 6        | 4        | 3        | 4          | 6          | 5          | 4          | 2          | 3          | 3          |            |
| CD-TOX PROTEIN | Q1C914P1 (CUP1)_MOUSE | Insulin-like growth factor | igf1         | 1                       | 2.25  | 1.22       | 0.85  | 2.25       | 0.51       | 0.09       | 0.07      | -0.05      | 0.074      | 0.492      | 0.579   | 0.189      | 13         | 11         | 4          | 9          | 4          | 3        | 6        | 5        | 3        | 3          | 0          | 3          | 1          | 2          | 3          | 3          |            |
| CD-TOX PROTEIN | Q1C914P1 (CUP1)_MOUSE | Cytochrome c               | cytochrome c | 1                       | 2.25  | 1.22       | 0.85  | 2.25       | 0.51       | 0.09       | 0.07      | -0.05      | 0.074      | 0.492      | 0.579   | 0.189      | 13         | 11         | 4          | 9          | 4          | 3        | 6        | 5        | 3        | 3          | 0          | 3          | 1          | 2          | 3          | 3          |            |
| CD-TOX PROTEIN | Q1C914P1 (CUP1)_MOUSE | Eukaryotic translation     | ef1a3        | 1                       | 0.67  | 1.38       | 1.10  | 0.53       | -0.18      | 0.14       | 0.04      | -0.27      | 0.315      | 0.101      | 0.820   | 0.025      | 10         | 11         | 15         | 8          | 2          | 2        | 6        | 4        | 3        | 4          | 6          | 5          | 4          | 2          | 3          | 3          |            |
| CD-TOX PROTEIN | Q1C914P1 (CUP1)_MOUSE | Insulin-like growth factor | igf1         | 1                       | 2.25  | 1.22       | 0.85  | 2.25       | 0.51       | 0.09       | 0.07      | -0.05      | 0.074      | 0.492      | 0.579   | 0.189      | 13         | 11         | 4          | 9          | 4          | 3        | 6        | 5        | 3        | 3          | 0          | 3          | 1          | 2          | 3          | 3          |            |
| CD-TOX PROTEIN | Q1C914P1 (CUP1)_MOUSE | Cytochrome c               | cytochrome c | 1                       | 2.25  | 1.22       | 0.85  | 2.25       | 0.51       | 0.09       | 0.07      | -0.05      | 0.074      | 0.492      | 0.579   | 0.189      | 13         | 11         | 4          | 9          | 4          | 3        | 6        | 5        | 3        | 3</        |            |            |            |            |            |            |            |

|                |                  | Sequence ID | Sequence Name              | Gene Symbol | Ratio<br>AggM1/AggT | Ratio<br>AggM2/AggT | Ratio<br>AggM3/AggT | Ratio<br>AggM4/AggT | Log Ratio<br>AggM1/AggT | Log Ratio<br>AggM2/AggT | Log Ratio<br>AggM3/AggT | Log Ratio<br>AggM4/AggT | p-value<br>AggM1/AggT | p-value<br>AggM2/AggT | p-value<br>AggM3/AggT | p-value<br>AggM4/AggT | AggM1 Total<br>Spectral Count | AggM2 Total<br>Spectral Count | AggM3 Total<br>Spectral Count | AggM4 Total<br>Spectral Count | AggM1rep1<br>Normalized SC | AggM2rep1<br>Normalized SC | AggM3rep1<br>Normalized SC | AggM4rep1<br>Normalized SC | AggM1rep2<br>Normalized SC | AggM2rep2<br>Normalized SC | AggM3rep2<br>Normalized SC | AggM4rep2<br>Normalized SC | AggM1rep3<br>Normalized SC | AggM2rep3<br>Normalized SC | AggM3rep3<br>Normalized SC | AggM4rep3<br>Normalized SC |   |
|----------------|------------------|-------------|----------------------------|-------------|---------------------|---------------------|---------------------|---------------------|-------------------------|-------------------------|-------------------------|-------------------------|-----------------------|-----------------------|-----------------------|-----------------------|-------------------------------|-------------------------------|-------------------------------|-------------------------------|----------------------------|----------------------------|----------------------------|----------------------------|----------------------------|----------------------------|----------------------------|----------------------------|----------------------------|----------------------------|----------------------------|----------------------------|---|
| CO-TOX PROTEIN | qjP2441(DH32)    | Mouse       | Glutamate dehydrogenase    | Gdh1d       | 1.24                | 1.01                | 0.75                | 0.92                | 0.09                    | 0.01                    | -0.12                   | 0.04                    | 0.270                 | 0.938                 | 0.165                 | 0.609                 | 109                           | 82                            | 88                            | 81                            | 4                          | 37                         | 28                         | 32                         | 27                         | 23                         | 24                         | 34                         | 30                         | 25                         | 33                         |                            |   |
| CO-TOX PROTEIN | qjP2427(DH32)    | Mouse       | G60 ribosomal protein      | Rpl17       | 1.50                | 1.20                | 0.92                | 0.63                | 0.18                    | 0.34                    | -0.04                   | -0.20                   | 0.492                 | 0.955                 | 0.851                 | 0.639                 | 12                            | 11                            | 8                             | 5                             | 2                          | 7                          | 3                          | 3                          | 5                          | 1                          | 3                          | 4                          | 2                          | 1                          | 3                          | 3                          |   |
| CO-TOX PROTEIN | qjP0076(R17)     | Mouse       | G60 ribosomal protein      | Rpl17       | 1.50                | 1.20                | 0.92                | 0.63                | 0.18                    | 0.34                    | -0.04                   | -0.20                   | 0.492                 | 0.955                 | 0.851                 | 0.639                 | 12                            | 11                            | 8                             | 5                             | 2                          | 7                          | 3                          | 3                          | 5                          | 1                          | 3                          | 4                          | 2                          | 1                          | 3                          | 3                          |   |
| CO-TOX PROTEIN | qjP0077(S178)    | Mouse       | Synthetase-binding protein | Ssbp1       | 1.09                | 2.00                | 1.17                | 0.64                | 0.04                    | 0.30                    | 0.07                    | -0.20                   | 0.815                 | 0.102                 | 0.561                 | 0.887                 | 12                            | 14                            | 11                            | 7                             | 4                          | 4                          | 5                          | 5                          | 6                          | 3                          | 3                          | 6                          | 2                          | 1                          | 3                          | 3                          |   |
| CO-TOX PROTEIN | qjP019VVR(V183)  | Mouse       | Epidermal growth factor    | Egfr        | 0.80                | 1.00                | 0.75                | 0.60                | -0.10                   | -0.12                   | -0.22                   | -0.20                   | 0.185                 | 0.134                 | 0.174                 | 0.216                 | 8                             | 6                             | 10                            | 6                             | 3                          | 2                          | 3                          | 2                          | 3                          | 1                          | 4                          | 3                          | 3                          | 2                          | 1                          | 2                          | 0 |
| CO-TOX PROTEIN | qjP0217P(EGFR)   | Mouse       | Epidermal growth factor    | Egfr        | 0.80                | 1.00                | 0.75                | 0.60                | -0.10                   | -0.12                   | -0.22                   | -0.20                   | 0.185                 | 0.134                 | 0.174                 | 0.216                 | 8                             | 6                             | 10                            | 6                             | 3                          | 2                          | 3                          | 2                          | 3                          | 1                          | 4                          | 3                          | 3                          | 2                          | 1                          | 2                          | 0 |
| CO-TOX PROTEIN | qjP20W7(LVHC)    | Mouse       | Protein LYHC               | Lvhc        | 1.00                | 2.00                | 3.33                | 0.83                | 0.50                    | 0.30                    | 0.52                    | -0.08                   | 0.330                 | 0.158                 | 0.134                 | 0.174                 | 0.216                         | 12                            | 10                            | 6                             | 3                          | 2                          | 5                          | 5                          | 6                          | 2                          | 2                          | 1                          | 2                          | 3                          | 1                          | 2                          | 0 |
| CO-TOX PROTEIN | qjP2144P(SACR)   | Mouse       | Beta-actin-sarcoglycan     | Sgca        | 0.93                | 1.11                | 0.90                | 0.83                | 0.05                    | 0.15                    | -0.05                   | -0.12                   | 0.042                 | 0.153                 | 0.184                 | 0.184                 | 0.216                         | 10                            | 14                            | 9                             | 8                          | 4                          | 4                          | 4                          | 4                          | 0                          | 1                          | 3                          | 3                          | 1                          | 3                          | 2                          | 1 |
| CO-TOX PROTEIN | qjP02952(PMAL)   | Mouse       | Protein PMAL               | Pmal        | 1.33                | 1.40                | 0.88                | 0.83                | 0.12                    | 0.15                    | -0.06                   | -0.08                   | 0.670                 | 0.422                 | 0.834                 | 0.643                 | 8                             | 7                             | 6                             | 5                             | 4                          | 4                          | 0                          | 1                          | 3                          | 3                          | 1                          | 3                          | 2                          | 2                          | 1                          | 2                          | 1 |
| CO-TOX PROTEIN | qjP07153(CBPF)   | Mouse       | Cystine and glycine-1      | Cys1        | 1.33                | 1.40                | 0.88                | 0.83                | 0.12                    | 0.15                    | -0.06                   | -0.08                   | 0.670                 | 0.422                 | 0.834                 | 0.643                 | 8                             | 7                             | 6                             | 5                             | 4                          | 4                          | 0                          | 1                          | 3                          | 3                          | 1                          | 3                          | 2                          | 2                          | 1                          | 2                          | 1 |
| CO-TOX PROTEIN | qjP01932(GAIT)   | Mouse       | 4-aminobutyrate aminase    | Abat        | 0.88                | 1.27                | 1.67                | 0.61                | 0.08                    | 0.36                    | -0.11                   | -0.22                   | 0.629                 | 0.135                 | 0.298                 | 0.116                 | 15                            | 25                            | 18                            | 11                            | 3                          | 4                          | 8                          | 12                         | 9                          | 4                          | 6                          | 8                          | 4                          | 2                          | 5                          | 4                          |   |
| CO-TOX PROTEIN | qjP1E031E2(SALP) | Mouse       | Paralamin-5                | Pal5        | 0.88                | 1.27                | 1.67                | 0.61                | 0.08                    | 0.36                    | -0.11                   | -0.22                   | 0.629                 | 0.135                 | 0.298                 | 0.116                 | 15                            | 25                            | 18                            | 11                            | 3                          | 4                          | 8                          | 12                         | 9                          | 4                          | 6                          | 8                          | 4                          | 2                          | 5                          | 4                          |   |
| CO-TOX PROTEIN | qjP1E031E2(SALP) | Mouse       | Paralamin-5                | Pal5        | 0.88                | 1.27                | 1.67                | 0.61                | 0.08                    | 0.36                    | -0.11                   | -0.22                   | 0.629                 | 0.135                 | 0.298                 | 0.116                 | 15                            | 25                            | 18                            | 11                            | 3                          | 4                          | 8                          | 12                         | 9                          | 4                          | 6                          | 8                          | 4                          | 2                          | 5                          | 4                          |   |
| CO-TOX PROTEIN | qjP0298P(NL55)   | Mouse       | Nuclear pore complex       | Nup155      | 1.29                | 1.00                | 0.50                | 0.71                | 0.11                    | 0.05                    | -0.30                   | -0.15                   | 0.492                 | 0.795                 | 0.176                 | 0.294                 | 18                            | 9                             | 14                            | 10                            | 3                          | 7                          | 8                          | 2                          | 5                          | 2                          | 3                          | 6                          | 5                          | 4                          | 4                          | 2                          |   |
| CO-TOX PROTEIN | qjP17426-2(PA2)  | Mouse       | Isom of A-2 of c-2         | Ap2a1       | 1.27                | 1.01                | 0.70                | 0.88                | 0.10                    | 0.01                    | -0.15                   | -0.06                   | 0.361                 | 0.944                 | 0.224                 | 0.441                 | 114                           | 80                            | 90                            | 79                            | 52                         | 34                         | 28                         | 23                         | 33                         | 24                         | 25                         | 35                         | 30                         | 32                         | 21                         | 26                         |   |
| CO-TOX PROTEIN | qjP00606(PALM)   | Mouse       | Protein PALM               | Pal5        | 1.33                | 1.40                | 0.88                | 0.83                | 0.12                    | 0.15                    | -0.06                   | -0.08                   | 0.670                 | 0.422                 | 0.834                 | 0.643                 | 8                             | 7                             | 6                             | 5                             | 4                          | 4                          | 0                          | 1                          | 3                          | 3                          | 1                          | 3                          | 2                          | 2                          | 1                          | 2                          | 1 |
| CO-TOX PROTEIN | qjP00606(PALM)   | Mouse       | Protein PALM               | Pal5        | 1.33                | 1.40                | 0.88                | 0.83                | 0.12                    | 0.15                    | -0.06                   | -0.08                   | 0.670                 | 0.422                 | 0.834                 | 0.643                 | 8                             | 7                             | 6                             | 5                             | 4                          | 4                          | 0                          | 1                          | 3                          | 3                          | 1                          | 3                          | 2                          | 2                          | 1                          | 2                          | 1 |
| CO-TOX PROTEIN | qjP00606(PALM)   | Mouse       | Protein PALM               | Pal5        | 1.33                | 1.40                | 0.88                | 0.83                | 0.12                    | 0.15                    | -0.06                   | -0.08                   | 0.670                 | 0.422                 | 0.834                 | 0.643                 | 8                             | 7                             | 6                             | 5                             | 4                          | 4                          | 0                          | 1                          | 3                          | 3                          | 1                          | 3                          | 2                          | 2                          | 1                          | 2                          | 1 |
| CO-TOX PROTEIN | qjP00606(PALM)   | Mouse       | Protein PALM               | Pal5        | 1.33                | 1.40                | 0.88                | 0.83                | 0.12                    | 0.15                    | -0.06                   | -0.08                   | 0.670                 | 0.422                 | 0.834                 | 0.643                 | 8                             | 7                             | 6                             | 5                             | 4                          | 4                          | 0                          | 1                          | 3                          | 3                          | 1                          | 3                          | 2                          | 2                          | 1                          | 2                          | 1 |
| CO-TOX PROTEIN | qjP00606(PALM)   | Mouse       | Protein PALM               | Pal5        | 1.33                | 1.40                | 0.88                | 0.83                | 0.12                    | 0.15                    | -0.06                   | -0.08                   | 0.670                 | 0.422                 | 0.834                 | 0.643                 | 8                             | 7                             | 6                             | 5                             | 4                          | 4                          | 0                          | 1                          | 3                          | 3                          | 1                          | 3                          | 2                          | 2                          | 1                          | 2                          | 1 |
| CO-TOX PROTEIN | qjP00606(PALM)   | Mouse       | Protein PALM               | Pal5        | 1.33                | 1.40                | 0.88                | 0.83                | 0.12                    | 0.15                    | -0.06                   | -0.08                   | 0.670                 | 0.422                 | 0.834                 | 0.643                 | 8                             | 7                             | 6                             | 5                             | 4                          | 4                          | 0                          | 1                          | 3                          | 3                          | 1                          | 3                          | 2                          | 2                          | 1                          | 2                          | 1 |
| CO-TOX PROTEIN | qjP00606(PALM)   | Mouse       | Protein PALM               | Pal5        | 1.33                | 1.40                | 0.88                | 0.83                | 0.12                    | 0.15                    | -0.06                   | -0.08                   | 0.670                 | 0.422                 | 0.834                 | 0.643                 | 8                             | 7                             | 6                             | 5                             | 4                          | 4                          | 0                          | 1                          | 3                          | 3                          | 1                          | 3                          | 2                          | 2                          | 1                          | 2                          | 1 |
| CO-TOX PROTEIN | qjP00606(PALM)   | Mouse       | Protein PALM               | Pal5        | 1.33                | 1.40                | 0.88                | 0.83                | 0.12                    | 0.15                    | -0.06                   | -0.08                   | 0.670                 | 0.422                 | 0.834                 | 0.643                 | 8                             | 7                             | 6                             | 5                             | 4                          | 4                          | 0                          | 1                          | 3                          | 3                          | 1                          | 3                          | 2                          | 2                          | 1                          | 2                          | 1 |
| CO-TOX PROTEIN | qjP00606(PALM)   | Mouse       | Protein PALM               | Pal5        | 1.33                | 1.40                | 0.88                | 0.83                | 0.12                    | 0.15                    | -0.06                   | -0.08                   | 0.670                 | 0.422                 | 0.834                 | 0.643                 | 8                             | 7                             | 6                             | 5                             | 4                          | 4                          | 0                          | 1                          | 3                          | 3                          | 1                          | 3                          | 2                          | 2                          | 1                          | 2                          | 1 |
| CO-TOX PROTEIN | qjP00606(PALM)   | Mouse       | Protein PALM               | Pal5        | 1.33                | 1.40                | 0.88                | 0.83                | 0.12                    | 0.15                    | -0.06                   | -0.08                   | 0.670                 | 0.422                 | 0.834                 | 0.643                 | 8                             | 7                             | 6                             | 5                             | 4                          | 4                          | 0                          | 1                          | 3                          | 3                          | 1                          | 3                          | 2                          | 2                          | 1                          | 2                          | 1 |
| CO-TOX PROTEIN | qjP00606(PALM)   | Mouse       | Protein PALM               | Pal5        | 1.33                | 1.40                | 0.88                | 0.83                | 0.12                    | 0.15                    | -0.06                   | -0.08                   | 0.670                 | 0.422                 | 0.834                 | 0.643                 | 8                             | 7                             | 6                             | 5                             | 4                          | 4                          | 0                          | 1                          | 3                          | 3                          | 1                          | 3                          | 2                          | 2                          | 1                          | 2                          | 1 |
| CO-TOX PROTEIN | qjP00606(PALM)   | Mouse       | Protein PALM               | Pal5        | 1.33                | 1.40                | 0.88                | 0.83                | 0.12                    | 0.15                    | -0.06                   | -0.08                   | 0.670                 | 0.422                 | 0.834                 | 0.643                 | 8                             | 7                             | 6                             | 5                             | 4                          | 4                          | 0                          | 1                          | 3                          | 3                          | 1                          | 3                          | 2                          | 2                          | 1                          | 2                          | 1 |
| CO-TOX PROTEIN | qjP00606(PALM)   | Mouse       | Protein PALM               | Pal5        | 1.33                | 1.40                | 0.88                | 0.83                | 0.12                    | 0.15                    | -0.06                   | -0.08                   | 0.670                 | 0.422                 | 0.834                 | 0.643                 | 8                             | 7                             | 6                             | 5                             | 4                          | 4                          | 0                          | 1                          | 3                          | 3                          | 1                          | 3                          | 2                          | 2                          | 1                          | 2                          | 1 |
| CO-TOX PROTEIN | qjP00606(PALM)   | Mouse       | Protein PALM               | Pal5        | 1.33                | 1.40                | 0.88                | 0.83                | 0.12                    | 0.15                    | -0.06                   | -0.08                   | 0.670                 | 0.422                 | 0.834                 | 0.643                 | 8                             | 7                             | 6                             | 5                             | 4                          | 4                          | 0                          | 1                          | 3                          | 3                          | 1                          | 3                          | 2                          | 2                          | 1                          | 2                          | 1 |
| CO-TOX PROTEIN | qjP00606(PALM)   | Mouse       | Protein PALM               | Pal5        | 1.33                | 1.40                | 0.88                | 0.83                | 0.12                    | 0.15                    | -0.06                   | -0.08                   | 0.670                 | 0.422                 | 0.834                 | 0.643                 | 8                             | 7                             | 6                             | 5                             | 4                          | 4                          | 0                          | 1                          | 3                          | 3                          | 1                          | 3                          | 2                          | 2                          | 1                          | 2                          | 1 |
| CO-TOX PROTEIN | qjP00606(PALM)   | Mouse       | Protein PALM               | Pal5        | 1.33                | 1.40                | 0.88                | 0.83                | 0.12                    | 0.15                    | -0.06                   | -0.08                   | 0.670                 | 0.422                 | 0.834                 | 0.643                 | 8                             | 7                             | 6                             | 5                             | 4                          | 4                          | 0                          | 1                          | 3                          | 3                          | 1                          | 3                          | 2                          | 2                          | 1                          | 2                          | 1 |
| CO-TOX PROTEIN | qjP00606(PALM)   | Mouse       | Protein PALM               | Pal5        | 1.33                | 1.40                | 0.88                | 0.83                | 0.12                    | 0.15                    | -0.06                   | -0.08                   | 0.670                 | 0.422                 | 0.834                 | 0.643                 | 8                             | 7                             | 6                             | 5                             | 4                          | 4                          | 0                          | 1                          | 3                          | 3                          | 1                          | 3                          | 2                          | 2                          | 1                          | 2                          | 1 |
| CO-TOX PROTEIN | qjP00606(PALM)   | Mouse       | Protein PALM               | Pal5        | 1.33                | 1.40                | 0.88                | 0.83                | 0.12                    | 0.15                    | -0.06                   | -0.08                   | 0.670                 | 0.422                 | 0.834                 | 0.643                 | 8                             | 7                             | 6                             | 5                             | 4                          | 4                          | 0                          | 1                          | 3                          | 3                          | 1                          | 3                          | 2                          | 2                          | 1                          | 2                          | 1 |
| CO-TOX PROTEIN | qjP00606(PALM)   | Mouse       | Protein PALM               | Pal5        | 1.33                | 1.40                | 0.88                | 0.83                | 0.12                    | 0.15                    | -0.06                   | -0.08                   | 0.670                 | 0.422                 | 0.834                 | 0.643                 | 8                             | 7                             | 6                             | 5                             | 4                          | 4                          | 0                          | 1                          | 3                          | 3                          | 1                          | 3                          | 2                          | 2                          | 1                          | 2                          | 1 |
| CO-TOX PROTEIN | qjP00606(PALM)   | Mouse       | Protein PALM               | Pal5        | 1.33                | 1.40                | 0.88                | 0.83                | 0.12                    | 0.15                    | -0.06                   | -0.08                   | 0.670                 | 0.422                 | 0.834                 | 0.643                 | 8                             | 7                             | 6                             | 5                             | 4                          | 4                          | 0                          | 1                          | 3                          | 3                          | 1                          | 3                          | 2                          | 2                          | 1                          | 2                          | 1 |
| CO-TOX PROTEIN | qjP00606(PALM)   | Mouse       | Protein PALM               | Pal5        | 1.33                | 1.40                | 0.88                | 0.83                | 0.12                    | 0.15                    | -0.06                   | -0.08                   | 0.670                 | 0.422                 | 0.834                 | 0.643                 | 8                             | 7                             | 6                             | 5                             | 4                          | 4                          | 0                          | 1                          | 3                          | 3                          | 1                          | 3                          | 2                          | 2                          | 1                          | 2                          | 1 |
| CO-TOX PROTEIN | qjP00606(PALM)   | Mouse       | Protein PALM               | Pal5        | 1.33                | 1.40                | 0.88                | 0.83                | 0.12                    | 0.15                    | -0.06                   | -0.08                   | 0.670                 | 0.422                 | 0.834                 | 0.643                 | 8                             | 7                             | 6                             | 5                             | 4                          | 4                          | 0                          | 1                          | 3                          | 3                          | 1                          | 3                          | 2                          | 2                          | 1                          | 2                          | 1 |
| CO-TOX PROTEIN | qjP00606(PALM)   | Mouse       | Protein PALM               | Pal5        | 1.33                | 1.40                | 0.88                | 0.83                | 0.12                    | 0.15                    | -0.06                   | -0.08                   | 0.670                 | 0.422                 | 0.834                 | 0.643                 | 8                             | 7                             | 6                             | 5                             | 4                          | 4                          | 0                          | 1                          | 3                          | 3                          | 1                          | 3                          | 2                          | 2                          | 1                          | 2                          | 1 |
| CO-TOX PROTEIN | qjP00606(PALM)   | Mouse       | Protein PALM               | Pal5        | 1.33                | 1.40                | 0.88                | 0.83                | 0.12                    | 0.15                    | -0.06                   | -0.08                   | 0.670                 | 0.422                 | 0.834                 | 0.643                 | 8                             | 7                             | 6                             | 5                             | 4                          | 4                          | 0                          | 1                          | 3                          | 3                          | 1                          | 3                          | 2                          | 2                          | 1                          | 2                          | 1 |
| CO-TOX PROTEIN | qjP00606(PALM)   | Mouse       | Protein PALM               | Pal5        | 1.33                | 1.40                | 0.88                | 0.83                | 0.12                    | 0.15                    | -0.06                   | -0.08                   | 0.670                 | 0.422                 | 0.834                 | 0.643                 | 8                             | 7                             | 6                             | 5                             | 4                          | 4                          | 0                          | 1                          | 3                          | 3                          | 1                          | 3                          | 2                          | 2                          | 1                          | 2                          | 1 |
| CO-TOX PROTEIN | qjP00606(PALM)   | Mouse       | Protein PALM               | Pal5        | 1.33                | 1.40                | 0.88                | 0.83                | 0.12                    | 0.15                    | -0.06                   | -0.08                   | 0.670                 | 0.422                 | 0.834                 | 0.643                 | 8                             | 7                             | 6                             | 5                             | 4                          | 4                          | 0                          | 1                          | 3                          | 3                          | 1                          | 3                          | 2                          | 2                          | 1                          | 2                          | 1 |
| CO-TOX PROTEIN | qjP00606(PALM)   | Mouse       | Protein PALM               | Pal5        | 1.33                | 1.40                | 0.88                | 0.83                | 0.12                    | 0.15                    | -0.06                   | -0.08                   | 0.670                 | 0.422                 | 0.834                 | 0.643                 | 8                             | 7                             | 6                             | 5                             | 4                          | 4                          | 0                          | 1                          | 3                          | 3                          | 1                          | 3                          | 2                          | 2                          | 1                          | 2                          | 1 |
| CO-TOX PROTEIN | qjP00606(PALM)   | Mouse       | Protein PALM               | Pal5        | 1.33                | 1.40                | 0.88                | 0.83                | 0.12                    | 0.15                    | -0.06                   | -0.08                   | 0.670                 | 0.422                 | 0.834                 | 0.643                 | 8                             | 7                             | 6                             | 5                             | 4                          | 4                          | 0                          | 1                          | 3                          | 3                          | 1                          | 3                          | 2                          | 2                          | 1                          | 2                          | 1 |
| CO-TOX PROTEIN | qjP00606(PALM)   | Mouse       | Protein PALM               | Pal5        | 1.33                | 1.40                | 0.88                | 0.83                | 0.12                    | 0.15                    | -0.06                   | -0.08                   | 0.670                 | 0.422                 | 0.834                 | 0.643                 | 8                             | 7                             | 6                             | 5                             | 4                          | 4                          | 0                          | 1                          | 3                          | 3                          | 1                          | 3                          | 2                          | 2                          | 1                          | 2                          | 1 |
| CO-TOX PROTEIN | qjP00606(PALM)   | Mouse       | Protein PALM               | Pal5        | 1.33                | 1.40                |                     |                     |                         |                         |                         |                         |                       |                       |                       |                       |                               |                               |                               |                               |                            |                            |                            |                            |                            |                            |                            |                            |                            |                            |                            |                            |   |

| Source      | Sequence ID            | Sequence Name                 | Gene Symbol | Ratio<br>AdEM/AdWT | Ratio<br>AgEM/AgWT | Ratio<br>AgEM/AdEM | Ratio<br>AgWT/AdWT | Log Ratio<br>AdEM/AdWT | Log Ratio<br>AgEM/AgWT | Log Ratio<br>AgEM/AdEM | Log Ratio<br>AgWT/AdWT | p-value<br>AdEM/AdWT | p-value<br>AgEM/AgWT | p-value<br>AgEM/AdEM | p-value<br>AgWT/AdWT | AdEM Total<br>Spectral Count | AgEM Total<br>Spectral Count | AdWT Total<br>Spectral Count | AgWT Total<br>Spectral Count | AdEMxrep1<br>Normalized SC | AdEMxrep2<br>Normalized SC | AdEMxrep3<br>Normalized SC | AgEMxrep1<br>Normalized SC | AgEMxrep2<br>Normalized SC | AgEMxrep3<br>Normalized SC | AdWTxrep1<br>Normalized SC | AdWTxrep2<br>Normalized SC | AdWTxrep3<br>Normalized SC | AgWTxrep1<br>Normalized SC | AgWTxrep2<br>Normalized SC | AgWTxrep3<br>Normalized SC |
|-------------|------------------------|-------------------------------|-------------|--------------------|--------------------|--------------------|--------------------|------------------------|------------------------|------------------------|------------------------|----------------------|----------------------|----------------------|----------------------|------------------------------|------------------------------|------------------------------|------------------------------|----------------------------|----------------------------|----------------------------|----------------------------|----------------------------|----------------------------|----------------------------|----------------------------|----------------------------|----------------------------|----------------------------|----------------------------|
| TOP PROTEIN | v1 G0C631 G0C63_MOUSE  | Sequence kinase-like 1        | Gyk1        | 1.20               | 1.33               | 0.67               | 0.60               | 0.08                   | 0.12                   | -0.18                  | -0.22                  | 0.725                | 0.643                | 0.492                | 0.374                | 6                            | 4                            | 5                            | 3                            | 3                          | 2                          | 1                          | 2                          | 2                          | 0                          | 1                          | 1                          | 1                          | 1                          | 1                          |                            |
| TOP PROTEIN | v1 G0B701 G0B7_MOUSE   | Copine-1                      | Cpn1        | 0.80               | 0.75               | 1.75               | 0.80               | -0.10                  | 0.24                   | 0.24                   | 0.10                   | 0.678                | 0.101                | 0.031                | 0.678                | 0.4                          | 7                            | 5                            | 4                            | 1                          | 1                          | 2                          | 2                          | 1                          | 2                          | 1                          | 1                          | 2                          | 1                          | 1                          |                            |
| TOP PROTEIN | v1 G0C0C1 G0C0_MOUSE   | Perlecan-1                    | Ptnc1       | 3.27               | 8.33               | 0.69               | 0.27               | -0.51                  | 0.92                   | -0.16                  | -0.56                  | 0.240                | 0.051                | 0.598                | 0.163                | 36                           | 25                           | 11                           | 3                            | 1                          | 14                         | 21                         | 8                          | 1                          | 1                          | 1                          | 1                          | 1                          | 1                          | 1                          |                            |
| TOP PROTEIN | v1 KA0M72 TTC18_MOUSE  | Transcriptional corepressor   | Ttcr18      | 0.883              | 1.00               | 2.40               | 0.67               | -0.08                  | 0.48                   | 0.38                   | -0.18                  | 0.804                | 0.304                | 0.411                | 0.776                | 5                            | 12                           | 6                            | 4                            | 0                          | 5                          | 0                          | 0                          | 0                          | 0                          | 0                          | 0                          | 0                          | 0                          | 0                          |                            |
| TOP PROTEIN | v1 P03177 C02C_MOUSE   | Complexin-1                   | Cxcl1       | 0.73               | 0.00               | 0.94               | 0.68               | -0.14                  | 0.00                   | 0.32                   | -0.17                  | 0.155                | 1.000                | 0.842                | 0.099                | 0.09                         | 18                           | 17                           | 25                           | 17                         | 5                          | 6                          | 3                          | 6                          | 8                          | 9                          | 6                          | 10                         | 6                          | 5                          |                            |
| TOP PROTEIN | v1 Q3772 F04D_MOUSE    | Fumarylacetoacetate hydrolase | Fahd2       | 1.00               | 0.50               | 1.00               | 2.00               | 0.00                   | -0.30                  | 0.00                   | 0.00                   | 1.000                | 0.422                | 1.000                | 0.230                | 2                            | 2                            | 2                            | 4                            | 2                          | 0                          | 0                          | 0                          | 0                          | 0                          | 0                          | 0                          | 0                          | 0                          | 0                          |                            |
| TOP PROTEIN | v1 G0C313 G0C31_MOUSE  | PCD and LIM domain-1          | Pfhd5       | 1.35               | 0.68               | 0.63               | 1.25               | 0.13                   | 0.17                   | -0.20                  | -0.10                  | 0.296                | 0.230                | 0.214                | 0.326                | 27                           | 17                           | 20                           | 25                           | 9                          | 6                          | 12                         | 3                          | 8                          | 6                          | 8                          | 5                          | 7                          | 10                         | 6                          |                            |
| TOP PROTEIN | v1 P08725 G0C31_MOUSE  | Complexin-2                   | Cxcl2       | 1.21               | 0.67               | 1.02               | 1.41               | 0.08                   | -0.06                  | 0.01                   | 0.15                   | 0.442                | 0.330                | 0.275                | 0.219                | 47                           | 48                           | 39                           | 55                           | 17                         | 15                         | 15                         | 16                         | 15                         | 17                         | 7                          | 17                         | 15                         | 18                         | 22                         |                            |
| TOP PROTEIN | v1 G0E700 G0E700_MOUSE | Signal peptidase complex      | Spcc3       | 1.67               | 0.80               | 0.80               | 1.67               | 0.22                   | -0.10                  | 0.10                   | 0.22                   | 0.116                | 0.519                | 0.519                | 0.116                | 5                            | 4                            | 3                            | 5                            | 2                          | 1                          | 1                          | 1                          | 1                          | 1                          | 1                          | 1                          | 1                          | 1                          | 1                          |                            |
| TOP PROTEIN | v1 P46978 TTC18_MOUSE  | Dolichyl-diphosphocholine     | Sctc3       | 1.00               | 1.00               | 0.81               | 0.81               | 0.00                   | 0.00                   | -0.09                  | -0.09                  | 1.000                | 1.000                | 0.205                | 0.329                | 21                           | 17                           | 12                           | 17                           | 6                          | 7                          | 8                          | 5                          | 7                          | 5                          | 7                          | 7                          | 7                          | 8                          | 4                          |                            |
| TOP PROTEIN | v1 G0E420 G0E420_MOUSE | Vesicle coat protein          | Vcan        | 1.17               | 0.80               | 0.80               | 1.08               | 0.07                   | 0.03                   | 0.00                   | 0.03                   | 0.116                | 0.519                | 1.000                | 0.374                | 14                           | 14                           | 12                           | 13                           | 5                          | 4                          | 5                          | 5                          | 5                          | 5                          | 4                          | 4                          | 4                          | 4                          | 5                          |                            |
| TOP PROTEIN | v1 G0Y1C3 F04A_MOUSE   | Eukaryotic initiation factor  | Eif4a3      | 0.62               | 0.93               | 0.78               | 0.68               | -0.03                  | -0.17                  | -0.17                  | -0.17                  | 0.206                | 0.842                | 0.116                | 0.234                | 18                           | 14                           | 22                           | 15                           | 7                          | 8                          | 8                          | 4                          | 5                          | 5                          | 8                          | 6                          | 7                          | 8                          | 4                          |                            |
| TOP PROTEIN | v1 G0E718 TTC18_MOUSE  | Chitinophilin-2               | Chit2       | 0.56               | 0.43               | 2.60               | 0.33               | -0.26                  | 0.64                   | 0.41                   | -0.48                  | 0.469                | 0.100                | 0.171                | 0.288                | 5                            | 13                           | 9                            | 3                            | 1                          | 1                          | 3                          | 7                          | 2                          | 4                          | 2                          | 1                          | 6                          | 2                          | 0                          |                            |
| TOP PROTEIN | v1 P33235 C02C_MOUSE   | Acetyl-coylsomal 2            | Acsl1       | 1.23               | 1.28               | 0.82               | 0.78               | 0.09                   | 0.11                   | 0.09                   | -0.11                  | 0.369                | 0.406                | 0.369                | 0.423                | 1030                         | 841                          | 837                          | 657                          | 340                        | 274                        | 416                        | 300                        | 357                        | 195                        | 340                        | 332                        | 323                        | 182                        | 176                        |                            |
| TOP PROTEIN | v1 G0D039 F0G1_MOUSE   | Phosphoglucomutase            | Pgm1        | 1.29               | 2.00               | 1.12               | 0.78               | 0.14                   | 0.30                   | 0.05                   | -0.11                  | 0.507                | 0.120                | 0.689                | 0.120                | 50                           | 56                           | 36                           | 28                           | 12                         | 17                         | 21                         | 33                         | 22                         | 3                          | 10                         | 23                         | 10                         | 8                          | 10                         |                            |
| TOP PROTEIN | v1 J0K0M5 J0K0M5_MOUSE | Uncharacterized protein       | Tubd4b-p61  | 1.21               | 0.90               | 0.92               | 1.24               | 0.08                   | -0.05                  | -0.04                  | 0.09                   | 0.090                | 0.501                | 0.586                | 0.051                | 227                          | 208                          | 187                          | 231                          | 86                         | 73                         | 68                         | 51                         | 81                         | 76                         | 65                         | 57                         | 65                         | 69                         | 77                         |                            |
| TOP PROTEIN | v1 G0A1E1 G0A1_MOUSE   | Hsp90alpha                    | Hsp90       | 1.84               | 1.88               | 0.67               | 0.39               | 0.08                   | 0.27                   | -0.06                  | -0.41                  | 0.773                | 0.224                | 0.846                | 0.048                | 52                           | 45                           | 62                           | 24                           | 8                          | 9                          | 37                         | 18                         | 21                         | 13                         | 28                         | 13                         | 21                         | 8                          | 10                         |                            |
| TOP PROTEIN | v1 P28651 F0G1_MOUSE   | Myrins/globulin-1             | Mug1        | 1.57               | 1.55               | 0.91               | 0.64               | -0.12                  | 0.19                   | 0.04                   | -0.35                  | 0.588                | 0.206                | 0.844                | 0.120                | 53                           | 48                           | 70                           | 31                           | 6                          | 32                         | 15                         | 12                         | 16                         | 20                         | 19                         | 16                         | 35                         | 6                          | 9                          |                            |
| TOP PROTEIN | v1 H0K717 H0K7_MOUSE   | Myosin-11                     | Myh11       | 1.57               | 0.54               | 0.62               | 1.82               | 0.20                   | -0.27                  | -0.21                  | 0.26                   | 0.340                | 0.104                | 0.291                | 0.142                | 150                          | 1597                         | 996                          | 1018                         | 693                        | 232                        | 612                        | 356                        | 150                        | 130                        | 140                        | 381                        | 97                         | 753                        | 626                        |                            |
| TOP PROTEIN | v1 G0B4E1 G0B4_MOUSE   | Early endosome antigen-2      | Eef2        | 1.00               | 1.00               | 0.81               | 0.81               | 0.00                   | 0.00                   | 0.04                   | -0.04                  | 1.000                | 1.000                | 0.116                | 0.234                | 1                            | 1                            | 1                            | 1                            | 4                          | 4                          | 0                          | 2                          | 5                          | 4                          | 0                          | 2                          | 3                          | 2                          | 0                          |                            |
| TOP PROTEIN | v1 P06711 J0K0_MOUSE   | Spermidine diiminase          | Spdase      | 0.57               | 0.78               | 1.13               | 0.82               | -0.24                  | -0.11                  | 0.05                   | -0.09                  | 0.175                | 0.440                | 0.670                | 0.577                | 16                           | 18                           | 28                           | 23                           | 4                          | 8                          | 4                          | 6                          | 7                          | 5                          | 9                          | 6                          | 13                         | 9                          | 10                         |                            |
| TOP PROTEIN | v1 P67202 H5AK_MOUSE   | 40S ribosomal protein         | Rps4        | 0.59               | 1.22               | 1.47               | 0.95               | -0.10                  | 0.09                   | 0.17                   | -0.02                  | 0.492                | 0.205                | 0.224                | 0.768                | 15                           | 22                           | 19                           | 18                           | 4                          | 8                          | 8                          | 8                          | 8                          | 8                          | 8                          | 8                          | 8                          | 8                          | 8                          |                            |
| TOP PROTEIN | v1 E0YF04 E0YF_MOUSE   | Vesicle coat protein          | Vcan        | 1.35               | 0.74               | 0.81               | 1.35               | 0.13                   | -0.11                  | 0.06                   | 0.20                   | 0.479                | 0.070                | 0.649                | 0.121                | 397                          | 346                          | 294                          | 470                          | 11                         | 81                         | 94                         | 131                        | 140                        | 131                        | 140                        | 131                        | 140                        | 131                        | 140                        |                            |
| TOP PROTEIN | v1 J03Z01 J03Z01_MOUSE | Serbin and SH3 domain         | Serba1      | 0.44               | 1.16               | 1.45               | 0.56               | -0.35                  | 0.06                   | 0.16                   | -0.36                  | 0.117                | 0.768                | 0.517                | 0.186                | 20                           | 29                           | 45                           | 25                           | 4                          | 6                          | 10                         | 17                         | 8                          | 4                          | 16                         | 21                         | 8                          | 11                         | 9                          |                            |
| TOP PROTEIN | v1 G0A111 T02D_MOUSE   | Uncharacterized protein       | Tsrb2       | 0.81               | 1.00               | 0.69               | 0.19               | -0.09                  | 0.48                   | -0.16                  | -0.73                  | 0.709                | 0.288                | 0.561                | 0.109                | 13                           | 9                            | 16                           | 3                            | 7                          | 2                          | 1                          | 1                          | 1                          | 1                          | 1                          | 1                          | 1                          | 1                          | 1                          |                            |
| TOP PROTEIN | v1 G0D048 G0D0_MOUSE   | Sorting nexin-5               | Snx5        | 1.00               | 0.40               | 0.80               | 0.60               | 0.00                   | 0.60                   | 0.36                   | -0.40                  | 1.000                | 0.001                | 0.374                | 0.251                | 0                            | 0                            | 0                            | 0                            | 1                          | 1                          | 1                          | 1                          | 1                          | 1                          | 1                          | 1                          | 1                          | 1                          | 1                          |                            |
| TOP PROTEIN | v1 G0D172 E51_MOUSE    | E51 protein homolog           | O310b10a.1  | 0.95               | 1.13               | 1.53               | 0.95               | -0.02                  | 0.18                   | 0.18                   | -0.02                  | 0.883                | 0.089                | 0.206                | 0.820                | 19                           | 29                           | 20                           | 19                           | 6                          | 10                         | 3                          | 11                         | 8                          | 10                         | 6                          | 6                          | 8                          | 7                          | 4                          |                            |
| TOP PROTEIN | v1 G094C8 H0A5_MOUSE   | von Willebrand factor         | Vwa5a       | 1.71               | 1.14               | 1.60               | 1.00               | -0.15                  | 0.06                   | 0.20                   | 0.00                   | 0.455                | 0.288                | 0.276                | 1.000                | 15                           | 24                           | 21                           | 21                           | 1                          | 1                          | 5                          | 9                          | 8                          | 7                          | 7                          | 6                          | 8                          | 7                          | 4                          |                            |
| TOP PROTEIN | v1 P03187 C02C_MOUSE   | Complexin-2                   | Cxcl2       | 1.30               | 0.48               | 0.81               | 1.30               | 0.08                   | -0.04                  | 0.04                   | -0.08                  | 0.175                | 0.440                | 0.670                | 0.577                | 12                           | 13                           | 20                           | 13                           | 8                          | 10                         | 10                         | 9                          | 11                         | 6                          | 6                          | 7                          | 6                          | 10                         | 7                          |                            |
| TOP PROTEIN | v1 G0U741 G0U741_MOUSE | DEAD (Arg-Glu-Ala) box        | Dad17       | 0.63               | 1.30               | 1.08               | 0.53               | -0.20                  | 0.11                   | 0.03                   | -0.28                  | 0.277                | 0.417                | 0.830                | 0.134                | 12                           | 13                           | 19                           | 10                           | 2                          | 6                          | 4                          | 4                          | 6                          | 4                          | 6                          | 9                          | 4                          | 4                          | 2                          |                            |
| TOP PROTEIN | v1 G0C129 G0C1_MOUSE   | Protein AD-Dependent          | Dad17       | 0.63               | 1.30               | 1.08               | 0.53               | -0.20                  | 0.11                   | 0.03                   | -0.28                  | 0.277                | 0.417                | 0.830                | 0.134                | 12                           | 13                           | 19                           | 10                           | 2                          | 6                          | 4                          | 4                          | 6                          | 4                          | 6                          | 9                          | 4                          | 4                          | 2                          |                            |
| TOP PROTEIN | v1 P44851 P0M3_MOUSE   | 26S proteasome non- $\alpha$  | Psm3        | 1.05               | 1.36               | 0.71               | 0.55               | -0.02                  | 0.13                   | -0.15                  | -0.26                  | 0.917                | 0.275                | 0.407                | 0.272                | 21                           | 15                           | 20                           | 11                           | 4                          | 11                         | 6                          | 5                          | 6                          | 4                          | 4                          | 5                          | 11                         | 4                          | 5                          |                            |
| TOP PROTEIN | v1 G0M313 G0M3_MOUSE   | Striking protein 38c subunit  | Str3c       | 0.36               | 1.26               | 1.63               | 0.63               | -0.13                  | 0.20                   | 0.13                   | -0.20                  | 0.328                | 0.296                | 0.386                | 0.296                | 3                            | 7                            | 19                           | 12                           | 3                          | 4                          | 7                          | 7                          | 8                          | 6                          | 6                          | 6                          | 6                          | 6                          | 6                          |                            |
| TOP PROTEIN | v1 G0D032 G0D0_MOUSE   | Protein AD-Dependent          | Dad17       | 0.63               | 1.30               | 1.08               | 0.53               | -0.20                  | 0.11                   | 0.03                   | -0.28                  | 0.277                | 0.417                | 0.830                | 0.134                | 12                           | 13                           | 19                           | 10                           | 2                          | 6                          | 4                          | 4                          | 6                          | 4                          | 6                          | 9                          | 4                          | 4                          | 2                          |                            |
| TOP PROTEIN | v1 G0D032 G0D0_MOUSE   | Protein AD-Dependent          | Dad17       | 0.63               | 1.30               | 1.08               | 0.53               | -0.20                  | 0.11                   | 0.03                   | -0.28                  | 0.277                | 0.417                | 0.830                |                      |                              |                              |                              |                              |                            |                            |                            |                            |                            |                            |                            |                            |                            |                            |                            |                            |

| Source      | Sequence ID        | Sequence Name             | Gene Symbol        | Ratio AEM/AdNT | Ratio AgM/AgWT | Ratio AgM/AdEM | Ratio AgWT/AdNT | Log Ratio AEM/AdNT | Log Ratio AgM/AgWT | Log Ratio AgM/AdEM | Log Ratio AgWT/AdNT | p-value AEM/AdNT | p-value AgM/AgWT | p-value AgM/AdEM | p-value AgWT/AdNT | AdEM Total Spectral Count | AgM Total Spectral Count | AdWT Total Spectral Count | AgWT Total Spectral Count | AdEMmp1 Normalized SC | AgMmp2 Normalized SC | AdEMmp3 Normalized SC | AgMmp1 Normalized SC | AgMmp2 Normalized SC | AgMmp3 Normalized SC | AdWTmp1 Normalized SC | AdWTmp2 Normalized SC | AdWTmp3 Normalized SC | AgWTmp1 Normalized SC | AgWTmp2 Normalized SC | AgWTmp3 Normalized SC |
|-------------|--------------------|---------------------------|--------------------|----------------|----------------|----------------|-----------------|--------------------|--------------------|--------------------|---------------------|------------------|------------------|------------------|-------------------|---------------------------|--------------------------|---------------------------|---------------------------|-----------------------|----------------------|-----------------------|----------------------|----------------------|----------------------|-----------------------|-----------------------|-----------------------|-----------------------|-----------------------|-----------------------|
| TOP PROTEIN | #P192391A818_MOUSE | Ras-related protein G12   | Rab18              | 1.50           | 0.45           | 0.56           | 1.83            | 0.18               | -0.34              | -0.26              | 0.26                | 0.482            | 0.145            | 0.374            | 0.189             | 5                         | 6                        | 11                        | 5                         | 2                     | 2                    | 2                     | 2                    | 2                    | 2                    | 2                     | 2                     | 2                     | 2                     | 2                     |                       |
| TOP PROTEIN | #P192391A818_MOUSE | Trypsinogen-like 1        | Trypsinogen-like 1 | 0.17           | 1.25           | 0.18           | 0.18            | -0.18              | 0.35               | -0.18              | 0.35                | 0.288            | 0.132            | 0.288            | 0.132             | 9                         | 9                        | 9                         | 9                         | 1                     | 1                    | 1                     | 1                    | 1                    | 1                    | 1                     | 1                     | 1                     | 1                     | 1                     |                       |
| TOP PROTEIN | #P192391A818_MOUSE | Mannan-6-phosphatase      | Man6P              | 0.67           | 2.35           | 1.00           | 0.44            | -0.18              | 0.35               | -0.18              | 0.35                | 0.288            | 0.132            | 0.288            | 0.132             | 6                         | 9                        | 9                         | 9                         | 1                     | 2                    | 3                     | 2                    | 4                    | 3                    | 2                     | 4                     | 2                     | 2                     | 0                     |                       |
| TOP PROTEIN | #P192391A818_MOUSE | Mannan-6-phosphatase      | Man6P              | 0.90           | 2.31           | 0.78           | 0.30            | -0.05              | 0.37               | -0.11              | 0.52                | 0.886            | 0.374            | 0.749            | 0.296             | 9                         | 7                        | 10                        | 3                         | 4                     | 5                    | 0                     | 4                    | 3                    | 2                    | 1                     | 7                     | 2                     | 1                     | 0                     |                       |
| TOP PROTEIN | #P192391A818_MOUSE | Phosphatase               | Phos               | 1.19           | 1.07           | 1.40           | 0.60            | 0.22               | 0.15               | 0.22               | 0.15                | 0.422            | 0.155            | 0.524            | 0.275             | 1                         | 1                        | 1                         | 1                         | 1                     | 1                    | 1                     | 1                    | 1                    | 1                    | 1                     | 1                     | 1                     | 1                     | 1                     |                       |
| TOP PROTEIN | #P192391A818_MOUSE | Catenin alpha-1           | Ctnn1              | 0.87           | 1.09           | 0.90           | 0.71            | -0.06              | 0.44               | -0.05              | -0.15               | 0.558            | 0.449            | 0.565            | 0.231             | 78                        | 70                       | 90                        | 64                        | 22                    | 31                   | 25                    | 30                   | 20                   | 22                   | 41                    | 27                    | 22                    | 25                    | 17                    |                       |
| TOP PROTEIN | #P192391A818_MOUSE | Transcriptional activator | Purb               | 0.57           | 3.00           | 1.50           | 0.29            | -0.24              | 0.48               | -0.18              | -0.54               | 0.101            | 0.205            | 0.374            | 0.089             | 4                         | 6                        | 7                         | 2                         | 2                     | 1                    | 1                     | 1                    | 1                    | 3                    | 2                     | 2                     | 2                     | 0                     | 2                     |                       |
| TOP PROTEIN | #P192391A818_MOUSE | Hemoglobin subunit alpha  | Hbalpha            | 1.83           | 2.17           | 1.40           | 0.60            | 0.22               | 0.15               | 0.22               | 0.15                | 0.422            | 0.155            | 0.524            | 0.275             | 1                         | 1                        | 1                         | 1                         | 1                     | 1                    | 1                     | 1                    | 1                    | 1                    | 1                     | 1                     | 1                     | 1                     | 1                     |                       |
| TOP PROTEIN | #P192391A818_MOUSE | Myosin-8                  | Myh8               | 0.85           | 0.91           | 1.21           | 0.86            | -0.19              | 0.04               | 0.08               | -0.07               | 0.209            | 0.709            | 0.491            | 0.588             | 307                       | 372                      | 473                       | 407                       | 105                   | 84                   | 118                   | 171                  | 123                  | 78                   | 123                   | 121                   | 229                   | 156                   | 117                   |                       |
| TOP PROTEIN | #P192391A818_MOUSE | Transcriptional activator | Gart               | 1.13           | 1.57           | 1.22           | 0.86            | 0.05               | 0.20               | 0.09               | -0.06               | 0.725            | 0.148            | 0.462            | 0.678             | 3                         | 3                        | 4                         | 8                         | 7                     | 3                    | 4                     | 2                    | 3                    | 5                    | 2                     | 2                     | 4                     | 2                     | 3                     |                       |
| TOP PROTEIN | #P192391A818_MOUSE | TP-dependent RNA 1        | TP-dependent RNA 1 | 0.18           | 0.71           | 0.67           | 0.77            | -0.09              | 0.07               | -0.11              | 0.18                | 0.512            | 0.087            | 0.577            | 0.101             | 18                        | 20                       | 22                        | 22                        | 6                     | 14                   | 16                    | 12                   | 17                   | 12                   | 17                    | 12                    | 17                    | 12                    | 17                    |                       |
| TOP PROTEIN | #P192391A818_MOUSE | Formin-3 of Reticulon     | Rtn3               | 1.06           | 1.30           | 0.68           | 0.56            | 0.02               | 0.11               | -0.16              | -0.26               | 0.902            | 0.624            | 0.489            | 0.205             | 19                        | 13                       | 18                        | 10                        | 11                    | 4                    | 4                     | 5                    | 6                    | 2                    | 7                     | 7                     | 4                     | 1                     | 6                     |                       |
| TOP PROTEIN | #P192391A818_MOUSE | Corticosteroid binding    | Serpin             | 0.00           | NA             | NA             | 0.00            | NA                 | NA                 | NA                 | NA                  | 0.374            | 0.158            | 0.158            | 0.374             | 0                         | 3                        | 3                         | 0                         | 0                     | 0                    | 0                     | 0                    | 2                    | 1                    | 3                     | 0                     | 0                     | 0                     | 0                     |                       |
| TOP PROTEIN | #P192391A818_MOUSE | Thrombospondin-1          | Tsfn1              | 1.82           | 1.18           | 0.71           | 0.77            | -0.09              | 0.07               | -0.11              | 0.18                | 0.512            | 0.087            | 0.577            | 0.101             | 18                        | 20                       | 22                        | 22                        | 6                     | 14                   | 16                    | 12                   | 17                   | 12                   | 17                    | 12                    | 17                    | 12                    | 17                    |                       |
| TOP PROTEIN | #P192391A818_MOUSE | Short-chain specific ac   | Acad               | 0.54           | 0.78           | 0.93           | 0.64            | -0.27              | -0.11              | -0.03              | -0.19               | 0.238            | 0.587            | 0.815            | 0.409             | 15                        | 14                       | 28                        | 18                        | 3                     | 6                    | 6                     | 5                    | 6                    | 5                    | 5                     | 15                    | 5                     | 10                    | 3                     |                       |
| TOP PROTEIN | #P192391A818_MOUSE | Nectin                    | Nctn               | 0.62           | 1.22           | 1.38           | 0.69            | -0.23              | 0.09               | -0.14              | -0.16               | 0.292            | 0.374            | 0.101            | 0.411             | 8                         | 11                       | 13                        | 9                         | 2                     | 3                    | 3                     | 4                    | 3                    | 4                    | 3                     | 7                     | 2                     | 3                     | 3                     |                       |
| TOP PROTEIN | #P192391A818_MOUSE | Gamma-2 of Ig gamma       | Ighg2              | 0.85           | 0.83           | 1.60           | 0.86            | -0.11              | 0.60               | -0.11              | 0.60                | 0.275            | 0.155            | 0.524            | 0.275             | 1                         | 1                        | 1                         | 1                         | 1                     | 1                    | 1                     | 1                    | 1                    | 1                    | 1                     | 1                     | 1                     | 1                     | 1                     |                       |
| TOP PROTEIN | #P192391A818_MOUSE | Torin-2 of Ig gamma       | Ighg2              | 0.85           | 0.83           | 1.26           | 1.30            | -0.07              | 0.08               | -0.10              | -0.11               | 0.692            | 0.279            | 0.456            | 0.353             | 23                        | 29                       | 27                        | 35                        | 4                     | 7                    | 12                    | 9                    | 11                   | 9                    | 13                    | 8                     | 6                     | 14                    | 9                     |                       |
| TOP PROTEIN | #P192391A818_MOUSE | Torin-1 interacting       | Tor1ip             | 1.45           | 1.15           | 0.72           | 0.91            | 0.16               | 0.06               | -0.14              | -0.04               | 0.273            | 0.417            | 0.152            | 0.785             | 32                        | 23                       | 22                        | 20                        | 8                     | 11                   | 13                    | 9                    | 6                    | 8                    | 9                     | 10                    | 3                     | 6                     | 8                     |                       |
| TOP PROTEIN | #P192391A818_MOUSE | Torin-1 interacting       | Tor1ip             | 1.45           | 1.15           | 0.72           | 0.91            | 0.16               | 0.06               | -0.14              | -0.04               | 0.273            | 0.417            | 0.152            | 0.785             | 32                        | 23                       | 22                        | 20                        | 8                     | 11                   | 13                    | 9                    | 6                    | 8                    | 9                     | 10                    | 3                     | 6                     | 8                     |                       |
| TOP PROTEIN | #P192391A818_MOUSE | 3-hydroxyisobutyryl       | Hibh               | 0.83           | 1.62           | 1.11           | 0.57            | -0.08              | 0.21               | 0.04               | -0.25               | 0.660            | 0.065            | 0.759            | 0.206             | 19                        | 21                       | 23                        | 13                        | 3                     | 7                    | 9                     | 9                    | 6                    | 6                    | 5                     | 6                     | 12                    | 4                     | 5                     |                       |
| TOP PROTEIN | #P192391A818_MOUSE | Endothelial cell select   | Ecsc               | 0.83           | 0.80           | 1.40           | 0.67            | -0.08              | 0.10               | 0.20               | 0.22                | 0.725            | 0.519            | 0.417            | 0.136             | 5                         | 8                        | 6                         | 10                        | 3                     | 2                    | 0                     | 2                    | 2                    | 4                    | 2                     | 2                     | 4                     | 3                     | 4                     |                       |
| TOP PROTEIN | #P192391A818_MOUSE | 60S acidic ribosomal p    | Rplp0              | 1.08           | 0.71           | 0.87           | 0.71            | 0.34               | 0.06               | 0.11               | 0.74                | 0.146            | 0.560            | 0.374            | 0.101             | 40                        | 35                       | 37                        | 48                        | 13                    | 14                   | 12                    | 17                   | 12                   | 17                   | 12                    | 17                    | 12                    | 17                    | 12                    |                       |
| TOP PROTEIN | #P192391A818_MOUSE | Flotillin-1               | Flot1              | 1.04           | 1.00           | 1.24           | 1.29            | 0.02               | 0.00               | 0.09               | 0.11                | 0.872            | 1.000            | 0.219            | 0.296             | 25                        | 31                       | 24                        | 31                        | 9                     | 10                   | 6                     | 11                   | 11                   | 9                    | 5                     | 9                     | 11                    | 12                    | 8                     |                       |
| TOP PROTEIN | #P192391A818_MOUSE | Flotillin-2               | Flot2              | 1.83           | 1.00           | 0.71           | 1.33            | 0.26               | 0.00               | -0.14              | 0.13                | 0.867            | 1.000            | 0.468            | 0.374             | 11                        | 8                        | 8                         | 7                         | 3                     | 4                    | 2                     | 1                    | 3                    | 4                    | 2                     | 1                     | 3                     | 2                     | 3                     |                       |
| TOP PROTEIN | #P192391A818_MOUSE | Aspartylglucosylamin      | Asph               | 1.11           | 1.15           | 0.86           | 0.71            | 0.07               | 0.00               | -0.13              | -0.13               | 0.512            | 0.087            | 0.577            | 0.101             | 42                        | 31                       | 38                        | 27                        | 14                    | 13                   | 15                    | 14                   | 12                   | 5                    | 10                    | 16                    | 12                    | 13                    | 10                    |                       |
| TOP PROTEIN | #P192391A818_MOUSE | Aspartylglucosylamin      | Asph               | 1.11           | 1.15           | 0.74           | 0.71            | 0.04               | 0.06               | -0.13              | -0.15               | 0.512            | 0.743            | 0.259            | 0.313             | 42                        | 31                       | 38                        | 27                        | 14                    | 13                   | 15                    | 14                   | 12                   | 5                    | 10                    | 16                    | 12                    | 13                    | 10                    |                       |
| TOP PROTEIN | #P192391A818_MOUSE | ATP synthase subunit      | Atp5f1             | 1.80           | 1.81           | 1.07           | 0.95            | 0.21               | 0.26               | 0.03               | 0.25                | 0.939            | 0.197            | 0.875            | 0.847             | 130                       | 139                      | 81                        | 77                        | 20                    | 61                   | 45                    | 56                   | 3                    | 22                   | 25                    | 34                    | 18                    | 26                    | 23                    |                       |
| TOP PROTEIN | #P192391A818_MOUSE | Carbonic dehydratase      | Cbr                | 1.00           | 1.00           | 1.00           | 1.00            | 0.00               | 0.00               | 0.00               | 0.00                | 0.374            | 1.000            | 0.374            | 1.000             | 0                         | 6                        | 6                         | 6                         | 0                     | 0                    | 0                     | 0                    | 0                    | 0                    | 0                     | 0                     | 0                     | 0                     | 0                     |                       |
| TOP PROTEIN | #P192391A818_MOUSE | Actin-binding LIM pro     | Abim1              | 1.00           | 1.00           | 1.00           | 1.00            | 0.00               | 0.00               | 0.00               | 0.00                | 0.374            | 1.000            | 0.374            | 1.000             | 0                         | 6                        | 6                         | 6                         | 0                     | 0                    | 0                     | 0                    | 0                    | 0                    | 0                     | 0                     | 0                     | 0                     | 0                     |                       |
| TOP PROTEIN | #P192391A818_MOUSE | Glycine nucleotide-bi     | Gnab1              | 1.56           | 0.71           | 0.71           | 1.56            | 0.12               | 0.08               | -0.05              | -0.13               | 0.678            | 0.539            | 0.507            | 0.157             | 20                        | 17                       | 19                        | 14                        | 6                     | 7                    | 7                     | 7                    | 7                    | 7                    | 7                     | 7                     | 4                     | 6                     | 4                     |                       |
| TOP PROTEIN | #P192391A818_MOUSE | Phenylalanyl-tRNA         | Facp1              | 1.06           | 0.71           | 0.71           | 1.06            | 0.12               | 0.08               | -0.05              | -0.13               | 0.678            | 0.539            | 0.507            | 0.157             | 20                        | 17                       | 19                        | 14                        | 6                     | 7                    | 7                     | 7                    | 7                    | 7                    | 7                     | 7                     | 4                     | 6                     | 4                     |                       |
| TOP PROTEIN | #P192391A818_MOUSE | Thrombospondin-3          | Thbs3              | 0.72           | 1.50           | 1.38           | 0.67            | 0.14               | 0.18               | -0.14              | -0.18               | 0.440            | 0.070            | 0.279            | 0.288             | 13                        | 18                       | 18                        | 12                        | 2                     | 5                    | 6                     | 7                    | 5                    | 6                    | 4                     | 9                     | 5                     | 5                     | 4                     |                       |
| TOP PROTEIN | #P192391A818_MOUSE | Thrombospondin-3          | Thbs3              | 0.72           | 1.50           | 1.38           | 0.67            | 0.14               | 0.18               | -0.14              | -0.18               | 0.440            | 0.070            | 0.279            | 0.288             | 13                        | 18                       | 18                        | 12                        | 2                     | 5                    | 6                     | 7                    | 5                    | 6                    | 4                     | 9                     | 5                     | 5                     | 4                     |                       |
| TOP PROTEIN | #P192391A818_MOUSE | 25S ribosomal prot        | Rplp2              | 0.72           | 1.50           | 1.38           | 0.67            | 0.14               | 0.18               | -0.14              | -0.18               | 0.440            | 0.070            | 0.279            | 0.288             | 13                        | 18                       | 18                        | 12                        | 2                     | 5                    | 6                     | 7                    | 5                    | 6                    | 4                     | 9                     | 5                     | 5                     | 4                     |                       |
| TOP PROTEIN | #P192391A818_MOUSE | 25S ribosomal prot        | Rplp2              | 0.72           | 1.50           | 1.38           | 0.67            | 0.14               | 0.18               | -0.14              | -0.18               | 0.440            | 0.070            | 0.279            | 0.288             | 13                        | 18                       | 18                        | 12                        | 2                     | 5                    | 6                     | 7                    | 5                    | 6                    | 4                     | 9                     | 5                     | 5                     | 4                     |                       |
| TOP PROTEIN | #P192391A818_MOUSE | Glycine                   | Gpc1               | 0.76           | 1.41           | 1.04           | 0.52            | -0.12              | 0.16               | 0.00               | -0.28               | 0.488            | 0.427            | 1.000            | 0.189             | 16                        | 16                       | 21                        | 11                        | 6                     | 6                    | 4                     | 4                    | 9                    | 3                    | 4                     | 11                    | 4                     | 3                     | 4                     |                       |
| TOP PROTEIN | #P192391A818_MOUSE | Glycine                   | Gpc1               | 0.76           | 1.41           | 1.04           | 0.52            | -0.12              | 0.16               | 0.00               | -0.28               | 0.488            | 0.427            | 1.000            | 0.189             | 16                        | 16                       | 21                        | 11                        | 6                     | 6                    | 4                     | 4                    | 9                    | 3                    | 4                     | 11                    | 4                     | 3                     | 4                     |                       |
| TOP PROTEIN | #P192391A818_MOUSE | Glycine nucleotide-bi     | Gnab1              | 1.56           | 0.71           | 0.71           | 1.56            | 0.12               | 0.08               | -0.05              | -0.13               | 0.678            | 0.539            | 0.507            | 0.157             | 20                        | 17                       | 19                        | 14                        | 6                     | 7                    | 7                     | 7                    | 7                    | 7                    | 7                     | 7                     | 4                     | 6                     | 4                     |                       |
| TOP PROTEIN | #P192391A818_MOUSE | ATP-binding cassette      | Abcc2              | 1.25           | 1.25           | 1.00           | 1.00            | 0.10               | 0.10               | 0.00               | 0.00                | 0.288            | 0.288            | 1.000            | 1.000             | 15                        | 15                       | 12                        | 12                        | 5                     | 4                    | 4                     | 5                    | 4                    | 5                    | 4                     | 5                     | 3                     | 5                     | 4                     |                       |
| TOP PROTEIN | #P192391A818_MOUSE | Lysyl endopeptidase       | Lov1               | 1.63           | 0.50           | 0.69           | 0.25            | 0.21               | 0.65               | -0.16              | -0.60               | 0.519            | 0.091            | 0.587            | 0.184             | 13                        | 9                        | 8                         | 2                         | 1                     | 4                    | 8                     | 5                    | 2                    | 2                    | 2                     | 5                     | 1                     | 1                     | 0                     |                       |
| TOP PROTEIN | #P192391A818_MOUSE | Lysyl endopeptidase       | Lov1               | 1.63           | 0.50           | 0.69           | 0.25            | 0.21               | 0.65               | -0.16              | -0.60               | 0.519            | 0.091            | 0.587            | 0.184             | 13                        | 9                        | 8                         | 2                         | 1                     | 4                    | 8                     | 5                    | 2                    | 2                    | 2                     | 5                     | 1                     | 1                     | 0                     |                       |
| TOP PROTEIN | #P192391A818_MOUSE | Lysyl endopeptidase       | Lov1               | 1.63           | 0.50           | 0.69           | 0.25            | 0.21               | 0.65               | -0.16              | -0.60               | 0.519            | 0.091            | 0.587            | 0.184             | 13                        | 9                        | 8                         | 2                         | 1                     | 4                    | 8                     | 5                    | 2                    | 2                    | 2                     | 5                     | 1                     | 1                     | 0                     |                       |
| TOP PROTEIN | #P192391A818_MOUSE | Lysyl endopeptidase       | Lov1               | 1.63           | 0.50           | 0.69           | 0.25            | 0.21               | 0.65               | -0.16              | -0.60               | 0.519            | 0.091            | 0.587            | 0.184             | 13                        | 9                        | 8                         | 2                         | 1                     | 4                    | 8                     | 5                    | 2                    | 2                    | 2                     | 5                     | 1                     | 1                     | 0                     |                       |
| TOP PROTEIN | #P192391A818_MOUSE | Lysyl endopeptidase       | Lov1               | 1.63           | 0.50           | 0.69           | 0.25            | 0.21               | 0.65               | -0.16              | -0.60               | 0.519            | 0.091            | 0.587            | 0.184             | 13                        | 9                        | 8                         | 2                         | 1                     | 4                    | 8                     | 5                    | 2                    | 2                    | 2                     | 5                     | 1                     | 1                     | 0                     |                       |
| TOP PROTEIN | #P192391A818_MOUSE | Lysyl endopeptidase       | Lov1               | 1.63           | 0.50           | 0.69           | 0.25            | 0.21               | 0.65               | -0.16              | -0.60               | 0.519            | 0.091            | 0.587            | 0.184             | 13                        | 9                        | 8                         | 2                         | 1                     | 4                    | 8                     | 5                    | 2                    | 2                    | 2                     | 5                     | 1                     | 1                     | 0                     |                       |
| TOP PROTEIN | #P192391A818_MOUSE | Lysyl endopeptidase       | Lov1               | 1.63           | 0.50           | 0.69           | 0.25            | 0.21               | 0.65               | -0.16              | -0.60               | 0.519            | 0.091            | 0.587            | 0.184             | 13                        | 9                        | 8                         | 2                         | 1                     | 4                    | 8                     | 5                    | 2                    | 2                    | 2                     | 5                     | 1                     | 1                     | 0                     |                       |
| TOP PROTEIN |                    |                           |                    |                |                |                |                 |                    |                    |                    |                     |                  |                  |                  |                   |                           |                          |                           |                           |                       |                      |                       |                      |                      |                      |                       |                       |                       |                       |                       |                       |

|             | Ratio              | Ratio              | Ratio    | Ratio     | Log Ratio | Log Ratio | Log Ratio | Log Ratio | p-value | p-value | p-value | p-value | AdEM Total     | AdAG Total     | AdMT Total     | AdWT Total     | AdEMrp1    | AdEMrp2    | AdEMrp3    | AdMTrp1    | AdMTrp2    | AdMTrp3    | AdWTrp1    | AdWTrp2    | AdWTrp3    | AdWTrp1    | AdWTrp2    | AdWTrp3    |
|-------------|--------------------|--------------------|----------|-----------|-----------|-----------|-----------|-----------|---------|---------|---------|---------|----------------|----------------|----------------|----------------|------------|------------|------------|------------|------------|------------|------------|------------|------------|------------|------------|------------|
| Source      | AdEM/AGWT          | AdEM/AGWT          | AdEM/ADM | AdEM/ADWT | Log Ratio | Log Ratio | Log Ratio | Log Ratio | p-value | p-value | p-value | p-value | Spectral Count | Spectral Count | Spectral Count | Spectral Count | Normalized |
| TOP PROTEIN | sp P60181 H3_MOUSE | H3 complex protein | H3       | 1.13      | 1.00      | 0.67      | 0.00      | -0.18     | 0.00    | 0.00    | 0.00    | 0.643   | 1.000          | 0.643          | 1.000          | 3              | 2          | 2          | 2          | 2          | 1          | 1          | 1          | 1          | 1          | 1          | 1          | 1          |
| TOP PROTEIN | sp P60181 H3_MOUSE | H3 complex protein | H3       | 1.13      | 1.00      | 0.67      | 0.00      | -0.18     | 0.00    | 0.00    | 0.00    | 0.643   | 1.000          | 0.643          | 1.000          | 3              | 2          | 2          | 2          | 2          | 1          | 1          | 1          | 1          | 1          | 1          | 1          | 1          |
| TOP PROTEIN | sp P60181 H3_MOUSE | H3 complex protein | H3       | 1.13      | 1.00      | 0.67      | 0.00      | -0.18     | 0.00    | 0.00    | 0.00    | 0.643   | 1.000          | 0.643          | 1.000          | 3              | 2          | 2          | 2          | 2          | 1          | 1          | 1          | 1          | 1          | 1          | 1          | 1          |
| TOP PROTEIN | sp P60181 H3_MOUSE | H3 complex protein | H3       | 1.13      | 1.00      | 0.67      | 0.00      | -0.18     | 0.00    | 0.00    | 0.00    | 0.643   | 1.000          | 0.643          | 1.000          | 3              | 2          | 2          | 2          | 2          | 1          | 1          | 1          | 1          | 1          | 1          | 1          | 1          |
| TOP PROTEIN | sp P60181 H3_MOUSE | H3 complex protein | H3       | 1.13      | 1.00      | 0.67      | 0.00      | -0.18     | 0.00    | 0.00    | 0.00    | 0.643   | 1.000          | 0.643          | 1.000          | 3              | 2          | 2          | 2          | 2          | 1          | 1          | 1          | 1          | 1          | 1          | 1          | 1          |
| TOP PROTEIN | sp P60181 H3_MOUSE | H3 complex protein | H3       | 1.13      | 1.00      | 0.67      | 0.00      | -0.18     | 0.00    | 0.00    | 0.00    | 0.643   | 1.000          | 0.643          | 1.000          | 3              | 2          | 2          | 2          | 2          | 1          | 1          | 1          | 1          | 1          | 1          | 1          | 1          |
| TOP PROTEIN | sp P60181 H3_MOUSE | H3 complex protein | H3       | 1.13      | 1.00      | 0.67      | 0.00      | -0.18     | 0.00    | 0.00    | 0.00    | 0.643   | 1.000          | 0.643          | 1.000          | 3              | 2          | 2          | 2          | 2          | 1          | 1          | 1          | 1          | 1          | 1          | 1          | 1          |
| TOP PROTEIN | sp P60181 H3_MOUSE | H3 complex protein | H3       | 1.13      | 1.00      | 0.67      | 0.00      | -0.18     | 0.00    | 0.00    | 0.00    | 0.643   | 1.000          | 0.643          | 1.000          | 3              | 2          | 2          | 2          | 2          | 1          | 1          | 1          | 1          | 1          | 1          | 1          | 1          |
| TOP PROTEIN | sp P60181 H3_MOUSE | H3 complex protein | H3       | 1.13      | 1.00      | 0.67      | 0.00      | -0.18     | 0.00    | 0.00    | 0.00    | 0.643   | 1.000          | 0.643          | 1.000          | 3              | 2          | 2          | 2          | 2          | 1          | 1          | 1          | 1          | 1          | 1          | 1          | 1          |
| TOP PROTEIN | sp P60181 H3_MOUSE | H3 complex protein | H3       | 1.13      | 1.00      | 0.67      | 0.00      | -0.18     | 0.00    | 0.00    | 0.00    | 0.643   | 1.000          | 0.643          | 1.000          | 3              | 2          | 2          | 2          | 2          | 1          | 1          | 1          | 1          | 1          | 1          | 1          | 1          |
| TOP PROTEIN | sp P60181 H3_MOUSE | H3 complex protein | H3       | 1.13      | 1.00      | 0.67      | 0.00      | -0.18     | 0.00    | 0.00    | 0.00    | 0.643   | 1.000          | 0.643          | 1.000          | 3              | 2          | 2          | 2          | 2          | 1          | 1          | 1          | 1          | 1          | 1          | 1          | 1          |
| TOP PROTEIN | sp P60181 H3_MOUSE | H3 complex protein | H3       | 1.13      | 1.00      | 0.67      | 0.00      | -0.18     | 0.00    | 0.00    | 0.00    | 0.643   | 1.000          | 0.643          | 1.000          | 3              | 2          | 2          | 2          | 2          | 1          | 1          | 1          | 1          | 1          | 1          | 1          | 1          |
| TOP PROTEIN | sp P60181 H3_MOUSE | H3 complex protein | H3       | 1.13      | 1.00      | 0.67      | 0.00      | -0.18     | 0.00    | 0.00    | 0.00    | 0.643   | 1.000          | 0.643          | 1.000          | 3              | 2          | 2          | 2          | 2          | 1          | 1          | 1          | 1          | 1          | 1          | 1          | 1          |
| TOP PROTEIN | sp P60181 H3_MOUSE | H3 complex protein | H3       | 1.13      | 1.00      | 0.67      | 0.00      | -0.18     | 0.00    | 0.00    | 0.00    | 0.643   | 1.000          | 0.643          | 1.000          | 3              | 2          | 2          | 2          | 2          | 1          | 1          | 1          | 1          | 1          | 1          | 1          | 1          |
| TOP PROTEIN | sp P60181 H3_MOUSE | H3 complex protein | H3       | 1.13      | 1.00      | 0.67      | 0.00      | -0.18     | 0.00    | 0.00    | 0.00    | 0.643   | 1.000          | 0.643          | 1.000          | 3              | 2          | 2          | 2          | 2          | 1          | 1          | 1          | 1          | 1          | 1          | 1          | 1          |
| TOP PROTEIN | sp P60181 H3_MOUSE | H3 complex protein | H3       | 1.13      | 1.00      | 0.67      | 0.00      | -0.18     | 0.00    | 0.00    | 0.00    | 0.643   | 1.000          | 0.643          | 1.000          | 3              | 2          | 2          | 2          | 2          | 1          | 1          | 1          | 1          | 1          | 1          | 1          | 1          |
| TOP PROTEIN | sp P60181 H3_MOUSE | H3 complex protein | H3       | 1.13      | 1.00      | 0.67      | 0.00      | -0.18     | 0.00    | 0.00    | 0.00    | 0.643   | 1.000          | 0.643          | 1.000          | 3              | 2          | 2          | 2          | 2          | 1          | 1          | 1          | 1          | 1          | 1          | 1          | 1          |
| TOP PROTEIN | sp P60181 H3_MOUSE | H3 complex protein | H3       | 1.13      | 1.00      | 0.67      | 0.00      | -0.18     | 0.00    | 0.00    | 0.00    | 0.643   | 1.000          | 0.643          | 1.000          | 3              | 2          | 2          | 2          | 2          | 1          | 1          | 1          | 1          | 1          | 1          | 1          | 1          |
| TOP PROTEIN | sp P60181 H3_MOUSE | H3 complex protein | H3       | 1.13      | 1.00      | 0.67      | 0.00      | -0.18     | 0.00    | 0.00    | 0.00    | 0.643   | 1.000          | 0.643          | 1.000          | 3              | 2          | 2          | 2          | 2          | 1          | 1          | 1          | 1          | 1          | 1          | 1          | 1          |
| TOP PROTEIN | sp P60181 H3_MOUSE | H3 complex protein | H3       | 1.13      | 1.00      | 0.67      | 0.00      | -0.18     | 0.00    | 0.00    | 0.00    | 0.643   | 1.000          | 0.643          | 1.000          | 3              | 2          | 2          | 2          | 2          | 1          | 1          | 1          | 1          | 1          | 1          | 1          | 1          |
| TOP PROTEIN | sp P60181 H3_MOUSE | H3 complex protein | H3       | 1.13      | 1.00      | 0.67      | 0.00      | -0.18     | 0.00    | 0.00    | 0.00    | 0.643   | 1.000          | 0.643          | 1.000          | 3              | 2          | 2          | 2          | 2          | 1          | 1          | 1          | 1          | 1          | 1          | 1          | 1          |
| TOP PROTEIN | sp P60181 H3_MOUSE | H3 complex protein | H3       | 1.13      | 1.00      | 0.67      | 0.00      | -0.18     | 0.00    | 0.00    | 0.00    | 0.643   | 1.000          | 0.643          | 1.000          | 3              | 2          | 2          | 2          | 2          | 1          | 1          | 1          | 1          | 1          | 1          | 1          | 1          |
| TOP PROTEIN | sp P60181 H3_MOUSE | H3 complex protein | H3       | 1.13      | 1.00      | 0.67      | 0.00      | -0.18     | 0.00    | 0.00    | 0.00    | 0.643   | 1.000          | 0.643          | 1.000          | 3              | 2          | 2          | 2          | 2          | 1          | 1          | 1          | 1          | 1          | 1          | 1          | 1          |
| TOP PROTEIN | sp P60181 H3_MOUSE | H3 complex protein | H3       | 1.13      | 1.00      | 0.67      | 0.00      | -0.18     | 0.00    | 0.00    | 0.00    | 0.643   | 1.000          | 0.643          | 1.000          | 3              | 2          | 2          | 2          | 2          | 1          | 1          | 1          | 1          | 1          | 1          | 1          | 1          |
| TOP PROTEIN | sp P60181 H3_MOUSE | H3 complex protein | H3       | 1.13      | 1.00      | 0.67      | 0.00      | -0.18     | 0.00    | 0.00    | 0.00    | 0.643   | 1.000          | 0.643          | 1.000          | 3              | 2          | 2          | 2          | 2          | 1          | 1          | 1          | 1          | 1          | 1          | 1          | 1          |
| TOP PROTEIN | sp P60181 H3_MOUSE | H3 complex protein | H3       | 1.13      | 1.00      | 0.67      | 0.00      | -0.18     | 0.00    | 0.00    | 0.00    | 0.643   | 1.000          | 0.643          | 1.000          | 3              | 2          | 2          | 2          | 2          | 1          | 1          | 1          | 1          | 1          | 1          | 1          | 1          |
| TOP PROTEIN | sp P60181 H3_MOUSE | H3 complex protein | H3       | 1.13      | 1.00      | 0.67      | 0.00      | -0.18     | 0.00    | 0.00    | 0.00    | 0.643   | 1.000          | 0.643          | 1.000          | 3              | 2          | 2          | 2          | 2          | 1          | 1          | 1          | 1          | 1          | 1          | 1          | 1          |
| TOP PROTEIN | sp P60181 H3_MOUSE | H3 complex protein | H3       | 1.13      | 1.00      | 0.67      | 0.00      | -0.18     | 0.00    | 0.00    | 0.00    | 0.643   | 1.000          | 0.643          | 1.000          | 3              | 2          | 2          | 2          | 2          | 1          | 1          | 1          | 1          | 1          | 1          | 1          | 1          |
| TOP PROTEIN | sp P60181 H3_MOUSE | H3 complex protein | H3       | 1.13      | 1.00      | 0.67      | 0.00      | -0.18     | 0.00    | 0.00    | 0.00    | 0.643   | 1.000          | 0.643          | 1.000          | 3              | 2          | 2          | 2          | 2          | 1          | 1          | 1          | 1          | 1          | 1          | 1          | 1          |
| TOP PROTEIN | sp P60181 H3_MOUSE | H3 complex protein | H3       | 1.13      | 1.00      | 0.67      | 0.00      | -0.18     | 0.00    | 0.00    | 0.00    | 0.643   | 1.000          | 0.643          | 1.000          | 3              | 2          | 2          | 2          | 2          | 1          | 1          | 1          | 1          | 1          | 1          | 1          | 1          |
| TOP PROTEIN | sp P60181 H3_MOUSE | H3 complex protein | H3       | 1.13      | 1.00      | 0.67      | 0.00      | -0.18     | 0.00    | 0.00    | 0.00    | 0.643   | 1.000          | 0.643          | 1.000          | 3              | 2          | 2          | 2          | 2          | 1          | 1          | 1          | 1          | 1          | 1          | 1          | 1          |
| TOP PROTEIN | sp P60181 H3_MOUSE | H3 complex protein | H3       | 1.13      | 1.00      | 0.67      | 0.00      | -0.18     | 0.00    | 0.00    | 0.00    | 0.643   | 1.000          | 0.643          | 1.000          | 3              | 2          | 2          | 2          | 2          | 1          | 1          | 1          | 1          | 1          | 1          | 1          | 1          |
| TOP PROTEIN | sp P60181 H3_MOUSE | H3 complex protein | H3       | 1.13      | 1.00      | 0.67      | 0.00      | -0.18     | 0.00    | 0.00    | 0.00    | 0.643   | 1.000          | 0.643          | 1.000          | 3              | 2          | 2          | 2          | 2          | 1          | 1          | 1          | 1          | 1          | 1          | 1          | 1          |
| TOP PROTEIN | sp P60181 H3_MOUSE | H3 complex protein | H3       | 1.13      | 1.00      | 0.67      | 0.00      | -0.18     | 0.00    | 0.00    | 0.00    | 0.643   | 1.000          | 0.643          | 1.000          | 3              | 2          | 2          | 2          | 2          | 1          | 1          | 1          | 1          | 1          | 1          | 1          | 1          |
| TOP PROTEIN | sp P60181 H3_MOUSE | H3 complex protein | H3       | 1.13      | 1.00      | 0.67      | 0.00      | -0.18     | 0.00    | 0.00    | 0.00    | 0.643   | 1.000          | 0.643          | 1.000          | 3              | 2          | 2          | 2          | 2          | 1          | 1          | 1          | 1          | 1          | 1          | 1          | 1          |
| TOP PROTEIN | sp P60181 H3_MOUSE | H3 complex protein | H3       | 1.13      | 1.00      | 0.67      | 0.00      | -0.18     | 0.00    | 0.00    | 0.00    | 0.643   | 1.000          | 0.643          | 1.000          | 3              | 2          | 2          | 2          | 2          | 1          | 1          | 1          | 1          | 1          | 1          | 1          | 1          |
| TOP PROTEIN | sp P60181 H3_MOUSE | H3 complex protein | H3       | 1.13      | 1.00      | 0.67      | 0.00      | -0.18     | 0.00    | 0.00    | 0.00    | 0.643   | 1.000          | 0.643          | 1.000          | 3              | 2          | 2          | 2          | 2          | 1          | 1          | 1          | 1          | 1          | 1          | 1          | 1          |
| TOP PROTEIN | sp P60181 H3_MOUSE | H3 complex protein | H3       | 1.13      | 1.00      | 0.67      | 0.00      | -0.18     | 0.00    | 0.00    | 0.00    | 0.643   | 1.000          | 0.643          | 1.000          | 3              | 2          | 2          | 2          | 2          | 1          | 1          | 1          | 1          | 1          | 1          | 1          | 1          |
| TOP PROTEIN | sp P60181 H3_MOUSE | H3 complex protein | H3       | 1.13      | 1.00      | 0.67      | 0.00      | -0.18     | 0.00    | 0.00    | 0.00    | 0.643   | 1.000          | 0.643          | 1.000          | 3              | 2          | 2          | 2          | 2          | 1          | 1          | 1          | 1          | 1          | 1          | 1          | 1          |
| TOP PROTEIN | sp P60181 H3_MOUSE | H3 complex protein | H3       | 1.13      | 1.00      | 0.67      | 0.00      | -0.18     | 0.00    | 0.0     |         |         |                |                |                |                |            |            |            |            |            |            |            |            |            |            |            |            |





| Source | Sequence Id | Sequence Name | Gene Symbol | Ratio | Ratio | Ratio | Ratio | Log Ratio | Log Ratio | Log Ratio | Log Ratio | p-value | p-value | p-value | p-value | AdEM Total |  |
|--------|-------------|---------------|-------------|-------|-------|-------|-------|-----------|-----------|-----------|-----------|---------|---------|---------|---------|------------|------------|------------|------------|------------|------------|------------|------------|------------|------------|------------|------------|------------|------------|------------|------------|------------|------------|------------|------------|------------|------------|------------|------------|------------|------------|------------|------------|------------|------------|------------|------------|------------|------------|------------|------------|------------|------------|------------|------------|------------|------------|------------|------------|------------|------------|------------|------------|------------|------------|------------|------------|------------|------------|------------|------------|------------|------------|------------|------------|------------|------------|------------|------------|------------|------------|------------|------------|------------|------------|------------|------------|------------|------------|------------|------------|------------|------------|------------|------------|------------|------------|------------|------------|------------|------------|------------|------------|------------|------------|------------|------------|------------|------------|------------|------------|------------|------------|------------|------------|------------|------------|------------|------------|------------|------------|------------|------------|------------|------------|------------|------------|------------|------------|------------|------------|------------|------------|------------|------------|------------|------------|------------|------------|------------|------------|------------|------------|------------|------------|------------|------------|------------|------------|------------|------------|------------|------------|------------|------------|------------|------------|------------|------------|------------|------------|------------|------------|------------|------------|------------|------------|------------|------------|------------|------------|------------|------------|------------|------------|------------|------------|------------|------------|------------|------------|------------|------------|------------|------------|------------|------------|------------|------------|------------|------------|------------|------------|------------|------------|------------|------------|------------|------------|------------|------------|------------|------------|------------|------------|------------|------------|------------|------------|------------|------------|------------|------------|------------|------------|------------|------------|------------|------------|------------|------------|------------|------------|------------|------------|------------|------------|------------|------------|------------|------------|------------|------------|------------|------------|------------|------------|------------|------------|------------|------------|------------|------------|------------|------------|------------|------------|------------|------------|------------|------------|------------|------------|------------|------------|------------|------------|------------|------------|------------|------------|------------|------------|------------|------------|------------|------------|------------|------------|------------|------------|------------|------------|------------|------------|------------|------------|------------|------------|------------|------------|------------|------------|------------|------------|------------|------------|------------|------------|------------|------------|------------|------------|------------|------------|------------|------------|------------|------------|------------|------------|------------|------------|------------|------------|------------|------------|------------|------------|------------|------------|------------|------------|------------|------------|------------|------------|------------|------------|------------|------------|------------|------------|------------|------------|------------|------------|------------|------------|------------|------------|------------|------------|------------|------------|------------|------------|------------|------------|------------|------------|------------|------------|------------|------------|------------|------------|------------|------------|------------|------------|------------|------------|------------|------------|------------|------------|------------|------------|------------|------------|------------|------------|------------|------------|------------|------------|------------|------------|------------|------------|------------|------------|------------|------------|------------|------------|------------|------------|------------|------------|------------|------------|------------|------------|------------|------------|------------|------------|------------|------------|------------|------------|------------|------------|------------|------------|------------|------------|------------|------------|------------|------------|------------|------------|------------|------------|------------|------------|------------|------------|------------|------------|------------|------------|------------|------------|------------|------------|------------|------------|------------|------------|------------|------------|------------|------------|------------|------------|------------|------------|------------|------------|------------|------------|------------|------------|------------|------------|------------|------------|------------|------------|------------|------------|------------|------------|------------|------------|------------|------------|------------|------------|------------|------------|------------|------------|------------|------------|------------|------------|------------|------------|------------|------------|------------|------------|------------|------------|------------|------------|------------|------------|------------|------------|------------|------------|------------|------------|------------|------------|------------|------------|------------|------------|------------|------------|------------|------------|------------|------------|------------|------------|------------|------------|------------|------------|------------|------------|------------|------------|------------|------------|------------|------------|------------|------------|------------|------------|------------|------------|------------|------------|------------|------------|------------|------------|------------|------------|------------|------------|------------|------------|------------|------------|------------|------------|------------|------------|------------|------------|------------|------------|------------|------------|------------|------------|------------|------------|------------|------------|------------|------------|------------|------------|------------|------------|------------|------------|------------|------------|------------|------------|------------|------------|------------|------------|------------|------------|------------|------------|------------|------------|------------|------------|------------|------------|------------|------------|------------|------------|------------|------------|------------|------------|------------|------------|------------|------------|------------|------------|------------|------------|------------|------------|------------|------------|------------|------------|------------|------------|------------|------------|------------|------------|------------|------------|------------|------------|------------|------------|------------|------------|------------|------------|------------|------------|------------|------------|------------|------------|------------|------------|------------|------------|------------|------------|------------|------------|------------|------------|------------|------------|------------|------------|------------|------------|------------|------------|------------|------------|------------|------------|------------|------------|------------|------------|------------|------------|------------|------------|------------|------------|------------|------------|------------|------------|------------|--|
|--------|-------------|---------------|-------------|-------|-------|-------|-------|-----------|-----------|-----------|-----------|---------|---------|---------|---------|------------|------------|------------|------------|------------|------------|------------|------------|------------|------------|------------|------------|------------|------------|------------|------------|------------|------------|------------|------------|------------|------------|------------|------------|------------|------------|------------|------------|------------|------------|------------|------------|------------|------------|------------|------------|------------|------------|------------|------------|------------|------------|------------|------------|------------|------------|------------|------------|------------|------------|------------|------------|------------|------------|------------|------------|------------|------------|------------|------------|------------|------------|------------|------------|------------|------------|------------|------------|------------|------------|------------|------------|------------|------------|------------|------------|------------|------------|------------|------------|------------|------------|------------|------------|------------|------------|------------|------------|------------|------------|------------|------------|------------|------------|------------|------------|------------|------------|------------|------------|------------|------------|------------|------------|------------|------------|------------|------------|------------|------------|------------|------------|------------|------------|------------|------------|------------|------------|------------|------------|------------|------------|------------|------------|------------|------------|------------|------------|------------|------------|------------|------------|------------|------------|------------|------------|------------|------------|------------|------------|------------|------------|------------|------------|------------|------------|------------|------------|------------|------------|------------|------------|------------|------------|------------|------------|------------|------------|------------|------------|------------|------------|------------|------------|------------|------------|------------|------------|------------|------------|------------|------------|------------|------------|------------|------------|------------|------------|------------|------------|------------|------------|------------|------------|------------|------------|------------|------------|------------|------------|------------|------------|------------|------------|------------|------------|------------|------------|------------|------------|------------|------------|------------|------------|------------|------------|------------|------------|------------|------------|------------|------------|------------|------------|------------|------------|------------|------------|------------|------------|------------|------------|------------|------------|------------|------------|------------|------------|------------|------------|------------|------------|------------|------------|------------|------------|------------|------------|------------|------------|------------|------------|------------|------------|------------|------------|------------|------------|------------|------------|------------|------------|------------|------------|------------|------------|------------|------------|------------|------------|------------|------------|------------|------------|------------|------------|------------|------------|------------|------------|------------|------------|------------|------------|------------|------------|------------|------------|------------|------------|------------|------------|------------|------------|------------|------------|------------|------------|------------|------------|------------|------------|------------|------------|------------|------------|------------|------------|------------|------------|------------|------------|------------|------------|------------|------------|------------|------------|------------|------------|------------|------------|------------|------------|------------|------------|------------|------------|------------|------------|------------|------------|------------|------------|------------|------------|------------|------------|------------|------------|------------|------------|------------|------------|------------|------------|------------|------------|------------|------------|------------|------------|------------|------------|------------|------------|------------|------------|------------|------------|------------|------------|------------|------------|------------|------------|------------|------------|------------|------------|------------|------------|------------|------------|------------|------------|------------|------------|------------|------------|------------|------------|------------|------------|------------|------------|------------|------------|------------|------------|------------|------------|------------|------------|------------|------------|------------|------------|------------|------------|------------|------------|------------|------------|------------|------------|------------|------------|------------|------------|------------|------------|------------|------------|------------|------------|------------|------------|------------|------------|------------|------------|------------|------------|------------|------------|------------|------------|------------|------------|------------|------------|------------|------------|------------|------------|------------|------------|------------|------------|------------|------------|------------|------------|------------|------------|------------|------------|------------|------------|------------|------------|------------|------------|------------|------------|------------|------------|------------|------------|------------|------------|------------|------------|------------|------------|------------|------------|------------|------------|------------|------------|------------|------------|------------|------------|------------|------------|------------|------------|------------|------------|------------|------------|------------|------------|------------|------------|------------|------------|------------|------------|------------|------------|------------|------------|------------|------------|------------|------------|------------|------------|------------|------------|------------|------------|------------|------------|------------|------------|------------|------------|------------|------------|------------|------------|------------|------------|------------|------------|------------|------------|------------|------------|------------|------------|------------|------------|------------|------------|------------|------------|------------|------------|------------|------------|------------|------------|------------|------------|------------|------------|------------|------------|------------|------------|------------|------------|------------|------------|------------|------------|------------|------------|------------|------------|------------|------------|------------|------------|------------|------------|------------|------------|------------|------------|------------|------------|------------|------------|------------|------------|------------|------------|------------|------------|------------|------------|------------|------------|------------|------------|------------|------------|------------|------------|------------|------------|------------|------------|------------|------------|------------|------------|------------|------------|------------|------------|------------|------------|------------|------------|------------|------------|------------|------------|------------|------------|------------|------------|------------|------------|------------|------------|------------|------------|------------|------------|------------|------------|------------|------------|------------|------------|------------|------------|------------|------------|------------|------------|------------|------------|------------|------------|------------|------------|------------|------------|------------|------------|------------|------------|------------|--|

| Source      | Sequence ID | Sequence Name | Gene Symbol          | Ratio<br>AEM1/AEMT | Ratio<br>AEM1/AWT | Ratio<br>AEM1/AEM | Ratio<br>AEM1/AWT | Log Ratio<br>AEM1/AEMT | Log Ratio<br>AEM1/AWT | Log Ratio<br>AEM1/AEM | Log Ratio<br>AEM1/AWT | p-value<br>AEM1/AEMT | p-value<br>AEM1/AWT | p-value<br>AEM1/AEM | p-value<br>AEM1/AWT | AEM1 Total<br>Spectral Count | AEM1 Agt<br>Spectral Count | AEM1 TWT<br>Spectral Count | AEM1 AWT<br>Spectral Count | AEM1rep1<br>Normalized SC | AEM1rep2<br>Normalized SC | AEM1rep3<br>Normalized SC | AEM1rep1<br>Normalized SC | AEM1rep2<br>Normalized SC | AEM1rep3<br>Normalized SC | AEM1rep1<br>Normalized SC | AEM1rep2<br>Normalized SC | AEM1rep3<br>Normalized SC | AEM1rep1<br>Normalized SC | AEM1rep2<br>Normalized SC | AEM1rep3<br>Normalized SC |
|-------------|-------------|---------------|----------------------|--------------------|-------------------|-------------------|-------------------|------------------------|-----------------------|-----------------------|-----------------------|----------------------|---------------------|---------------------|---------------------|------------------------------|----------------------------|----------------------------|----------------------------|---------------------------|---------------------------|---------------------------|---------------------------|---------------------------|---------------------------|---------------------------|---------------------------|---------------------------|---------------------------|---------------------------|---------------------------|
| TOP PROTEIN | 010247921   | CD279_MOUSE   | Retinol-4 oxidase    | 1.00               | 0.80              | 1.33              | 1.67              | 0.00                   | -0.10                 | 0.12                  | 0.22                  | 1.000                | 0.802               | 0.768               | 0.561               | 3                            | 4                          | 3                          | 5                          | 1                         | 2                         | 0                         | 3                         | 0                         | 1                         | 2                         | 0                         | 2                         | 3                         | 3                         |                           |
| TOP PROTEIN | 010248041   | HEM4_MOUSE    | Retinol-4 oxidase    | 1.00               | 1.31              | 0.80              | 1.02              | 0.00                   | -0.10                 | 0.12                  | 0.22                  | 1.000                | 0.802               | 0.768               | 0.561               | 3                            | 4                          | 3                          | 5                          | 1                         | 2                         | 0                         | 3                         | 0                         | 1                         | 2                         | 0                         | 2                         | 3                         | 3                         |                           |
| TOP PROTEIN | 01027081    | MGAT1_MOUSE   | Alpha-1 mannosyl-g   | 1.00               | 1.00              | 1.33              | 0.50              | 0.18                   | 0.60                  | 0.12                  | -0.30                 | 0.725                | 0.101               | 0.643               | 0.678               | 3                            | 4                          | 2                          | 1                          | 2                         | 0                         | 1                         | 2                         | 0                         | 1                         | 1                         | 0                         | 1                         | 0                         | 0                         |                           |
| TOP PROTEIN | 01026791    | HOMD1_MOUSE   | Nucleoside 3'-mod    | 1.86               | 1.00              | 1.21              | 1.05              | -0.06                  | 0.00                  | 0.08                  | 0.02                  | 0.639                | 1.000               | 0.566               | 0.778               | 19                           | 23                         | 22                         | 23                         | 3                         | 7                         | 9                         | 6                         | 9                         | 6                         | 9                         | 7                         | 7                         | 9                         | 9                         |                           |
| TOP PROTEIN | 01048817    | CAV1_MOUSE    | Caveolin-1           | 1.00               | 1.15              | 0.80              | 1.02              | 0.00                   | -0.10                 | 0.12                  | 0.22                  | 1.000                | 0.802               | 0.768               | 0.561               | 3                            | 4                          | 3                          | 5                          | 1                         | 2                         | 0                         | 3                         | 0                         | 1                         | 2                         | 0                         | 2                         | 3                         | 3                         |                           |
| TOP PROTEIN | 01091121    | SGRD_MOUSE    | Sulfonolipase oxid   | 1.00               | 0.86              | 1.05              | 1.17              | -0.02                  | 0.07                  | 0.02                  | 0.07                  | 0.894                | 0.442               | 0.802               | 0.482               | 22                           | 23                         | 23                         | 27                         | 7                         | 8                         | 7                         | 6                         | 7                         | 10                        | 8                         | 10                        | 5                         | 8                         | 11                        |                           |
| TOP PROTEIN | 01028614    | PS2_MOUSE     | Deaf-1               | 1.96               | 1.31              | 0.77              | 1.16              | 0.19                   | 0.01                  | -0.11                 | 0.07                  | 0.131                | 0.502               | 0.567               | 0.502               | 1170                         | 830                        | 820                        | 872                        | 665                       | 326                       | 279                       | 375                       | 305                       | 218                       | 343                       | 322                       | 307                       | 318                       | 358                       |                           |
| TOP PROTEIN | 01013181    | TRPM_MOUSE    | Transient receptor   | 1.00               | 1.33              | 1.40              | 0.20              | 0.00                   | 0.13                  | 1.00                  | 0.22                  | 0.374                | 0.140               | 0.422               | 0.374               | 10                           | 14                         | 10                         | 15                         | 5                         | 6                         | 5                         | 6                         | 4                         | 5                         | 4                         | 5                         | 4                         | 5                         | 4                         |                           |
| TOP PROTEIN | 01058241    | ASPM_MOUSE    | Acid sphingomyelin   | 1.33               | 0.75              | 0.75              | 1.33              | -0.12                  | 0.12                  | -0.12                 | 0.12                  | 0.643                | 0.374               | 0.374               | 0.643               | 4                            | 3                          | 3                          | 4                          | 1                         | 2                         | 1                         | 1                         | 1                         | 1                         | 1                         | 1                         | 1                         | 1                         | 1                         |                           |
| TOP PROTEIN | 01062791    | PCNMD1_MOUSE  | PCNMD1               | 0.69               | 1.22              | 0.80              | 1.02              | 0.00                   | -0.10                 | 0.12                  | 0.22                  | 1.000                | 0.802               | 0.768               | 0.561               | 9                            | 11                         | 11                         | 13                         | 1                         | 2                         | 1                         | 1                         | 1                         | 1                         | 1                         | 1                         | 1                         | 1                         | 1                         |                           |
| TOP PROTEIN | 01020012    | VIOLAC_MOUSE  | Violaxanthin de-ep   | 1.89               | 1.49              | 1.22              | 0.73              | -0.14                  | 0.09                  | -0.14                 | -0.09                 | 0.737                | 0.349               | 0.302               | 0.362               | 93                           | 113                        | 104                        | 76                         | 15                        | 43                        | 35                        | 52                        | 30                        | 42                        | 23                        | 39                        | 17                        | 39                        | 20                        |                           |
| TOP PROTEIN | 01033179    | HMP1_MOUSE    | Multidrug resistance | 1.00               | 1.00              | 1.09              | 1.10              | 0.04                   | 0.04                  | 0.04                  | 0.04                  | 0.862                | 0.815               | 0.815               | 0.862               | 11                           | 12                         | 10                         | 11                         | 3                         | 3                         | 5                         | 6                         | 4                         | 2                         | 5                         | 5                         | 0                         | 5                         | 3                         |                           |
| TOP PROTEIN | 01026291    | MDK_MOUSE     | Secreted matrix pro  | 1.00               | 0.80              | 1.00              | 1.00              | 0.00                   | -0.10                 | 0.12                  | 0.22                  | 1.000                | 0.802               | 0.768               | 0.561               | 10                           | 12                         | 10                         | 11                         | 2                         | 3                         | 1                         | 1                         | 1                         | 1                         | 1                         | 1                         | 1                         | 1                         | 1                         |                           |
| TOP PROTEIN | 01026001    | IPG2_MOUSE    | 6-phosphogluconate   | 0.82               | 1.44              | 0.93              | 0.53              | -0.08                  | 0.16                  | -0.03                 | -0.28                 | 0.783                | 0.658               | 0.954               | 0.411               | 14                           | 13                         | 17                         | 9                          | 8                         | 5                         | 1                         | 0                         | 9                         | 4                         | 2                         | 4                         | 11                        | 1                         | 4                         |                           |
| TOP PROTEIN | 01038191    | CLU_MOUSE     | Clustering microchr  | 0.33               | 2.00              | 4.00              | 0.67              | -0.06                  | 0.30                  | 0.60                  | -0.18                 | 0.374                | 0.519               | 0.349               | 0.643</             |                              |                            |                            |                            |                           |                           |                           |                           |                           |                           |                           |                           |                           |                           |                           |                           |



| Source      | Sequence ID          | Sequence Name              | Gene Symbol | Ratio<br>AEM/AdNT | Ratio<br>AeM/AgWT | Ratio<br>AeM/AdM | Ratio<br>AgWT/AdM | Log Ratio<br>AEM/AdNT | Log Ratio<br>AeM/AgWT | Log Ratio<br>AeM/AdM | Log Ratio<br>AgWT/AdNT | p-value<br>AEM/AdNT | p-value<br>AeM/AgWT | p-value<br>AeM/AdM | p-value<br>AgWT/AdNT | AdEMTotal<br>Spectral Count | AgEMTotal<br>Spectral Count | AdWTTotal<br>Spectral Count | AgWTTotal<br>Spectral Count | AdEMrnp1<br>Normalized SC | AdEMrnp2<br>Normalized SC | AdEMrnp3<br>Normalized SC | AgEMrnp1<br>Normalized SC | AgEMrnp2<br>Normalized SC | AgEMrnp3<br>Normalized SC | AdWTrnp1<br>Normalized SC | AdWTrnp2<br>Normalized SC | AdWTrnp3<br>Normalized SC | AgWTrnp1<br>Normalized SC | AgWTrnp2<br>Normalized SC | AgWTrnp3<br>Normalized SC |
|-------------|----------------------|----------------------------|-------------|-------------------|-------------------|------------------|-------------------|-----------------------|-----------------------|----------------------|------------------------|---------------------|---------------------|--------------------|----------------------|-----------------------------|-----------------------------|-----------------------------|-----------------------------|---------------------------|---------------------------|---------------------------|---------------------------|---------------------------|---------------------------|---------------------------|---------------------------|---------------------------|---------------------------|---------------------------|---------------------------|
| TOP PROTEIN | 0108404 QIL1_MOUSE   | Protein QIL1               | Qil1        | 1.67              | 0.00              | 0.00             | 1.00              | 0.22                  | NA                    | NA                   | NA                     | 0.00                | 0.643               | 0.158              | 0.218                | 10.00                       | 0.00                        | 0.00                        | 3                           | 3                         | 0                         | 1                         | 0                         | 0                         | 0                         | 2                         | 1                         | 0                         | 0                         | 0                         | 0                         |
| TOP PROTEIN | 0108404 QIL1_MOUSE   | TP-dependent cdk1          | Cdk1        | 1.00              | 1.19              | 1.19             | 2.00              | 0.10                  | 0.18                  | 0.18                 | 0.12                   | 0.00                | 0.775               | 0.110              | 0.412                | 1.00                        | 1.19                        | 1.19                        | 2.00                        | 0.10                      | 0.18                      | 0.12                      | 0.00                      | 0.775                     | 0.110                     | 0.412                     | 1.00                      | 1.19                      | 1.19                      | 2.00                      |                           |
| TOP PROTEIN | 010910VUS ASMT_MOUSE | Araneus methantrypsin      | Asmt1       | 1.25              | 0.40              | 1.25             | 0.40              | 0.10                  | -0.40                 | -0.40                | 0.10                   | 0.519               | 0.349               | 0.251              | 0.678                | 5                           | 2                           | 4                           | 5                           | 2                         | 2                         | 1                         | 0                         | 0                         | 2                         | 2                         | 1                         | 1                         | 1                         | 1                         |                           |
| TOP PROTEIN | 0104602 DMRQ2_MOUSE  | Pericentriolar material    | Pcm1        | 0.75              | 0.50              | 0.67             | 1.00              | -0.12                 | 0.30                  | -0.18                | 0.00                   | 0.768               | 0.422               | 0.725              | 1.000                | 10.00                       | 1                           | 2                           | 4                           | 4                         | 0                         | 1                         | 2                         | 0                         | 2                         | 0                         | 1                         | 0                         | 0                         | 0                         |                           |
| TOP PROTEIN | 0104304 DMRQ2_MOUSE  | Threonine-dependent kinase | Thr1        | 0.12              | 0.14              | 1.19             | 0.12              | -0.12                 | -0.08                 | -0.18                | 0.12                   | 0.725               | 0.643               | 0.374              | 0.492                | 3                           | 5                           | 4                           | 6                           | 0                         | 1                         | 2                         | 2                         | 0                         | 2                         | 1                         | 1                         | 1                         | 1                         | 1                         |                           |
| TOP PROTEIN | 0108001 TMMA_MOUSE   | Thrombin-related trypsin   | Tmr1        | 0.75              | 0.83              | 1.67             | 1.50              | -0.15                 | 0.08                  | 0.22                 | 0.18                   | 0.725               | 0.643               | 0.374              | 0.492                | 3                           | 5                           | 4                           | 6                           | 0                         | 1                         | 2                         | 2                         | 0                         | 2                         | 1                         | 0                         | 2                         | 1                         | 2                         |                           |
| TOP PROTEIN | 0105011 CTNA3_MOUSE  | Catenin alpha 3            | Ctnn3       | 0.71              | 1.13              | 1.60             | 1.54              | -0.12                 | 0.05                  | 0.26                 | 0.06                   | 0.653               | 0.877               | 0.547              | 0.820                | 5                           | 9                           | 7                           | 8                           | 2                         | 2                         | 1                         | 7                         | 1                         | 1                         | 1                         | 1                         | 5                         | 3                         | 2                         |                           |
| TOP PROTEIN | 0101504 BLOC2_MOUSE  | BLOC1 complex              | Bloc1       | 0.86              | 0.14              | 1.19             | 0.87              | 0.07                  | -0.04                 | 0.11                 | 0.10                   | 0.850               | 0.212               | 0.850              | 0.212                | 24                          | 11                          | 29                          | 12                          | 8                         | 11                        | 6                         | 12                        | 5                         | 17                        | 18                        | 10                        | 4                         | 19                        | 8                         |                           |
| TOP PROTEIN | 0102171 TSP4_MOUSE   | Thrombospondin-4           | Tsp4        | 1.06              | 1.18              | 1.94             | 0.85              | 0.03                  | 0.07                  | -0.03                | 0.07                   | 0.705               | 0.740               | 0.892              | 0.422                | 69                          | 65                          | 65                          | 55                          | 24                        | 20                        | 25                        | 34                        | 27                        | 4                         | 21                        | 27                        | 17                        | 22                        | 14                        |                           |
| TOP PROTEIN | 0101731 CDE3_MOUSE   | CDE3 antigen               | Cde3        | 1.00              | 0.71              | 1.00             | 1.00              | 0.00                  | 0.15                  | 0.00                 | 0.15                   | 1.000               | 0.422               | 1.000              | 0.422                | 2                           | 5                           | 5                           | 7                           | 2                         | 1                         | 2                         | 2                         | 1                         | 1                         | 1                         | 2                         | 2                         | 1                         | 3                         |                           |
| TOP PROTEIN | 0102004 C2_MOUSE     | C2 complement              | C2          | 1.00              | 0.86              | 1.00             | 0.87              | 0.00                  | -0.09                 | -0.09                | 0.00                   | 0.777               | 0.786               | 0.777              | 0.786                | 7                           | 9                           | 7                           | 8                           | 0                         | 7                         | 9                         | 3                         | 1                         | 4                         | 7                         | 10                        | 10                        | 4                         | 7                         |                           |
| TOP PROTEIN | 0104204 C2_MOUSE     | C2 complement              | C2          | 1.05              | 1.15              | 1.15             | 1.05              | 0.02                  | 0.06                  | 0.06                 | 0.02                   | 0.946               | 0.774               | 0.798              | 0.943                | 41                          | 47                          | 39                          | 41                          | 1                         | 17                        | 23                        | 21                        | 16                        | 10                        | 26                        | 8                         | 5                         | 9                         | 25                        | 7                         |
| TOP PROTEIN | 0104638 H31B_MOUSE   | Rat regulated protein Rn   | Rn1         | 1.18              | 1.38              | 0.85             | 1.05              | 0.07                  | 0.14                  | -0.07                | -0.14                  | 0.755               | 0.417               | 0.693              | 0.577                | 26                          | 22                          | 22                          | 16                          | 10                        | 12                        | 4                         | 7                         | 4                         | 11                        | 1                         | 11                        | 10                        | 4                         | 7                         | 5                         |
| TOP PROTEIN | 0106433 H3_MOUSE     | Histone H3                 | Hist3a      | 1.12              | 0.87              | 0.87             | 1.00              | 0.00                  | -0.09                 | -0.09                | 0.00                   | 0.709               | 0.607               | 0.551              | 0.66                 | 29                          | 29                          | 26                          | 62                          | 9                         | 7                         | 9                         | 3                         | 1                         | 4                         | 7                         | 18                        | 10                        | 4                         | 8                         |                           |
| TOP PROTEIN | 0108644 ANSA_MOUSE   | Activator of 90 kDa h      | Aha1        | 1.00              | 1.50              | 0.80             | 1.43              | 0.25                  | 0.06                  | 0.70                 | 0.15                   | 0.860               | 0.854               | 0.073              | 0.588                | 0.145                       | 7                           | 10                          | 8                           | 0                         | 0                         | 5                         | 2                         | 5                         | 3                         | 1                         | 3                         | 4                         | 0                         | 2                         | 0                         |
| TOP PROTEIN | 0106847 RHOC_MOUSE   | Rho-related GTP-bind       | Rhoc        | 1.15              | 1.00              | 0.87             | 0.75              | 0.06                  | 0.11                  | -0.06                | -0.11                  | 0.768               | 0.539               | 0.725              | 0.624                | 15                          | 13                          | 13                          | 10                          | 3                         | 5                         | 7                         | 7                         | 3                         | 1                         | 3                         | 7                         | 2                         | 4                         | 4                         |                           |
| TOP PROTEIN | 0106847 RHOC_MOUSE   | Rho-related GTP-bind       | Rhoc        | 1.04              | 0.87              | 0.87             | 1.00              | 0.00                  | -0.09                 | -0.09                | 0.00                   | 0.811               | 0.602               | 0.539              | 0.624                | 10                          | 10                          | 10                          | 8                           | 0                         | 10                        | 10                        | 10                        | 10                        | 10                        | 10                        | 10                        | 10                        | 10                        | 10                        | 10                        |
| TOP PROTEIN | 0108171 NBL1_MOUSE   | Nblan-like protein 1       | Fam129b     | 1.57              | 3.25              | 1.18             | 0.87              | 0.20                  | 0.51                  | 0.07                 | -0.24                  | 0.499               | 0.284               | 0.813              | 0.251                | 11                          | 13                          | 7                           | 4                           | 1                         | 7                         | 3                         | 2                         | 2                         | 9                         | 2                         | 2                         | 2                         | 2                         | 2                         |                           |
| TOP PROTEIN | 0105679 HMF_MOUSE    | 6.8 kDa mitochondrial      | Mpf68       | 1.00              | 1.00              | 0.89             | 0.89              | 0.00                  | -0.05                 | -0.05                | 0.00                   | 1.000               | 1.000               | 0.643              | 0.374                | 8                           | 9                           | 8                           | 9                           | 2                         | 4                         | 3                         | 3                         | 2                         | 3                         | 3                         | 3                         | 3                         | 3                         | 3                         |                           |
| TOP PROTEIN | 0101894 HMF_MOUSE    | 6.8 kDa mitochondrial      | Mpf68       | 1.30              | 1.00              | 0.89             | 0.89              | 0.00                  | -0.05                 | -0.05                | 0.00                   | 1.000               | 1.000               | 0.643              | 0.374                | 8                           | 9                           | 8                           | 9                           | 2                         | 4                         | 3                         | 3                         | 2                         | 3                         | 3                         | 3                         | 3                         | 3                         | 3                         |                           |
| TOP PROTEIN | 0109147 DHAV2_MOUSE  | Isooctate dehydrogen       | Ish3b       | 1.16              | 1.02              | 0.81             | 0.91              | 0.01                  | 0.06                  | -0.01                | -0.09                  | 0.404               | 0.815               | 0.307              | 0.807                | 52                          | 42                          | 45                          | 41                          | 12                        | 20                        | 20                        | 16                        | 13                        | 13                        | 19                        | 5                         | 21                        | 14                        | 15                        |                           |
| TOP PROTEIN | 0103173 ENAF_MOUSE   | Enaf 3 of Protein e        | Enaf        | 1.00              | 1.00              | 0.60             | 0.20              | 0.00                  | 0.48                  | -0.22                | -0.70                  | 1.000               | 0.329               | 0.682              | 0.230                | 10                          | 6                           | 10                          | 2                           | 1                         | 0                         | 9                         | 3                         | 0                         | 6                         | 4                         | 0                         | 0                         | 0                         | 2                         | 0                         |
| TOP PROTEIN | 0103173 ENAF_MOUSE   | Isoform 3 of Protein e     | Enaf        | 1.00              | 1.00              | 0.60             | 0.20              | 0.00                  | 0.48                  | -0.22                | -0.70                  | 1.000               | 0.329               | 0.682              | 0.230                | 10                          | 6                           | 10                          | 2                           | 1                         | 0                         | 9                         | 3                         | 0                         | 6                         | 4                         | 0                         | 0                         | 0                         | 2                         | 0                         |
| TOP PROTEIN | 0109041 HQK1_MOUSE   | Protein enabled homc       | Enah        | 1.00              | 1.00              | 0.60             | 0.20              | 0.00                  | 0.48                  | -0.22                | -0.70                  | 1.000               | 0.329               | 0.682              | 0.230                | 10                          | 6                           | 10                          | 2                           | 1                         | 0                         | 9                         | 3                         | 0                         | 6                         | 4                         | 0                         | 0                         | 0                         | 2                         | 0                         |
| TOP PROTEIN | 0103173 ENAF_MOUSE   | Isoform 3 of Protein e     | Enaf        | 1.00              | 1.00              | 0.60             | 0.20              | 0.00                  | 0.48                  | -0.22                | -0.70                  | 1.000               | 0.329               | 0.682              | 0.230                | 10                          | 6                           | 10                          | 2                           | 1                         | 0                         | 9                         | 3                         | 0                         | 6                         | 4                         | 0                         | 0                         | 0                         | 2                         | 0                         |
| TOP PROTEIN | 0106070 HPL4_MOUSE   | Nuclear protein local      | Npl4a       | 0.50              | 0.40              | 0.50             | 0.40              | 0.00                  | -0.09                 | -0.09                | 0.00                   | 0.678               | 0.349               | 0.480              | 0.710                | 1                           | 4                           | 4                           | 0                           | 0                         | 1                         | 0                         | 0                         | 0                         | 0                         | 0                         | 0                         | 0                         | 0                         | 0                         | 0                         |
| TOP PROTEIN | 0107804 APOJ_MOUSE   | Apolipoprotein J-like      | ApoJ        | 1.00              | 1.44              | 1.28             | 0.89              | 0.00                  | 0.16                  | 0.11                 | -0.05                  | 1.000               | 0.424               | 0.604              | 0.783                | 18                          | 23                          | 18                          | 16                          | 2                         | 8                         | 5                         | 6                         | 12                        | 6                         | 3                         | 9                         | 3                         | 8                         | 5                         | 5                         |
| TOP PROTEIN | 0103946 SPR3_MOUSE   | Protein Rscat              | Rscat       | 4.00              | 2.00              | 0.50             | 1.00              | 0.40                  | 0.30                  | -0.30                | 0.00                   | 0.349               | 0.678               | 0.579              | 1.000                | 4                           | 2                           | 2                           | 1                           | 1                         | 0                         | 1                         | 0                         | 0                         | 0                         | 0                         | 0                         | 0                         | 0                         | 0                         | 0                         |
| TOP PROTEIN | 0102061 CROK3_MOUSE  | Crokinase 3                | Ser1        | 1.00              | 1.11              | 1.11             | 1.00              | 0.00                  | 0.15                  | 0.00                 | 0.15                   | 0.795               | 0.100               | 0.379              | 0.100                | 9                           | 10                          | 9                           | 9                           | 0                         | 1                         | 0                         | 1                         | 0                         | 0                         | 0                         | 0                         | 0                         | 0                         | 0                         | 0                         |
| TOP PROTEIN | 0106128 SRD_MOUSE    | Translocase associat       | Ser4        | 0.90              | 1.25              | 1.11             | 0.80              | -0.05                 | 0.10                  | 0.05                 | 0.10                   | 0.795               | 0.579               | 0.830              | 0.422                | 9                           | 10                          | 10                          | 8                           | 1                         | 3                         | 5                         | 2                         | 5                         | 3                         | 4                         | 3                         | 3                         | 2                         | 4                         | 2                         |
| TOP PROTEIN | 0102651 TMNA3_MOUSE  | Transmembrane pro          | Tmem3       | 0.97              | 1.10              | 1.19             | 0.97              | -0.01                 | 0.07                  | 0.08                 | 0.07                   | 0.740               | 0.607               | 0.957              | 0.957                | 25                          | 28                          | 28                          | 28                          | 5                         | 12                        | 16                        | 11                        | 10                        | 17                        | 8                         | 16                        | 4                         | 21                        | 5                         | 5                         |
| TOP PROTEIN | 0108961 TRSL_MOUSE   | Threosyl-tRNA synth        | Terc1       | 1.00              | 1.69              | 1.00             | 1.00              | 0.00                  | 0.16                  | 0.11                 | 0.30                   | 0.411               | 0.340               | 0.539              | 0.340                | 13                          | 13                          | 13                          | 10                          | 2                         | 4                         | 2                         | 4                         | 2                         | 4                         | 2                         | 4                         | 2                         | 4                         | 2                         | 4                         |
| TOP PROTEIN | 0108961 TRSL_MOUSE   | Isoform 2 of Threosyl      | Terc1       | 1.00              | 1.69              | 1.00             | 1.00              | 0.00                  | 0.16                  | 0.11                 | 0.30                   | 0.411               | 0.340               | 0.539              | 0.340                | 13                          | 13                          | 13                          | 10                          | 2                         | 4                         | 2                         | 4                         | 2                         | 4                         | 2                         | 4                         | 2                         | 4                         | 2                         | 4                         |
| TOP PROTEIN | 0109041 HQK1_MOUSE   | Carthage oligomeric n      | Comp        | 0.69              | 0.89              | 0.50             | 1.44              | 0.77                  | -0.16                 | 0.11                 | 0.16                   | 0.442               | 0.539               | 0.442              | 0.539                | 9                           | 13                          | 13                          | 10                          | 2                         | 4                         | 3                         | 2                         | 4                         | 7                         | 2                         | 4                         | 7                         | 4                         | 3                         | 4                         |
| TOP PROTEIN | 0103946 SPR3_MOUSE   | Protein Rscat              | Rscat       | 0.99              | 0.89              | 0.50             | 1.44              | 0.77                  | -0.16                 | 0.11                 | 0.16                   | 0.442               | 0.539               | 0.442              | 0.539                | 9                           | 13                          | 13                          | 10                          | 2                         | 4                         | 3                         | 2                         | 4                         | 7                         | 2                         | 4                         | 7                         | 4                         | 3                         | 4                         |
| TOP PROTEIN | 0107131 HPL_MOUSE    | Hexamer-inducible          | Hpl1        | 0.94              | 1.00              | 1.00             | 0.89              | 0.00                  | 0.15                  | 0.00                 | 0.15                   | 0.795               | 0.100               | 0.379              | 0.100                | 115                         | 107                         | 104                         | 143                         | 46                        | 39                        | 34                        | 44                        | 69                        | 14                        | 24                        | 24                        | 64                        | 34                        | 44                        | 42                        |
| TOP PROTEIN | 0109227 ACAT_MOUSE   | Acetyl-coenzyme A          | Sc13a1      | 1.67              | 2.00              | 0.40             | 0.30              | -0.42                 | 0.30                  | -0.40                | -0.48                  | 0.492               | 0.678               | 0.349              | 0.374                | 5                           | 2                           | 3                           | 1                           | 1                         | 3                         | 1                         | 2                         | 0                         | 0                         | 1                         | 2                         | 0                         | 0                         | 1                         | 0                         |
| TOP PROTEIN | 0102399 L1_MOUSE     | Alpha-1 antitrypsin        | Syrpn1      | 1.13              | 1.00              | 0.87             | 1.00              | 0.00                  | -0.09                 | -0.09                | 0.00                   | 0.817               | 0.607               | 0.539              | 0.624                | 13                          | 14                          | 17                          | 10                          | 5                         | 6                         | 10                        | 5                         | 6                         | 10                        | 5                         | 6                         | 10                        | 5                         | 6                         | 10                        |
| TOP PROTEIN | 0103590 GP1A_MOUSE   | Platelet glycoprotein      | GP1ba       | 1.67              | 1.25              | 2.00             | 2.67              | 0.22                  | 0.10                  | 0.30                 | 0.43                   | 0.643               | 0.519               | 0.252              | 0.189                | 5                           | 2                           | 3                           | 8                           | 0                         | 3                         | 2                         | 2                         | 5                         | 3                         | 0                         | 0                         | 3                         | 2                         | 3                         | 3                         |
| TOP PROTEIN | 0106200 HOKI_MOUSE   | Nucleosome sensitive       | Yba1        | 0.88              | 1.17              | 1.00             | 0.75              | -0.03                 | 0.17                  | 0.00                 | -0.12                  | 0.678               | 0.768               | 1.000              | 0.374                | 7                           | 7                           | 8                           | 6                           | 3                         | 3                         | 1                         | 2                         | 4                         | 2                         | 3                         | 3                         | 2                         | 3                         | 1                         | 1                         |
| TOP PROTEIN | 0109041 HQK1_MOUSE   | Nucleosome sensitive       | Yba1        | 0.88              | 1.17              | 1.00             | 0.75              | -0.03                 | 0.17                  | 0.00                 | -0.12                  | 0.678               | 0.768               | 1.000              | 0.374                | 7                           | 7                           | 8                           | 6                           | 3                         | 3                         | 1                         | 2                         | 4                         | 2                         | 3                         | 3                         | 2                         | 3                         | 1                         | 1                         |
| TOP PROTEIN | 0109041 HQK1_MOUSE   | Nucleosome sensitive       | Yba1        | 0.88              | 1.17              | 1.00             | 0.75              | -0.03                 | 0.17                  | 0.00                 | -0.12                  | 0.678               | 0.768               | 1.000              | 0.374                | 7                           | 7                           | 8                           | 6                           | 3                         | 3                         | 1                         | 2                         | 4                         | 2                         | 3                         | 3                         | 2                         | 3                         | 1                         | 1                         |
| TOP PROTEIN | 0109041 HQK1_MOUSE   | Nucleosome sensitive       | Yba1        | 0.88              | 1.17              | 1.00             | 0.75              | -0.03                 | 0.17                  | 0.00                 | -0.12                  | 0.678               | 0.768               | 1.000              | 0.374                | 7                           | 7                           | 8                           | 6                           | 3                         | 3                         | 1                         | 2                         | 4                         | 2                         | 3                         | 3                         | 2                         | 3                         | 1                         | 1                         |
| TOP PROTEIN | 0109041 HQK1_MOUSE   | Nucleosome sensitive       | Yba1        | 0.88              | 1.17              | 1.00             | 0.75              | -0.03                 | 0.17                  | 0.00                 | -0.12                  | 0.678               | 0.768               | 1.000              | 0.374                | 7                           | 7                           | 8                           | 6                           | 3                         | 3                         | 1                         | 2                         | 4                         | 2                         | 3                         | 3                         | 2                         | 3                         | 1                         | 1                         |
| TOP PROTEIN | 0109041 HQK1_MOUSE   | Nucleosome sensitive       | Yba1        | 0.88              | 1.17              | 1.00             | 0.75              | -0.03                 | 0.17                  | 0.00                 | -0.12                  | 0.678               | 0.768               | 1.000              | 0.374                | 7                           | 7                           | 8                           | 6                           | 3                         | 3                         | 1                         | 2                         | 4                         | 2                         | 3                         | 3                         | 2                         | 3                         | 1                         | 1                         |
| TOP PROTEIN | 0109041 HQK1_MOUSE   | Nucleosome sensitive       | Yba1        | 0.88              | 1.17              | 1.00             | 0.75              | -0.03                 | 0.17                  | 0.00                 | -0.12                  | 0.678               | 0.768               | 1.000              | 0.374                | 7                           | 7                           | 8                           | 6                           | 3                         | 3                         | 1                         | 2                         | 4                         | 2                         | 3                         | 3                         | 2                         | 3                         | 1                         | 1                         |
| TOP PROTEIN | 0109041 HQK1_MOUSE   | Nucleosome sensitive       | Yba1        | 0.88              | 1.17              | 1.00             | 0.75              | -0.03                 |                       |                      |                        |                     |                     |                    |                      |                             |                             |                             |                             |                           |                           |                           |                           |                           |                           |                           |                           |                           |                           |                           |                           |

[illegible]

|--|--|--|--|--|--|--|--|--|--|--|--|--|--|--|--|--|--|--|--|--|--|--|--|--|--|--|--|--|--|--|--|--|--|--|--|--|--|--|--|--|--|--|--|--|--|--|--|--|--|--|--|--|--|--|--|--|--|--|--|--|--|--|--|--|--|--|--|--|--|--|--|--|--|--|--|--|--|--|--|--|--|--|--|--|--|--|--|--|--|--|--|--|--|--|--|--|--|--|--|--|--|--|--|--|--|--|--|--|--|--|--|--|--|--|--|--|--|--|--|--|--|--|--|--|--|--|--|--|--|--|--|--|--|--|--|--|--|--|--|--|--|--|--|--|--|--|--|--|--|--|--|--|--|--|--|--|--|--|--|--|--|--|--|--|--|--|--|--|--|--|--|--|--|--|--|--|--|--|--|--|--|--|--|--|--|--|--|--|--|--|--|--|--|--|--|--|--|--|--|--|--|--|--|--|--|--|--|--|--|--|--|--|--|--|--|--|--|--|--|--|--|--|--|--|--|--|--|--|--|--|--|--|--|--|--|--|--|--|--|--|--|--|--|--|--|--|--|--|--|--|--|--|--|--|--|--|--|--|--|--|--|--|--|--|--|--|--|--|--|--|--|--|--|--|--|--|--|--|--|--|--|--|--|--|--|--|--|--|--|--|--|--|--|--|--|--|--|--|--|--|--|--|--|--|--|--|--|--|--|--|--|--|--|--|--|--|--|--|--|--|--|--|--|--|--|--|--|--|--|--|--|--|--|--|--|--|--|--|--|--|--|--|--|--|--|--|--|--|--|--|--|--|--|--|--|--|--|--|--|--|--|--|--|--|--|--|--|--|--|--|--|--|--|--|--|--|--|--|--|--|--|--|--|--|--|--|--|--|--|--|--|--|--|--|--|--|--|--|--|--|--|--|--|--|--|--|--|--|--|--|--|--|--|--|--|--|--|--|--|--|--|--|--|--|--|--|--|--|--|--|--|--|--|--|--|--|--|--|--|--|--|--|--|--|--|--|--|--|--|--|--|--|--|--|--|--|--|--|--|--|--|--|--|--|--|--|--|--|--|--|--|--|--|--|--|--|--|--|--|--|--|--|--|--|--|--|--|--|--|--|--|--|--|--|--|--|--|--|--|--|--|--|--|--|--|--|--|--|--|--|--|--|--|--|--|--|--|--|--|--|--|--|--|--|--|--|--|--|--|--|--|--|--|--|--|--|--|--|--|--|--|--|--|--|--|--|--|--|--|--|--|--|--|--|--|--|--|--|--|--|--|--|--|--|--|--|--|--|--|--|--|--|--|--|--|--|--|--|--|--|--|--|--|--|--|--|--|--|--|--|--|--|--|--|--|--|--|--|--|--|--|--|--|--|--|--|--|--|--|--|--|--|--|--|--|--|--|--|--|--|--|--|--|--|--|--|--|--|--|--|--|--|--|--|--|--|--|--|--|--|--|--|--|--|--|--|--|--|--|--|--|--|--|--|--|--|--|--|--|--|--|--|--|--|--|--|--|--|--|--|--|--|--|--|--|--|--|--|--|--|--|--|--|--|--|--|--|--|--|--|--|--|--|--|--|--|--|--|--|--|--|--|--|--|--|--|--|--|--|--|--|--|--|--|--|--|--|--|--|--|--|--|--|--|--|--|--|--|--|--|--|--|--|--|--|--|--|--|--|--|--|--|--|--|--|--|--|--|--|--|--|--|--|--|--|--|--|--|--|--|--|--|--|--|--|--|--|--|--|--|--|--|--|--|--|--|--|--|--|--|--|--|--|--|--|--|--|--|--|--|--|--|--|--|--|--|--|--|--|--|--|--|--|--|--|--|--|--|--|--|--|--|--|--|--|--|--|--|--|--|--|--|--|--|--|--|--|--|--|--|--|--|--|--|--|--|--|--|--|--|--|--|--|--|--|--|--|--|--|--|--|--|--|--|--|--|--|--|--|--|--|--|--|--|--|--|--|--|--|--|--|--|--|--|--|--|--|--|--|--|--|--|--|--|--|--|--|--|--|--|--|--|--|--|--|--|--|--|--|--|--|--|--|--|--|--|--|--|--|--|--|--|--|--|--|--|--|--|--|--|--|--|--|--|--|--|--|--|--|--|--|--|--|--|--|--|--|--|--|--|--|--|--|--|--|--|--|--|--|--|--|--|--|--|--|--|--|--|--|--|--|--|--|--|--|--|--|--|--|--|--|--|--|--|--|--|--|--|--|--|--|--|--|--|--|--|--|--|--|--|--|--|--|--|--|--|--|--|--|--|--|--|--|--|--|--|--|--|--|--|--|--|--|--|--|--|--|--|--|--|--|--|--|--|--|--|--|--|--|--|--|--|--|--|--|--|--|--|--|--|--|--|--|--|--|--|--|--|--|--|--|--|--|--|--|--|--|--|--|--|--|--|--|--|--|--|--|--|--|--|--|--|--|--|--|--|--|--|--|--|--|--|--|--|--|--|--|--|--|--|--|--|--|--|--|--|--|--|--|--|--|--|--|--|--|--|--|--|--|--|--|--|--|--|--|--|--|--|--|--|--|--|--|--|--|--|--|--|--|--|--|--|--|--|--|--|--|--|--|--|--|--|--|--|--|--|--|--|--|--|--|--|--|--|--|--|--|--|--|--|--|--|--|--|--|--|--|--|--|--|--|--|--|--|--|--|--|--|--|--|--|--|--|--|--|--|--|--|--|--|--|--|--|--|--|--|--|--|--|--|--|--|--|--|--|--|--|--|--|--|--|--|--|--|--|--|--|--|--|--|--|--|--|--|--|--|--|--|--|--|--|--|--|--|--|--|--|--|--|--|--|--|--|--|--|--|--|--|--|--|--|--|--|--|--|--|--|--|--|--|--|--|--|--|--|--|--|--|--|--|--|--|--|--|--|--|--|--|--|--|--|--|--|--|--|--|--|--|--|--|--|--|--|--|--|--|--|--|--|--|--|--|--|--|--|--|--|--|--|--|--|--|--|--|--|--|--|--|--|--|--|--|--|--|--|--|--|--|--|--|--|--|--|--|--|--|--|--|--|--|--|--|--|--|--|--|--|--|--|--|--|--|--|--|--|--|--|--|--|--|--|--|--|--|--|--|--|--|--|--|--|--|--|--|--|--|--|--|--|--|--|--|--|--|--|--|--|--|--|--|--|--|--|--|--|--|--|--|--|--|--|--|--|--|--|

|             | Source | Sequence ID            | Sequence Name            | Gene Symbol | Ratio | AdEM/AdWT | Ratio | AgEM/AgWT | Ratio | AdEM/AdEM | AgWT/AgWT | Log Ratio | AdEM/AdWT | Log Ratio | AgEM/AgWT | Log Ratio | p-value | AdEM/AdWT | p-value | AgEM/AgWT | p-value | AdEM/AdEM | AgWT/AgWT | AdEM/AdWT      | AgEM/AdWT      | AdWT Total     | AgWT Total     | AdEM/AdWT     | AgEM/AdWT     | AdEM/AdWT     | AgEM/AdWT     | AdEM/AdWT     | AgEM/AdWT     | AdEM/AdWT     | AgEM/AdWT     |               |               |
|-------------|--------|------------------------|--------------------------|-------------|-------|-----------|-------|-----------|-------|-----------|-----------|-----------|-----------|-----------|-----------|-----------|---------|-----------|---------|-----------|---------|-----------|-----------|----------------|----------------|----------------|----------------|---------------|---------------|---------------|---------------|---------------|---------------|---------------|---------------|---------------|---------------|
|             |        |                        |                          |             |       |           |       |           |       |           |           |           |           |           |           |           |         |           |         |           |         |           |           | Spectral Count | Spectral Count | Spectral Count | Spectral Count | Normalized SC |
| TOP PROTEIN |        | sp Q2D863 ARF6_MOUSE   | ADP-ribosylation factor  | Arf6p3      | NA    | 2.00      | 1.00  | NA        | NA    | NA        | NA        | 0.30      | 0.00      | NA        | 0.116     | 0.678     | 1.000   | 0.374     | NA      | 0.374     | NA      | 0.374     | NA        | 2              | 2              | 0              | 1              | 0             | 1             | 1             | 0             | 2             | 0             | 0             | 1             | 0             |               |
| TOP PROTEIN |        | sp Q2D819 ARF1_MOUSE   | Arf1-isoform alpha-mem   | Arf1p3      | NA    | 0.50      | 1.00  | NA        | NA    | NA        | NA        | 0.30      | 0.00      | NA        | 0.174     | 0.478     | 1.000   | 0.374     | NA      | 0.374     | NA      | 0.374     | NA        | 1              | 0              | 0              | 0              | 0             | 0             | 0             | 0             | 0             | 0             | 0             | 0             | 0             |               |
| TOP PROTEIN |        | sp P70412 STX4_MOUSE   | Syntaxin-4               | Stx4        | NA    | 1.00      | 1.00  | NA        | NA    | NA        | NA        | 0.00      | 0.00      | NA        | 0.374     | 1.000     | 1.000   | 0.374     | NA      | 0.374     | NA      | 0.374     | NA        | 2              | 2              | 0              | 2              | 0             | 0             | 0             | 0             | 0             | 0             | 0             | 0             | 0             |               |
| TOP PROTEIN |        | sp P97310 PRF1_MOUSE   | Plakophilin-1            | Plg1p1      | NA    | 1.00      | 1.00  | NA        | NA    | NA        | NA        | 0.00      | 0.00      | NA        | 0.374     | 1.000     | 1.000   | 0.374     | NA      | 0.374     | NA      | 0.374     | NA        | 1              | 1              | 0              | 1              | 0             | 0             | 0             | 0             | 0             | 0             | 0             | 0             | 0             |               |
| TOP PROTEIN |        | sp P97310 PRF1_MOUSE   | Plakophilin-1            | Plg1p2      | NA    | 1.00      | 1.00  | NA        | NA    | NA        | NA        | 0.00      | 0.00      | NA        | 0.374     | 1.000     | 1.000   | 0.374     | NA      | 0.374     | NA      | 0.374     | NA        | 1              | 1              | 0              | 1              | 0             | 0             | 0             | 0             | 0             | 0             | 0             | 0             | 0             |               |
| TOP PROTEIN |        | sp Q6Z624 THSD5_MOUSE  | Thyroid hormone-induc    | Thsd5       | NA    | 1.00      | 1.00  | NA        | NA    | NA        | NA        | 0.00      | 0.00      | NA        | 0.374     | 1.000     | 1.000   | 0.374     | NA      | 0.374     | NA      | 0.374     | NA        | 1              | 1              | 0              | 1              | 0             | 0             | 0             | 0             | 0             | 0             | 0             | 0             | 0             |               |
| TOP PROTEIN |        | sp Q2U438 SH3L1_MOUSE  | SH3 domain-binding 1     | Sh3bp1      | NA    | 1.00      | 1.00  | NA        | NA    | NA        | NA        | 0.00      | 0.00      | NA        | 0.374     | 1.000     | 1.000   | 0.374     | NA      | 0.374     | NA      | 0.374     | NA        | 1              | 1              | 0              | 1              | 0             | 0             | 0             | 0             | 0             | 0             | 0             | 0             | 0             |               |
| TOP PROTEIN |        | sp Q2U741 GATC_MOUSE   | Alpha-methylglu-CoA      | Gatc        | NA    | 0.00      | NA    | NA        | NA    | NA        | NA        | NA        | NA        | NA        | NA        | NA        | 0.374   | NA        | 0.374   | NA        | 0.374   | NA        | 0.374     | 0              | 0              | 0              | 0              | 0             | 0             | 0             | 0             | 0             | 0             | 0             | 0             | 0             |               |
| TOP PROTEIN |        | tr J3K063 J3K063_MOUSE | Uncharacterized prots    | lgth-5      | NA    | 0.00      | NA    | NA        | NA    | NA        | NA        | NA        | NA        | NA        | NA        | NA        | NA      | 0.374     | NA      | 0.374     | NA      | 0.374     | NA        | 0              | 0              | 0              | 0              | 0             | 0             | 0             | 0             | 0             | 0             | 0             | 0             | 0             |               |
| TOP PROTEIN |        | sp Q2D829 HAH1_MOUSE   | isoamyl acetate-hydrol   | ihah1       | NA    | 0.00      | NA    | NA        | NA    | NA        | NA        | NA        | NA        | NA        | NA        | NA        | NA      | 0.374     | NA      | 0.374     | NA      | 0.374     | NA        | 0              | 0              | 0              | 0              | 0             | 0             | 0             | 0             | 0             | 0             | 0             | 0             | 0             |               |
| TOP PROTEIN |        | sp Q2D849 ITGB8_MOUSE  | integrin beta-8          | Itgb8       | NA    | 0.00      | NA    | NA        | NA    | NA        | NA        | NA        | NA        | NA        | NA        | NA        | NA      | 0.374     | NA      | 0.374     | NA      | 0.374     | NA        | 0              | 0              | 0              | 0              | 0             | 0             | 0             | 0             | 0             | 0             | 0             | 0             | 0             |               |
| TOP PROTEIN |        | sp P56827 DYL1_MOUSE   | Dynein light chain Tcd   | Dynl3b      | 0.00  | NA        | NA    | NA        | 0.00  | NA        | 0.374   | NA        | 0.374   | NA        | 0.374   | NA        | 0.374     | 0              | 0              | 0              | 0              | 0             | 0             | 0             | 0             | 0             | 0             | 0             | 0             | 0             |               |
| TOP PROTEIN |        | sp Q8VCE9 SPOM1_MOUSE  | Spindlin-1               | Spn1        | 0.00  | NA        | NA    | NA        | 0.00  | NA        | 0.374   | NA        | 0.374   | NA        | 0.374   | NA        | 0.374     | 0              | 0              | 0              | 0              | 0             | 0             | 0             | 0             | 0             | 0             | 0             | 0             | 0             |               |
| TOP PROTEIN |        | sp Q35886 ITK1_MOUSE   | Serine/threonine-pro     | Itk1        | 0.00  | NA        | NA    | NA        | 0.00  | NA        | 0.374   | NA        | 0.374   | NA        | 0.374   | NA        | 0.374     | 0              | 0              | 0              | 0              | 0             | 0             | 0             | 0             | 0             | 0             | 0             | 0             | 0             |               |
| TOP PROTEIN |        | sp Q3K611 TAX1_MOUSE   | Tax-1-binding protein    | Tax1bp1     | 0.00  | NA        | NA    | NA        | 0.00  | NA        | 0.374   | NA        | 0.374   | NA        | 0.374   | NA        | 0.374     | 0              | 0              | 0              | 0              | 0             | 0             | 0             | 0             | 0             | 0             | 0             | 0             | 0             |               |
| TOP PROTEIN |        | sp P14901 HMGA2_MOUSE  | Hemoglobin A             | Hmga2       | 0.00  | NA        | NA    | NA        | 0.00  | NA        | 0.374   | NA        | 0.374   | NA        | 0.374   | NA        | 0.374     | 0              | 0              | 0              | 0              | 0             | 0             | 0             | 0             | 0             | 0             | 0             | 0             | 0             |               |
| TOP PROTEIN |        | sp Q2C612 EMC1_MOUSE   | Emc1                     | Emc1        | 1.50  | 1.00      | 0.33  | 0.50      | 0.18  | 0.00      | 0.00      | -0.48     | -0.30     | 0.374     | 1.000     | 0.116     | 0.519   | 1.000     | 0.374   | NA        | 0.374   | NA        | 0.374     | 1              | 1              | 2              | 1              | 1             | 1             | 1             | 1             | 1             | 1             | 1             | 1             | 1             |               |
| TOP PROTEIN |        | sp P62320 SMO1_MOUSE   | Small nuclear ribonuc    | Srn1        | 1.00  | 3.00      | 1.00  | 1.50      | 0.50  | 0.00      | 0.48      | 0.18      | -0.30     | 1.000     | 0.116     | 0.374     | 0.519   | 2.00      | 0.116   | 0.374     | 0.519   | 2.00      | 0.116     | 3              | 3              | 2              | 1              | 1             | 1             | 1             | 1             | 1             | 1             | 1             | 1             | 1             |               |
| TOP PROTEIN |        | sp P10639 THO1_MOUSE   | Thioredoxin              | Tho1        | 1.00  | 0.00      | 0.00  | 2.00      | 0.00  | NA        | 0.00      | NA        | 0.30      | 1.000     | 0.116     | 0.374     | 0.519   | 1.000     | 0.116   | 0.374     | 0.519   | 1.000     | 0.116     | 1              | 1              | 0              | 1              | 1             | 1             | 1             | 1             | 1             | 1             | 1             | 1             | 1             |               |
| TOP PROTEIN |        | tr F6ZCZ9 F6Z_MOUSE    | IGF2R glucocorticoid-ind | Ligf2r      | 1.00  | 0.00      | 0.50  | NA        | 2.00  | NA        | 0.00      | -0.30     | NA        | 0.374     | 0.519     | 0.374     | 0.519   | 0.374     | 0.519   | 0.374     | 0.519   | 0.374     | 0.519     | 0              | 1              | 1              | 2              | 0             | 0             | 0             | 0             | 0             | 0             | 0             | 0             |               |               |
| TOP PROTEIN |        | sp Q2U819 MYO1_MOUSE   | Myosin                   | Myo1        | 0.00  | 1.00      | NA    | 0.50      | NA    | 0.00      | NA        | 0.00      | NA        | 0.374     | 1.000     | 0.374     | 0.519   | 0.374     | 0.519   | 0.374     | 0.519   | 0.374     | 0.519     | 0              | 1              | 2              | 1              | 0             | 0             | 0             | 0             | 0             | 0             | 0             | 0             |               |               |
| TOP PROTEIN |        | sp Q31763 JAKO1_MOUSE  | NAD(P)+adenosine kin     | Jako1       | 0.00  | 1.00      | 0.50  | 2.00      | 0.00  | 0.30      | 0.00      | -0.30     | -0.30     | 0.519     | 0.519     | 0.519     | 0.519   | 0.519     | 0.519   | 0.519     | 0.519   | 0.519     | 0.519     | 2              | 1              | 0              | 2              | 1             | 1             | 1             | 1             | 1             | 1             | 1             | 1             | 1             |               |
| TOP PROTEIN |        | sp Q2U4V0 HCD1_MOUSE   | Cell differentiation pro | Hcd1        | 2.00  | 0.50      | 0.50  | 2.00      | 0.00  | 0.30      | 0.00      | -0.30     | -0.30     | 0.519     | 0.519     | 0.519     | 0.519   | 0.519     | 0.519   | 0.519     | 0.519   | 0.519     | 0.519     | 2              | 1              | 0              | 2              | 1             | 1             | 1             | 1             | 1             | 1             | 1             | 1             | 1             |               |
| TOP PROTEIN |        | sp Q2D889 CPH1_MOUSE   | Carbonic phosphatase     | Cph1        | 0.00  | 0.00      | 0.00  | 0.00      | 0.00  | 0.00      | 0.00      | 0.00      | -0.30     | 0.00      | 0.00      | 0.00      | 0.00    | 1.000     | 1.000   | 0.519     | 0.519   | 0.519     | 0.519     | 1              | 2              | 1              | 2              | 1             | 1             | 1             | 1             | 1             | 1             | 1             | 1             |               |               |
| TOP PROTEIN |        | sp Q3R1Q3 ANGU1_MOUSE  | Angiotensin-related 1    | Angu1       | 0.00  | 1.00      | 0.50  | 2.00      | 0.00  | 0.00      | 0.00      | 0.00      | 0.00      | 0.00      | 0.00      | 0.00      | 0.00    | 1.000     | 1.000   | 0.519     | 0.519   | 0.519     | 0.519     | 1              | 2              | 1              | 2              | 1             | 1             | 1             | 1             | 1             | 1             | 1             | 1             |               |               |
| TOP PROTEIN |        | tr B8A038 B8A_MOUSE    | PDC domain containin     | Pdc1        | 1.00  | 1.00      | 2.00  | 0.50      | 0.00  | 0.00      | 0.00      | -0.30     | -0.30     | 1.000     | 0.519     | 0.519     | 1.000   | 0.519     | 1.000   | 0.519     | 1.000   | 0.519     | 1.000     | 1              | 1              | 0              | 1              | 0             | 0             | 0             | 0             | 0             | 0             | 0             | 0             | 0             |               |
| TOP PROTEIN |        | sp Q3R1Q6 TTT4_MOUSE   | transmembrane prot       | Ttt4        | 0.00  | 1.00      | 2.00  | 0.50      | 0.00  | 0.00      | 0.00      | 0.00      | 0.00      | 0.00      | 0.00      | 0.00      | 0.00    | 1.000     | 1.000   | 0.519     | 0.519   | 0.519     | 0.519     | 1              | 2              | 1              | 2              | 1             | 1             | 1             | 1             | 1             | 1             | 1             | 1             |               |               |
| TOP PROTEIN |        | sp P50427 ST5_MOUSE    | Steryl sulfatase         | St5         | 1.00  | 2.00      | 1.00  | 2.00      | 0.00  | 0.00      | 0.00      | 0.00      | 0.00      | 0.00      | 0.00      | 0.00      | 0.00    | 1.000     | 1.000   | 0.519     | 0.519   | 0.519     | 0.519     | 1              | 2              | 1              | 2              | 1             | 1             | 1             | 1             | 1             | 1             | 1             | 1             |               |               |
| TOP PROTEIN |        | sp Q3U6V7 CATC_MOUSE   | Catalase-2               | Catc        | 1.00  | 0.50      | 1.00  | 0.50      | 0.00  | 0.00      | 0.00      | -0.30     | 0.00      | 1.000     | 0.519     | 1.000     | 0.519   | 1.000     | 0.519   | 1.000     | 0.519   | 1.000     | 0.519     | 1              | 2              | 1              | 2              | 1             | 1             | 1             | 1             | 1             | 1             | 1             | 1             |               |               |
| TOP PROTEIN |        | sp Q35821 H2AL_MOUSE   | Hyalemidase-2            | Hyal2       | 0.00  | 0.00      | 0.00  | 0.00      | 0.00  | 0.00      | 0.00      | 0.00      | 0.00      | 0.00      | 0.00      | 0.00      | 0.00    | 1.000     | 1.000   | 0.519     | 0.519   | 0.519     | 0.519     | 0              | 0              | 0              | 0              | 0             | 0             | 0             | 0             | 0             | 0             | 0             | 0             |               |               |
| TOP PROTEIN |        | sp Q2D864 GATM_MOUSE   | Glycine amidotransfer    | Gatm        | 1.00  | 0.50      | 1.00  | 0.50      | 0.00  | 0.00      | 0.00      | -0.30     | 0.00      | 1.000     | 0.519     | 1.000     | 0.519   | 1.000     | 0.519   | 1.000     | 0.519   | 1.000     | 0.519     | 1              | 2              | 2              | 2              | 1             | 1             | 1             | 1             | 1             | 1             | 1             | 1             | 1             |               |
| TOP PROTEIN |        | sp Q3D9F3 S2S5_MOUSE   | Solute carrier family 2  | Slc2s5      | 0.50  | 1.00      | 1.00  | 0.50      | 0.00  | 0.00      | 0.00      | -0.30     | 0.00      | 1.000     | 0.519     | 1.000     | 0.519   | 1.000     | 0.519   | 1.000     | 0.519   | 1.000     | 0.519     | 1              | 2              | 2              | 2              | 1             | 1             |               |               |               |               |               |               |               |               |

Figure\_6\_ECM\_Proteomics\_Summarized

| Source      | Sequence Id             | Sequence Name                                                         | Gene Symbol | AdEM                 | AgEM                 | AdWT                 | AgWT                 | Trend |
|-------------|-------------------------|-----------------------------------------------------------------------|-------------|----------------------|----------------------|----------------------|----------------------|-------|
|             |                         |                                                                       |             | Total Spectral Count | Total Spectral Count | Total Spectral Count | Total Spectral Count |       |
| TOP PROTEIN | sp Q99K41 EMIL1_MOUSE   | EMILIN-1                                                              | Emilin1     | 0                    | 0                    | 152                  | 100                  |       |
| TOP PROTEIN | sp Q66K08 CUP1_MOUSE    | Cartilage intermediate layer protein 1                                | Clp1        | 3                    | 4                    | 54                   | 42                   |       |
| TOP PROTEIN | sp Q021W4 GGF11_MOUSE   | Growth/differentiation factor 11                                      | Gdf11       | 30                   | 37                   | 77                   | 57                   |       |
| TOP PROTEIN | sp Q08879-2 FBLN1_MOUSE | Isoform C of Fibulin-1                                                | Fbln1       | 13                   | 9                    | 11                   | 35                   |       |
| TOP PROTEIN | sp Q9WVH9 FBLN5_MOUSE   | Fibulin-5                                                             | Fbln5       | 212                  | 85                   | 133                  | 219                  |       |
| TOP PROTEIN | sp P55002 MFAP2_MOUSE   | Microfibrillar-associated protein 2                                   | Mfap2       | 23                   | 12                   | 13                   | 15                   |       |
| TOP PROTEIN | sp Q61810-2 LTBP3_MOUSE | Isoform 2 of Latent-transforming growth factor beta-binding protein 3 | Ltbp3       | 12                   | 4                    | 6                    | 4                    |       |
| TOP PROTEIN | sp Q35468 WNT9B_MOUSE   | Protein Wnt-9b                                                        | Wnt9b       | 12                   | 20                   | 12                   | 4                    |       |
| TOP PROTEIN | sp AGH584 CO6A5_MOUSE   | Collagen alpha-5(V) chain                                             | Col6a5      | 42                   | 74                   | 41                   | 28                   |       |
| TOP PROTEIN | sp Q9Q250 CO4A3_MOUSE   | Collagen alpha-3(V) chain                                             | Col4a3      | 6                    | 13                   | 7                    | 9                    |       |
| TOP PROTEIN | sp Q9R045 ANGL2_MOUSE   | Angiotensin-related protein 2                                         | Angptl2     | 12                   | 16                   | 2                    | 10                   |       |
| TOP PROTEIN | sp P29788 VTNC_MOUSE    | Vitronectin                                                           | Vtn         | 58                   | 56                   | 38                   | 85                   |       |
| TOP PROTEIN | sp P21956-2 MFGM_MOUSE  | Isoform 2 of Lactadherin                                              | Mfge8       | 344                  | 282                  | 220                  | 413                  |       |
| TOP PROTEIN | v Q3Z7H8 Q3Z7H8_MOUSE   | Protein Clp2                                                          | Clp2        | 48                   | 51                   | 34                   | 21                   |       |
| TOP PROTEIN | sp QBC1E6 COPA_MOUSE    | Coatomer subunit alpha                                                | Copa        | 69                   | 60                   | 69                   | 33                   |       |

| Log Ratio | Log Ratio | Log Ratio | Log Ratio |
|-----------|-----------|-----------|-----------|
| AdEM/AdWT | AgEM/AgWT | AgEM/AdEM | AgWT/AdWT |
| NA        | NA        | NA        | -0.18     |
| -1.26     | -1.02     | 0.12      | -0.11     |
| -0.41     | -0.19     | 0.09      | -0.13     |
| 0.07      | -0.59     | -0.16     | 0.50      |
| 0.20      | -0.41     | -0.40     | 0.22      |
| 0.25      | -0.10     | -0.28     | 0.06      |
| 0.30      | 0.00      | -0.48     | -0.18     |
| 0.00      | 0.70      | 0.22      | -0.48     |
| 0.01      | 0.42      | 0.25      | -0.17     |
| -0.07     | 0.16      | 0.34      | 0.11      |
| 0.78      | 0.20      | 0.12      | 0.70      |
| 0.18      | -0.18     | -0.02     | 0.35      |
| 0.19      | -0.17     | -0.09     | 0.27      |
| 0.15      | 0.39      | 0.03      | -0.21     |
| 0.00      | 0.26      | -0.06     | -0.32     |

| p-value   | p-value   | p-value   | p-value   |
|-----------|-----------|-----------|-----------|
| AdEM/AdWT | AgEM/AgWT | AgEM/AdEM | AgWT/AdWT |
| 0.006     | 0.000     | NA        | 0.151     |
| 0.003     | 0.000     | 0.663     | 0.238     |
| 0.044     | 0.362     | 0.550     | 0.432     |
| 0.678     | 0.011     | 0.442     | 0.013     |
| 0.507     | 0.027     | 0.260     | 0.244     |
| 0.089     | 0.519     | 0.038     | 0.710     |
| 0.158     | 1.000     | 0.039     | 0.561     |
| 1.000     | 0.035     | 0.402     | 0.016     |
| 0.851     | 0.004     | 0.019     | 0.034     |
| 0.725     | 0.116     | 0.082     | 0.561     |
| 0.132     | 0.279     | 0.575     | 0.047     |
| 0.152     | 0.020     | 0.868     | 0.004     |
| 0.230     | 0.185     | 0.587     | 0.029     |
| 0.155     | 0.150     | 0.877     | 0.041     |
| 1.000     | 0.011     | 0.511     | 0.004     |

| AdEM:rep1 Normalized | AdEM:rep2 Normalized | AdEM:rep3 Normalized | AgEM:rep1 Normalized | AgEM:rep2 Normalized | AgEM:rep3 Normalized | AdWT:rep1 Normalized | AdWT:rep2 Normalized | AdWT:rep3 Normalized | AgWT:rep1 Normalized | AgWT:rep2 Normalized | AgWT:rep3 Normalized |
|----------------------|----------------------|----------------------|----------------------|----------------------|----------------------|----------------------|----------------------|----------------------|----------------------|----------------------|----------------------|
| SC                   |
| 0                    | 0                    | 0                    | 0                    | 0                    | 0                    | 49                   | 68                   | 35                   | 33                   | 17                   | 30                   |
| 0                    | 2                    | 1                    | 1                    | 2                    | 1                    | 17                   | 23                   | 14                   | 16                   | 12                   | 14                   |
| 9                    | 6                    | 15                   | 17                   | 11                   | 9                    | 22                   | 20                   | 35                   | 31                   | 14                   | 12                   |
| 4                    | 4                    | 5                    | 2                    | 6                    | 1                    | 4                    | 6                    | 1                    | 14                   | 11                   | 10                   |
| 131                  | 29                   | 52                   | 27                   | 45                   | 13                   | 81                   | 34                   | 18                   | 91                   | 61                   | 67                   |
| 9                    | 7                    | 7                    | 6                    | 3                    | 3                    | 3                    | 7                    | 3                    | 3                    | 6                    | 6                    |
| 4                    | 3                    | 5                    | 2                    | 2                    | 0                    | 3                    | 3                    | 0                    | 1                    | 1                    | 2                    |
| 0                    | 4                    | 8                    | 10                   | 5                    | 5                    | 4                    | 5                    | 3                    | 1                    | 2                    | 1                    |
| 11                   | 15                   | 16                   | 29                   | 24                   | 21                   | 13                   | 13                   | 15                   | 11                   | 10                   | 7                    |
| 2                    | 2                    | 2                    | 5                    | 4                    | 4                    | 1                    | 2                    | 4                    | 3                    | 2                    | 4                    |
| 1                    | 4                    | 7                    | 8                    | 4                    | 4                    | 1                    | 1                    | 0                    | 5                    | 2                    | 3                    |
| 16                   | 16                   | 26                   | 16                   | 22                   | 18                   | 12                   | 16                   | 10                   | 32                   | 26                   | 27                   |
| 156                  | 64                   | 124                  | 123                  | 109                  | 50                   | 78                   | 90                   | 52                   | 163                  | 109                  | 141                  |
| 13                   | 14                   | 21                   | 27                   | 16                   | 8                    | 10                   | 13                   | 11                   | 7                    | 9                    | 5                    |
| 17                   | 22                   | 30                   | 20                   | 23                   | 17                   | 20                   | 23                   | 26                   | 13                   | 10                   | 10                   |
